# Supplementary material
Source: PubMed Central journal article supplement (PMC8418279)
Supplement: 415_2021_10784_MOESM1_ESM.pdf [file 415_2021_10784_MOESM1_ESM.pdf]

## **COVID-19 Manifestations in People with Parkinson's Disease: a USA cohort**

Yaqian Xu, MD MPH, Matthew Surface, BA, Amanda K. Chan, BA, Joshua Halpern, MS, Nora Vanegas-Arroyave, MD, Blair Ford, MD, Megan P. Feeney, MPH, Kimberly T. Kwei, MD PhD, Linn E. Katus, DO MSc, Sheng-Han Kuo, MD, Hiral Shah, MD, Cheryl Waters, MD, Linda M. Winfield, RN MPH, James C. Beck, PhD, Serge Przedborski, MD PhD, Stanley Fahn, MD, and Roy N. Alcalay, MD MS

### **Online Resource**

**Supplementary Table 1.** Commonly reported symptoms newly developed during COVID-19 illness

**Supplementary Figure 1.** Patients with Parkinson's disease and COVID-19 enrollment flowchart

**Supplementary Figure 2.** COVID-19 related death distribution by age and gender

### **Supplementary Survey**

CUIMC registry cohort

PF survey cohort

**Supplementary Table 1.** Commonly reported symptoms newly developed during COVID-19 illness

|                                                | <b>N (Yes, developed this symptom)</b> | <b>N (Total responses received) *</b> | <b>Percentage (yes/total)</b> |
|------------------------------------------------|----------------------------------------|---------------------------------------|-------------------------------|
| <b>Common COVID-19 symptoms</b>                |                                        |                                       |                               |
| Fatigue or Tiredness                           | 31                                     | 38                                    | 81.6%                         |
| Fever or chills                                | 31                                     | 45                                    | 68.9%                         |
| Weight loss                                    | 24                                     | 36                                    | 66.7%                         |
| Cough                                          | 28                                     | 44                                    | 63.6%                         |
| Body Temperature higher than 100.4 F or 38.0 C | 16                                     | 35                                    | 45.7%                         |
| Muscle or body ache/pain                       | 14                                     | 35                                    | 40.0%                         |
| Headache                                       | 13                                     | 34                                    | 38.2%                         |
| Chest congestion                               | 13                                     | 35                                    | 37.1%                         |
| Shortness of breath                            | 14                                     | 39                                    | 35.9%                         |
| Temporary loss of smell                        | 10                                     | 35                                    | 28.6%                         |
| Sore throat                                    | 10                                     | 36                                    | 27.8%                         |
| Nausea                                         | 10                                     | 36                                    | 27.8%                         |
| Runny or stuffy nose                           | 9                                      | 36                                    | 25.0%                         |
| Diarrhea                                       | 8                                      | 35                                    | 22.9%                         |
| Temporary loss of taste                        | 8                                      | 36                                    | 22.2%                         |
| Urinary issues                                 | 5                                      | 27                                    | 18.5%                         |
| Abdominal discomfort                           | 5                                      | 35                                    | 14.3%                         |
| Hair loss                                      | 5                                      | 35                                    | 14.3%                         |
| Dry skin                                       | 4                                      | 35                                    | 11.4%                         |
| Sneezing                                       | 3                                      | 35                                    | 8.6%                          |
| Vomiting                                       | 3                                      | 35                                    | 8.6%                          |
| Skin rash                                      | 2                                      | 35                                    | 5.7%                          |
| <b>Neurological symptoms</b>                   |                                        |                                       |                               |
| Weakness                                       | 20                                     | 35                                    | 57.1%                         |
| Difficulty walking                             | 11                                     | 25                                    | 44.0%                         |
| Dizziness                                      | 13                                     | 34                                    | 38.2%                         |
| Bradykinesia                                   | 9                                      | 25                                    | 36.0%                         |
| Confusion                                      | 11                                     | 37                                    | 29.7%                         |
| Other                                          | 10                                     | 35                                    | 28.6%                         |
| Sleep- Insomnia                                | 7                                      | 25                                    | 28.0%                         |

|                        |   |    |       |
|------------------------|---|----|-------|
| Ataxia                 | 6 | 24 | 25.0% |
| Anxiety                | 6 | 25 | 24.0% |
| Apathy                 | 6 | 25 | 24.0% |
| Visual changes         | 8 | 34 | 23.5% |
| Rigidity               | 5 | 25 | 20.0% |
| Constipation           | 5 | 25 | 20.0% |
| Pain                   | 5 | 25 | 20.0% |
| OFF time               | 4 | 24 | 16.7% |
| Memory Loss            | 4 | 25 | 16.0% |
| Falls                  | 4 | 26 | 15.4% |
| Numbness/tingling      | 3 | 25 | 12.0% |
| Tremor                 | 3 | 25 | 12.0% |
| Dyskinesia             | 3 | 25 | 12.0% |
| Double vision          | 3 | 34 | 8.8%  |
| Hallucinations         | 2 | 26 | 7.7%  |
| Tinnitus               | 2 | 34 | 5.9%  |
| Facial twitches        | 2 | 34 | 5.9%  |
| Loss of consciousness  | 1 | 33 | 3.0%  |
| Body/Arms/Leg twitches | 1 | 34 | 2.9%  |
| Nerve pain             | 1 | 34 | 2.9%  |
| Loss of sensation      | 1 | 34 | 2.9%  |

---

\* Not all participants responded to all symptom questions, this N represents the number of total responses received for each question (including “Yes” and “No” answers).

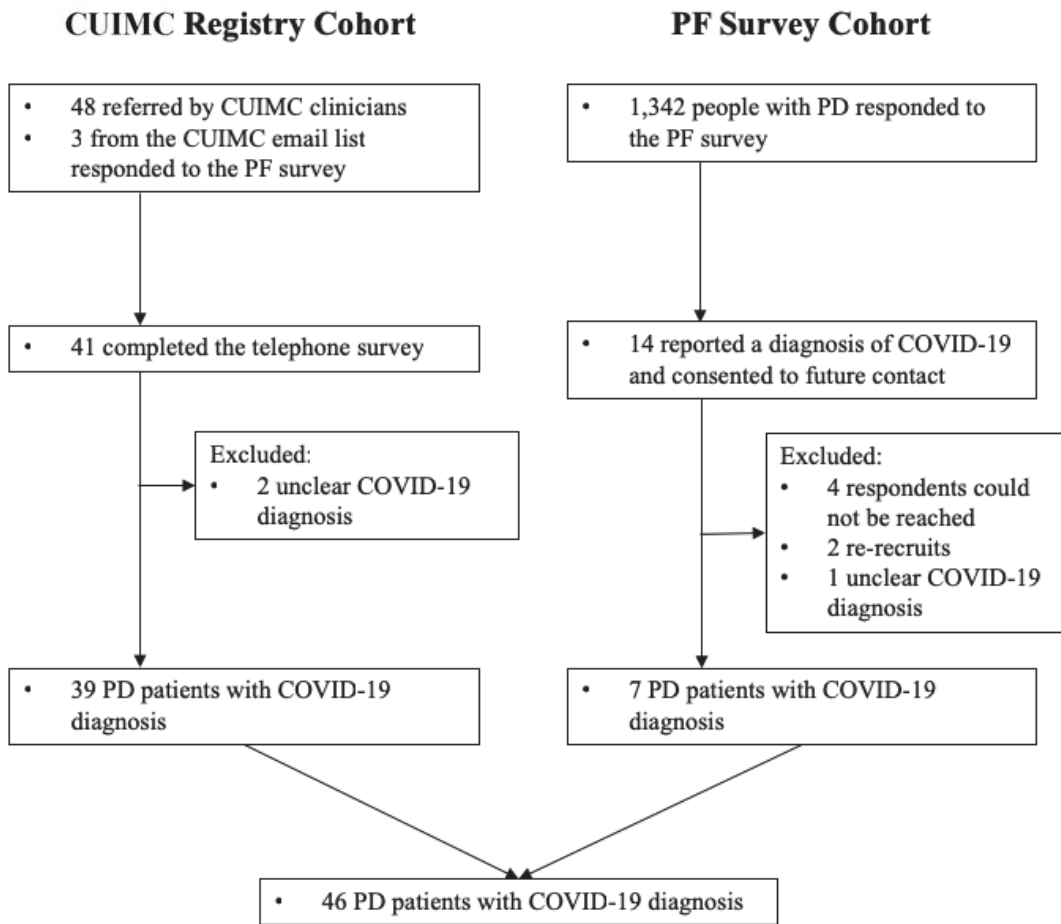

**Supplementary Figure 1.** Patients with Parkinson’s disease and COVID-19 enrollment flowchart

Abbreviations: **PD**, Parkinson’s Disease; **CUIMC**, Columbia University Irving Medical Center; **PF**, Parkinson’s Foundation

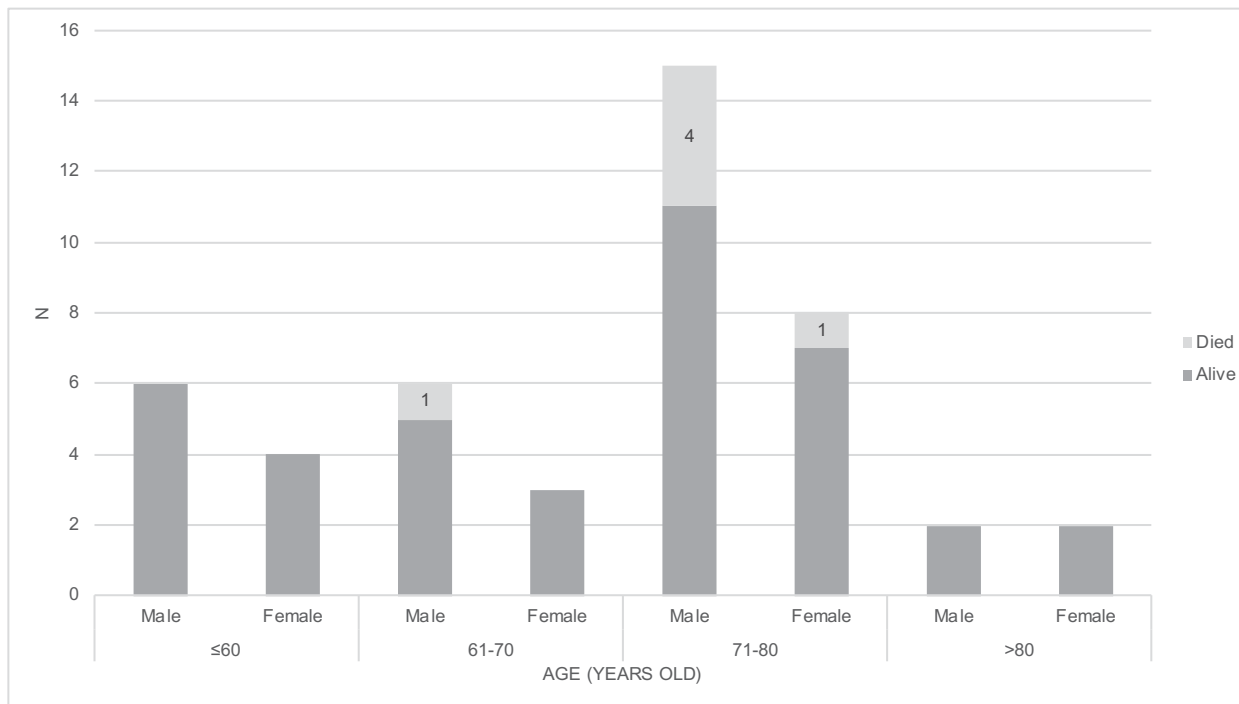

**Supplementary Figure 2.** COVID-19 related death distribution by age and gender

Age was stratified into 4 categories. Death due to COVID-19 was indicated in light grey, and those who are alive in dark grey. In the 61-70 age group, 1 male patient died because of COVID-19; in the 71-80 age group, 4 male and 1 female patient died because of COVID-19.

## **Supplementary Survey**

**CUIMC registry cohort**

**Movement Disorder COVID-19 Questionnaire (AAAT1585)**

[Project Home](#) [Project Setup](#) [Online Designer](#) [Data Dictionary](#) [Codebook](#)

**Data Dictionary Codebook**

11/02/2020 4:00pm

[^ Collapse all instruments](#)

| #                                                                                                                   | Variable / Field Name                                                      | Field Label<br><i>Field Note</i>                                                                     | Field Attributes (Field Type, Validation, Choices, Calculations, etc.)                                                                                                                                                                                                                                                                                                                                                                                               |   |                                  |   |                                 |   |                        |   |                      |   |                                  |   |                        |   |                                      |   |                      |
|---------------------------------------------------------------------------------------------------------------------|----------------------------------------------------------------------------|------------------------------------------------------------------------------------------------------|----------------------------------------------------------------------------------------------------------------------------------------------------------------------------------------------------------------------------------------------------------------------------------------------------------------------------------------------------------------------------------------------------------------------------------------------------------------------|---|----------------------------------|---|---------------------------------|---|------------------------|---|----------------------|---|----------------------------------|---|------------------------|---|--------------------------------------|---|----------------------|
| Instrument: <b>Telephone Survey</b> (telephone_survey) <a href="#">Enabled as survey</a> <a href="#">^ Collapse</a> |                                                                            |                                                                                                      |                                                                                                                                                                                                                                                                                                                                                                                                                                                                      |   |                                  |   |                                 |   |                        |   |                      |   |                                  |   |                        |   |                                      |   |                      |
| 1                                                                                                                   | record_id                                                                  | Record ID                                                                                            | text                                                                                                                                                                                                                                                                                                                                                                                                                                                                 |   |                                  |   |                                 |   |                        |   |                      |   |                                  |   |                        |   |                                      |   |                      |
| 2                                                                                                                   | subject_id                                                                 | Subject ID                                                                                           | text, Required                                                                                                                                                                                                                                                                                                                                                                                                                                                       |   |                                  |   |                                 |   |                        |   |                      |   |                                  |   |                        |   |                                      |   |                      |
| 3                                                                                                                   | demo_1                                                                     | Section Header: <i>I. Demographics</i><br>Year of Birth                                              | text                                                                                                                                                                                                                                                                                                                                                                                                                                                                 |   |                                  |   |                                 |   |                        |   |                      |   |                                  |   |                        |   |                                      |   |                      |
| 4                                                                                                                   | demo_2                                                                     | Age                                                                                                  | text                                                                                                                                                                                                                                                                                                                                                                                                                                                                 |   |                                  |   |                                 |   |                        |   |                      |   |                                  |   |                        |   |                                      |   |                      |
| 5                                                                                                                   | demo_3                                                                     | Gender                                                                                               | radio<br><table border="1"> <tr><td>1</td><td>Male</td></tr> <tr><td>2</td><td>Female</td></tr> <tr><td>3</td><td>Other</td></tr> <tr><td>4</td><td>Prefer not to answer</td></tr> </table>                                                                                                                                                                                                                                                                          | 1 | Male                             | 2 | Female                          | 3 | Other                  | 4 | Prefer not to answer |   |                                  |   |                        |   |                                      |   |                      |
| 1                                                                                                                   | Male                                                                       |                                                                                                      |                                                                                                                                                                                                                                                                                                                                                                                                                                                                      |   |                                  |   |                                 |   |                        |   |                      |   |                                  |   |                        |   |                                      |   |                      |
| 2                                                                                                                   | Female                                                                     |                                                                                                      |                                                                                                                                                                                                                                                                                                                                                                                                                                                                      |   |                                  |   |                                 |   |                        |   |                      |   |                                  |   |                        |   |                                      |   |                      |
| 3                                                                                                                   | Other                                                                      |                                                                                                      |                                                                                                                                                                                                                                                                                                                                                                                                                                                                      |   |                                  |   |                                 |   |                        |   |                      |   |                                  |   |                        |   |                                      |   |                      |
| 4                                                                                                                   | Prefer not to answer                                                       |                                                                                                      |                                                                                                                                                                                                                                                                                                                                                                                                                                                                      |   |                                  |   |                                 |   |                        |   |                      |   |                                  |   |                        |   |                                      |   |                      |
| 6                                                                                                                   | dem_4                                                                      | Race/Ethnicity                                                                                       | radio<br><table border="1"> <tr><td>1</td><td>American Indian or Alaska Native</td></tr> <tr><td>2</td><td>Asian</td></tr> <tr><td>3</td><td>Black/African American</td></tr> <tr><td>4</td><td>Hispanic/Latino</td></tr> <tr><td>5</td><td>Native Hawaiian Pacific Islander</td></tr> <tr><td>6</td><td>White/Caucasian, Mixed</td></tr> <tr><td>7</td><td>Some other race, ethnicity or origin</td></tr> <tr><td>8</td><td>Prefer not to answer</td></tr> </table> | 1 | American Indian or Alaska Native | 2 | Asian                           | 3 | Black/African American | 4 | Hispanic/Latino      | 5 | Native Hawaiian Pacific Islander | 6 | White/Caucasian, Mixed | 7 | Some other race, ethnicity or origin | 8 | Prefer not to answer |
| 1                                                                                                                   | American Indian or Alaska Native                                           |                                                                                                      |                                                                                                                                                                                                                                                                                                                                                                                                                                                                      |   |                                  |   |                                 |   |                        |   |                      |   |                                  |   |                        |   |                                      |   |                      |
| 2                                                                                                                   | Asian                                                                      |                                                                                                      |                                                                                                                                                                                                                                                                                                                                                                                                                                                                      |   |                                  |   |                                 |   |                        |   |                      |   |                                  |   |                        |   |                                      |   |                      |
| 3                                                                                                                   | Black/African American                                                     |                                                                                                      |                                                                                                                                                                                                                                                                                                                                                                                                                                                                      |   |                                  |   |                                 |   |                        |   |                      |   |                                  |   |                        |   |                                      |   |                      |
| 4                                                                                                                   | Hispanic/Latino                                                            |                                                                                                      |                                                                                                                                                                                                                                                                                                                                                                                                                                                                      |   |                                  |   |                                 |   |                        |   |                      |   |                                  |   |                        |   |                                      |   |                      |
| 5                                                                                                                   | Native Hawaiian Pacific Islander                                           |                                                                                                      |                                                                                                                                                                                                                                                                                                                                                                                                                                                                      |   |                                  |   |                                 |   |                        |   |                      |   |                                  |   |                        |   |                                      |   |                      |
| 6                                                                                                                   | White/Caucasian, Mixed                                                     |                                                                                                      |                                                                                                                                                                                                                                                                                                                                                                                                                                                                      |   |                                  |   |                                 |   |                        |   |                      |   |                                  |   |                        |   |                                      |   |                      |
| 7                                                                                                                   | Some other race, ethnicity or origin                                       |                                                                                                      |                                                                                                                                                                                                                                                                                                                                                                                                                                                                      |   |                                  |   |                                 |   |                        |   |                      |   |                                  |   |                        |   |                                      |   |                      |
| 8                                                                                                                   | Prefer not to answer                                                       |                                                                                                      |                                                                                                                                                                                                                                                                                                                                                                                                                                                                      |   |                                  |   |                                 |   |                        |   |                      |   |                                  |   |                        |   |                                      |   |                      |
| 7                                                                                                                   | dem_5                                                                      | Marital Status                                                                                       | radio<br><table border="1"> <tr><td>1</td><td>Single [never married]</td></tr> <tr><td>2</td><td>Married or domestic partnership</td></tr> <tr><td>3</td><td>Separated</td></tr> <tr><td>4</td><td>Widowed</td></tr> <tr><td>5</td><td>Divorced</td></tr> </table>                                                                                                                                                                                                   | 1 | Single [never married]           | 2 | Married or domestic partnership | 3 | Separated              | 4 | Widowed              | 5 | Divorced                         |   |                        |   |                                      |   |                      |
| 1                                                                                                                   | Single [never married]                                                     |                                                                                                      |                                                                                                                                                                                                                                                                                                                                                                                                                                                                      |   |                                  |   |                                 |   |                        |   |                      |   |                                  |   |                        |   |                                      |   |                      |
| 2                                                                                                                   | Married or domestic partnership                                            |                                                                                                      |                                                                                                                                                                                                                                                                                                                                                                                                                                                                      |   |                                  |   |                                 |   |                        |   |                      |   |                                  |   |                        |   |                                      |   |                      |
| 3                                                                                                                   | Separated                                                                  |                                                                                                      |                                                                                                                                                                                                                                                                                                                                                                                                                                                                      |   |                                  |   |                                 |   |                        |   |                      |   |                                  |   |                        |   |                                      |   |                      |
| 4                                                                                                                   | Widowed                                                                    |                                                                                                      |                                                                                                                                                                                                                                                                                                                                                                                                                                                                      |   |                                  |   |                                 |   |                        |   |                      |   |                                  |   |                        |   |                                      |   |                      |
| 5                                                                                                                   | Divorced                                                                   |                                                                                                      |                                                                                                                                                                                                                                                                                                                                                                                                                                                                      |   |                                  |   |                                 |   |                        |   |                      |   |                                  |   |                        |   |                                      |   |                      |
| 8                                                                                                                   | dem_6                                                                      | Zip Code                                                                                             | text (number)                                                                                                                                                                                                                                                                                                                                                                                                                                                        |   |                                  |   |                                 |   |                        |   |                      |   |                                  |   |                        |   |                                      |   |                      |
| 9                                                                                                                   | dem_7                                                                      | At what age was Parkinson's disease diagnosed?                                                       | text (number)                                                                                                                                                                                                                                                                                                                                                                                                                                                        |   |                                  |   |                                 |   |                        |   |                      |   |                                  |   |                        |   |                                      |   |                      |
| 10                                                                                                                  | dem_8                                                                      | At what age did the motor symptoms begin?                                                            | text (number)                                                                                                                                                                                                                                                                                                                                                                                                                                                        |   |                                  |   |                                 |   |                        |   |                      |   |                                  |   |                        |   |                                      |   |                      |
| 11                                                                                                                  | dem_9                                                                      | Is the subject of this survey alive?                                                                 | radio<br><table border="1"> <tr><td>1</td><td>Yes</td></tr> <tr><td>2</td><td>No</td></tr> </table>                                                                                                                                                                                                                                                                                                                                                                  | 1 | Yes                              | 2 | No                              |   |                        |   |                      |   |                                  |   |                        |   |                                      |   |                      |
| 1                                                                                                                   | Yes                                                                        |                                                                                                      |                                                                                                                                                                                                                                                                                                                                                                                                                                                                      |   |                                  |   |                                 |   |                        |   |                      |   |                                  |   |                        |   |                                      |   |                      |
| 2                                                                                                                   | No                                                                         |                                                                                                      |                                                                                                                                                                                                                                                                                                                                                                                                                                                                      |   |                                  |   |                                 |   |                        |   |                      |   |                                  |   |                        |   |                                      |   |                      |
| 12                                                                                                                  | covid_1                                                                    | Section Header: <i>II. COVID-19 Questions</i><br>Do you think you've been infected with coronavirus? | radio, Required<br><table border="1"> <tr><td>1</td><td>Yes</td></tr> <tr><td>2</td><td>No</td></tr> <tr><td>3</td><td>Unsure</td></tr> </table>                                                                                                                                                                                                                                                                                                                     | 1 | Yes                              | 2 | No                              | 3 | Unsure                 |   |                      |   |                                  |   |                        |   |                                      |   |                      |
| 1                                                                                                                   | Yes                                                                        |                                                                                                      |                                                                                                                                                                                                                                                                                                                                                                                                                                                                      |   |                                  |   |                                 |   |                        |   |                      |   |                                  |   |                        |   |                                      |   |                      |
| 2                                                                                                                   | No                                                                         |                                                                                                      |                                                                                                                                                                                                                                                                                                                                                                                                                                                                      |   |                                  |   |                                 |   |                        |   |                      |   |                                  |   |                        |   |                                      |   |                      |
| 3                                                                                                                   | Unsure                                                                     |                                                                                                      |                                                                                                                                                                                                                                                                                                                                                                                                                                                                      |   |                                  |   |                                 |   |                        |   |                      |   |                                  |   |                        |   |                                      |   |                      |
| 13                                                                                                                  | covid_1_1<br>Show the field ONLY if:<br>[covid_1] = "1" or [covid_1] = "3" | When did you start having symptoms that you think were caused by the coronavirus?                    | text (date_mdy)                                                                                                                                                                                                                                                                                                                                                                                                                                                      |   |                                  |   |                                 |   |                        |   |                      |   |                                  |   |                        |   |                                      |   |                      |

|    |                                                                                                       |                                                                                                                                                             |                                                                                                                                                                                                                                                                                                                                                                                                                                                                                                                                                                                                                                                                                      |   |                                                              |                                       |                                                                       |                |                                                 |   |                                        |                                          |       |              |                                   |   |              |                                |   |              |                   |   |              |                                                              |
|----|-------------------------------------------------------------------------------------------------------|-------------------------------------------------------------------------------------------------------------------------------------------------------------|--------------------------------------------------------------------------------------------------------------------------------------------------------------------------------------------------------------------------------------------------------------------------------------------------------------------------------------------------------------------------------------------------------------------------------------------------------------------------------------------------------------------------------------------------------------------------------------------------------------------------------------------------------------------------------------|---|--------------------------------------------------------------|---------------------------------------|-----------------------------------------------------------------------|----------------|-------------------------------------------------|---|----------------------------------------|------------------------------------------|-------|--------------|-----------------------------------|---|--------------|--------------------------------|---|--------------|-------------------|---|--------------|--------------------------------------------------------------|
| 14 | covid_1_2<br>Show the field ONLY if:<br>[covid_1] = "1" or [covid_1] = "3"                            | How long did those symptoms last (days)?                                                                                                                    | text (number)                                                                                                                                                                                                                                                                                                                                                                                                                                                                                                                                                                                                                                                                        |   |                                                              |                                       |                                                                       |                |                                                 |   |                                        |                                          |       |              |                                   |   |              |                                |   |              |                   |   |              |                                                              |
| 15 | covid_1_3<br>Show the field ONLY if:<br>[covid_1] = "1" or [covid_1] = "3"                            | Have you been tested for the coronavirus? If so, what was the result?                                                                                       | radio<br><table border="1"> <tr> <td>1</td> <td>I have been tested and I tested positive (I had coronavirus)</td> </tr> <tr> <td>2</td> <td>I have been tested and I tested negative (I did not have coronavirus)</td> </tr> <tr> <td>3</td> <td>I have been tested and I do not know the result</td> </tr> <tr> <td>4</td> <td>I have not been tested</td> </tr> </table>                                                                                                                                                                                                                                                                                                           | 1 | I have been tested and I tested positive (I had coronavirus) | 2                                     | I have been tested and I tested negative (I did not have coronavirus) | 3              | I have been tested and I do not know the result | 4 | I have not been tested                 |                                          |       |              |                                   |   |              |                                |   |              |                   |   |              |                                                              |
| 1  | I have been tested and I tested positive (I had coronavirus)                                          |                                                                                                                                                             |                                                                                                                                                                                                                                                                                                                                                                                                                                                                                                                                                                                                                                                                                      |   |                                                              |                                       |                                                                       |                |                                                 |   |                                        |                                          |       |              |                                   |   |              |                                |   |              |                   |   |              |                                                              |
| 2  | I have been tested and I tested negative (I did not have coronavirus)                                 |                                                                                                                                                             |                                                                                                                                                                                                                                                                                                                                                                                                                                                                                                                                                                                                                                                                                      |   |                                                              |                                       |                                                                       |                |                                                 |   |                                        |                                          |       |              |                                   |   |              |                                |   |              |                   |   |              |                                                              |
| 3  | I have been tested and I do not know the result                                                       |                                                                                                                                                             |                                                                                                                                                                                                                                                                                                                                                                                                                                                                                                                                                                                                                                                                                      |   |                                                              |                                       |                                                                       |                |                                                 |   |                                        |                                          |       |              |                                   |   |              |                                |   |              |                   |   |              |                                                              |
| 4  | I have not been tested                                                                                |                                                                                                                                                             |                                                                                                                                                                                                                                                                                                                                                                                                                                                                                                                                                                                                                                                                                      |   |                                                              |                                       |                                                                       |                |                                                 |   |                                        |                                          |       |              |                                   |   |              |                                |   |              |                   |   |              |                                                              |
| 16 | covid_1_3_1<br>Show the field ONLY if:<br>[covid_1_3] = "1" OR [covid_1_3] = "2" OR [covid_1_3] = "3" | How were you tested?                                                                                                                                        | checkbox<br><table border="1"> <tr> <td>1</td> <td>covid_1_3_1__1</td> <td>Nose swab (PCR)</td> </tr> <tr> <td>2</td> <td>covid_1_3_1__2</td> <td>Mouth swab (PCR)</td> </tr> <tr> <td>3</td> <td>covid_1_3_1__3</td> <td>Blood test (serology)</td> </tr> </table>                                                                                                                                                                                                                                                                                                                                                                                                                  | 1 | covid_1_3_1__1                                               | Nose swab (PCR)                       | 2                                                                     | covid_1_3_1__2 | Mouth swab (PCR)                                | 3 | covid_1_3_1__3                         | Blood test (serology)                    |       |              |                                   |   |              |                                |   |              |                   |   |              |                                                              |
| 1  | covid_1_3_1__1                                                                                        | Nose swab (PCR)                                                                                                                                             |                                                                                                                                                                                                                                                                                                                                                                                                                                                                                                                                                                                                                                                                                      |   |                                                              |                                       |                                                                       |                |                                                 |   |                                        |                                          |       |              |                                   |   |              |                                |   |              |                   |   |              |                                                              |
| 2  | covid_1_3_1__2                                                                                        | Mouth swab (PCR)                                                                                                                                            |                                                                                                                                                                                                                                                                                                                                                                                                                                                                                                                                                                                                                                                                                      |   |                                                              |                                       |                                                                       |                |                                                 |   |                                        |                                          |       |              |                                   |   |              |                                |   |              |                   |   |              |                                                              |
| 3  | covid_1_3_1__3                                                                                        | Blood test (serology)                                                                                                                                       |                                                                                                                                                                                                                                                                                                                                                                                                                                                                                                                                                                                                                                                                                      |   |                                                              |                                       |                                                                       |                |                                                 |   |                                        |                                          |       |              |                                   |   |              |                                |   |              |                   |   |              |                                                              |
| 17 | covid_1_4<br>Show the field ONLY if:<br>[covid_1] = "1" or [covid_1] = "3"                            | Whether or not you have had a coronavirus test, has a doctor or another healthcare professional diagnosed you as having or probably having the coronavirus? | radio<br><table border="1"> <tr> <td>1</td> <td>Yes</td> </tr> <tr> <td>2</td> <td>No</td> </tr> <tr> <td>3</td> <td>Unsure</td> </tr> </table>                                                                                                                                                                                                                                                                                                                                                                                                                                                                                                                                      | 1 | Yes                                                          | 2                                     | No                                                                    | 3              | Unsure                                          |   |                                        |                                          |       |              |                                   |   |              |                                |   |              |                   |   |              |                                                              |
| 1  | Yes                                                                                                   |                                                                                                                                                             |                                                                                                                                                                                                                                                                                                                                                                                                                                                                                                                                                                                                                                                                                      |   |                                                              |                                       |                                                                       |                |                                                 |   |                                        |                                          |       |              |                                   |   |              |                                |   |              |                   |   |              |                                                              |
| 2  | No                                                                                                    |                                                                                                                                                             |                                                                                                                                                                                                                                                                                                                                                                                                                                                                                                                                                                                                                                                                                      |   |                                                              |                                       |                                                                       |                |                                                 |   |                                        |                                          |       |              |                                   |   |              |                                |   |              |                   |   |              |                                                              |
| 3  | Unsure                                                                                                |                                                                                                                                                             |                                                                                                                                                                                                                                                                                                                                                                                                                                                                                                                                                                                                                                                                                      |   |                                                              |                                       |                                                                       |                |                                                 |   |                                        |                                          |       |              |                                   |   |              |                                |   |              |                   |   |              |                                                              |
| 18 | covid_1_5<br>Show the field ONLY if:<br>[covid_1] = "1" or [covid_1] = "3"                            | Have you contacted anyone, (other than the medical professionals that tested, or diagnosed, or treated you), to inform them you have coronavirus?           | radio<br><table border="1"> <tr> <td>1</td> <td>Yes</td> </tr> <tr> <td>2</td> <td>No</td> </tr> </table>                                                                                                                                                                                                                                                                                                                                                                                                                                                                                                                                                                            | 1 | Yes                                                          | 2                                     | No                                                                    |                |                                                 |   |                                        |                                          |       |              |                                   |   |              |                                |   |              |                   |   |              |                                                              |
| 1  | Yes                                                                                                   |                                                                                                                                                             |                                                                                                                                                                                                                                                                                                                                                                                                                                                                                                                                                                                                                                                                                      |   |                                                              |                                       |                                                                       |                |                                                 |   |                                        |                                          |       |              |                                   |   |              |                                |   |              |                   |   |              |                                                              |
| 2  | No                                                                                                    |                                                                                                                                                             |                                                                                                                                                                                                                                                                                                                                                                                                                                                                                                                                                                                                                                                                                      |   |                                                              |                                       |                                                                       |                |                                                 |   |                                        |                                          |       |              |                                   |   |              |                                |   |              |                   |   |              |                                                              |
| 19 | covid_1_6<br>Show the field ONLY if:<br>[covid_1] = "1" or [covid_1] = "3"                            | Who have you contacted to let them know that you think you have coronavirus? Please check all that apply.                                                   | checkbox<br><table border="1"> <tr> <td>1</td> <td>covid_1_6__1</td> <td>A local health departments or hotline</td> </tr> <tr> <td>2</td> <td>covid_1_6__2</td> <td>Hospital or emergency room</td> </tr> <tr> <td>3</td> <td>covid_1_6__3</td> <td>My primary care doctor or another doctor</td> </tr> <tr> <td>4</td> <td>covid_1_6__4</td> <td>My employer, supervisor or school</td> </tr> <tr> <td>5</td> <td>covid_1_6__5</td> <td>Community or religious leaders</td> </tr> <tr> <td>6</td> <td>covid_1_6__6</td> <td>Family or friends</td> </tr> <tr> <td>7</td> <td>covid_1_6__7</td> <td>Online social contacts such as people on Facebook or Twitter</td> </tr> </table> | 1 | covid_1_6__1                                                 | A local health departments or hotline | 2                                                                     | covid_1_6__2   | Hospital or emergency room                      | 3 | covid_1_6__3                           | My primary care doctor or another doctor | 4     | covid_1_6__4 | My employer, supervisor or school | 5 | covid_1_6__5 | Community or religious leaders | 6 | covid_1_6__6 | Family or friends | 7 | covid_1_6__7 | Online social contacts such as people on Facebook or Twitter |
| 1  | covid_1_6__1                                                                                          | A local health departments or hotline                                                                                                                       |                                                                                                                                                                                                                                                                                                                                                                                                                                                                                                                                                                                                                                                                                      |   |                                                              |                                       |                                                                       |                |                                                 |   |                                        |                                          |       |              |                                   |   |              |                                |   |              |                   |   |              |                                                              |
| 2  | covid_1_6__2                                                                                          | Hospital or emergency room                                                                                                                                  |                                                                                                                                                                                                                                                                                                                                                                                                                                                                                                                                                                                                                                                                                      |   |                                                              |                                       |                                                                       |                |                                                 |   |                                        |                                          |       |              |                                   |   |              |                                |   |              |                   |   |              |                                                              |
| 3  | covid_1_6__3                                                                                          | My primary care doctor or another doctor                                                                                                                    |                                                                                                                                                                                                                                                                                                                                                                                                                                                                                                                                                                                                                                                                                      |   |                                                              |                                       |                                                                       |                |                                                 |   |                                        |                                          |       |              |                                   |   |              |                                |   |              |                   |   |              |                                                              |
| 4  | covid_1_6__4                                                                                          | My employer, supervisor or school                                                                                                                           |                                                                                                                                                                                                                                                                                                                                                                                                                                                                                                                                                                                                                                                                                      |   |                                                              |                                       |                                                                       |                |                                                 |   |                                        |                                          |       |              |                                   |   |              |                                |   |              |                   |   |              |                                                              |
| 5  | covid_1_6__5                                                                                          | Community or religious leaders                                                                                                                              |                                                                                                                                                                                                                                                                                                                                                                                                                                                                                                                                                                                                                                                                                      |   |                                                              |                                       |                                                                       |                |                                                 |   |                                        |                                          |       |              |                                   |   |              |                                |   |              |                   |   |              |                                                              |
| 6  | covid_1_6__6                                                                                          | Family or friends                                                                                                                                           |                                                                                                                                                                                                                                                                                                                                                                                                                                                                                                                                                                                                                                                                                      |   |                                                              |                                       |                                                                       |                |                                                 |   |                                        |                                          |       |              |                                   |   |              |                                |   |              |                   |   |              |                                                              |
| 7  | covid_1_6__7                                                                                          | Online social contacts such as people on Facebook or Twitter                                                                                                |                                                                                                                                                                                                                                                                                                                                                                                                                                                                                                                                                                                                                                                                                      |   |                                                              |                                       |                                                                       |                |                                                 |   |                                        |                                          |       |              |                                   |   |              |                                |   |              |                   |   |              |                                                              |
| 20 | covid_1_7<br>Show the field ONLY if:<br>[covid_1] = "1" or [covid_1] = "3"                            | Whether or not you have been tested, or diagnosed, have you sought medical care for coronavirus?                                                            | yesno<br><table border="1"> <tr> <td>1</td> <td>Yes</td> </tr> <tr> <td>0</td> <td>No</td> </tr> </table>                                                                                                                                                                                                                                                                                                                                                                                                                                                                                                                                                                            | 1 | Yes                                                          | 0                                     | No                                                                    |                |                                                 |   |                                        |                                          |       |              |                                   |   |              |                                |   |              |                   |   |              |                                                              |
| 1  | Yes                                                                                                   |                                                                                                                                                             |                                                                                                                                                                                                                                                                                                                                                                                                                                                                                                                                                                                                                                                                                      |   |                                                              |                                       |                                                                       |                |                                                 |   |                                        |                                          |       |              |                                   |   |              |                                |   |              |                   |   |              |                                                              |
| 0  | No                                                                                                    |                                                                                                                                                             |                                                                                                                                                                                                                                                                                                                                                                                                                                                                                                                                                                                                                                                                                      |   |                                                              |                                       |                                                                       |                |                                                 |   |                                        |                                          |       |              |                                   |   |              |                                |   |              |                   |   |              |                                                              |
| 21 | covid_1_7_1<br>Show the field ONLY if:<br>[covid_1_7] = "1"                                           | Where did you first seek medical care for coronavirus?                                                                                                      | radio<br><table border="1"> <tr> <td>1</td> <td>Hospital or emergency room</td> </tr> <tr> <td>2</td> <td>Urgent care</td> </tr> <tr> <td>3</td> <td>My primary care doctor or another doctor</td> </tr> <tr> <td>4</td> <td>A local health department</td> </tr> <tr> <td>5</td> <td>Other</td> </tr> </table>                                                                                                                                                                                                                                                                                                                                                                      | 1 | Hospital or emergency room                                   | 2                                     | Urgent care                                                           | 3              | My primary care doctor or another doctor        | 4 | A local health department              | 5                                        | Other |              |                                   |   |              |                                |   |              |                   |   |              |                                                              |
| 1  | Hospital or emergency room                                                                            |                                                                                                                                                             |                                                                                                                                                                                                                                                                                                                                                                                                                                                                                                                                                                                                                                                                                      |   |                                                              |                                       |                                                                       |                |                                                 |   |                                        |                                          |       |              |                                   |   |              |                                |   |              |                   |   |              |                                                              |
| 2  | Urgent care                                                                                           |                                                                                                                                                             |                                                                                                                                                                                                                                                                                                                                                                                                                                                                                                                                                                                                                                                                                      |   |                                                              |                                       |                                                                       |                |                                                 |   |                                        |                                          |       |              |                                   |   |              |                                |   |              |                   |   |              |                                                              |
| 3  | My primary care doctor or another doctor                                                              |                                                                                                                                                             |                                                                                                                                                                                                                                                                                                                                                                                                                                                                                                                                                                                                                                                                                      |   |                                                              |                                       |                                                                       |                |                                                 |   |                                        |                                          |       |              |                                   |   |              |                                |   |              |                   |   |              |                                                              |
| 4  | A local health department                                                                             |                                                                                                                                                             |                                                                                                                                                                                                                                                                                                                                                                                                                                                                                                                                                                                                                                                                                      |   |                                                              |                                       |                                                                       |                |                                                 |   |                                        |                                          |       |              |                                   |   |              |                                |   |              |                   |   |              |                                                              |
| 5  | Other                                                                                                 |                                                                                                                                                             |                                                                                                                                                                                                                                                                                                                                                                                                                                                                                                                                                                                                                                                                                      |   |                                                              |                                       |                                                                       |                |                                                 |   |                                        |                                          |       |              |                                   |   |              |                                |   |              |                   |   |              |                                                              |
| 22 | covid_1_7_1_1<br>Show the field ONLY if:<br>[covid_1_7_1] = "5"                                       | Other: please specify                                                                                                                                       | text                                                                                                                                                                                                                                                                                                                                                                                                                                                                                                                                                                                                                                                                                 |   |                                                              |                                       |                                                                       |                |                                                 |   |                                        |                                          |       |              |                                   |   |              |                                |   |              |                   |   |              |                                                              |
| 23 | covid_1_8<br>Show the field ONLY if:<br>[covid_1_7] = "0"                                             | Why did you not seek care?                                                                                                                                  | radio<br><table border="1"> <tr> <td>1</td> <td>No insurance</td> </tr> <tr> <td>2</td> <td>No access</td> </tr> <tr> <td>3</td> <td>Did not think necessary</td> </tr> <tr> <td>4</td> <td>Was advised not to seek care by family</td> </tr> <tr> <td>5</td> <td>Other</td> </tr> </table>                                                                                                                                                                                                                                                                                                                                                                                          | 1 | No insurance                                                 | 2                                     | No access                                                             | 3              | Did not think necessary                         | 4 | Was advised not to seek care by family | 5                                        | Other |              |                                   |   |              |                                |   |              |                   |   |              |                                                              |
| 1  | No insurance                                                                                          |                                                                                                                                                             |                                                                                                                                                                                                                                                                                                                                                                                                                                                                                                                                                                                                                                                                                      |   |                                                              |                                       |                                                                       |                |                                                 |   |                                        |                                          |       |              |                                   |   |              |                                |   |              |                   |   |              |                                                              |
| 2  | No access                                                                                             |                                                                                                                                                             |                                                                                                                                                                                                                                                                                                                                                                                                                                                                                                                                                                                                                                                                                      |   |                                                              |                                       |                                                                       |                |                                                 |   |                                        |                                          |       |              |                                   |   |              |                                |   |              |                   |   |              |                                                              |
| 3  | Did not think necessary                                                                               |                                                                                                                                                             |                                                                                                                                                                                                                                                                                                                                                                                                                                                                                                                                                                                                                                                                                      |   |                                                              |                                       |                                                                       |                |                                                 |   |                                        |                                          |       |              |                                   |   |              |                                |   |              |                   |   |              |                                                              |
| 4  | Was advised not to seek care by family                                                                |                                                                                                                                                             |                                                                                                                                                                                                                                                                                                                                                                                                                                                                                                                                                                                                                                                                                      |   |                                                              |                                       |                                                                       |                |                                                 |   |                                        |                                          |       |              |                                   |   |              |                                |   |              |                   |   |              |                                                              |
| 5  | Other                                                                                                 |                                                                                                                                                             |                                                                                                                                                                                                                                                                                                                                                                                                                                                                                                                                                                                                                                                                                      |   |                                                              |                                       |                                                                       |                |                                                 |   |                                        |                                          |       |              |                                   |   |              |                                |   |              |                   |   |              |                                                              |



|    |                                                                               |                                                                                            |                                                                                                                   |
|----|-------------------------------------------------------------------------------|--------------------------------------------------------------------------------------------|-------------------------------------------------------------------------------------------------------------------|
| 24 | covid_1_8_1<br>Show the field ONLY if: [covid_1_8] = "5"                      | Other (Please specify _____)                                                               | text                                                                                                              |
| 25 | covid_1_7_1_2<br>Show the field ONLY if: [covid_1_7_1] = "1"                  | When you sought care from 'Hospital or Emergency Room', did you obtain care?               | radio<br>1 Yes, in person<br>2 Yes, phone or video care<br>3 Did not obtain care (follow up with a why? Question) |
| 26 | covid_1_7_1_2_1<br>Show the field ONLY if: [covid_1_7_1_2] = "3"              | Why?                                                                                       | text                                                                                                              |
| 27 | covid_1_7_1_3<br>Show the field ONLY if: [covid_1_7_1] = "2"                  | When you sought care from 'Urgent care', did you obtain care?                              | radio<br>1 Yes, in person<br>2 Yes, phone or video care<br>3 Did not obtain care (follow up with a why? Question) |
| 28 | covid_1_7_1_3_1<br>Show the field ONLY if: [covid_1_7_1_3] = "3"              | Why?                                                                                       | text                                                                                                              |
| 29 | covid_1_7_1_4<br>Show the field ONLY if: [covid_1_7_1] = "3"                  | When you sought care from 'My primary care doctor or another doctor', did you obtain care? | radio<br>1 Yes, in person<br>2 Yes, phone or video care<br>3 Did not obtain care (follow up with a why? Question) |
| 30 | covid_1_7_1_4_1<br>Show the field ONLY if: [covid_1_7_1_4] = "3"              | Why?                                                                                       | text                                                                                                              |
| 31 | covid_1_7_1_5<br>Show the field ONLY if: [covid_1_7_1] = "4"                  | When you sought care from 'A local health department', did you obtain care?                | radio<br>1 Yes, in person<br>2 Yes, phone or video care<br>3 Did not obtain care (follow up with a why? Question) |
| 32 | covid_1_7_1_5_1<br>Show the field ONLY if: [covid_1_7_1_5] = "3"              | Why?                                                                                       | text                                                                                                              |
| 33 | covid_1_7_1_6<br>Show the field ONLY if: [covid_1_7_1] = "5"                  | When you sought care from 'Other', did you obtain care?                                    | radio<br>1 Yes, in person<br>2 Yes, phone or video care<br>3 Did not obtain care (follow up with a why? Question) |
| 34 | covid_1_7_1_6_1<br>Show the field ONLY if: [covid_1_7_1_6] = "3"              | Why?                                                                                       | text                                                                                                              |
| 35 | covid_1_9<br>Show the field ONLY if: [covid_1] = "1" or [covid_1] = "3"       | Were you hospitalized for COVID?                                                           | radio<br>1 Not hospitalized<br>2 Hospitalized<br>3 Hospitalized and received Mechanical ventilation               |
| 36 | covid_1_9_1<br>Show the field ONLY if: [covid_1_9] = "2" OR [covid_1_9] = "3" | Which hospital?                                                                            | text                                                                                                              |
| 37 | covid_1_9_2<br>Show the field ONLY if: [covid_1_9] = "2" OR [covid_1_9] = "3" | Further details on hospitalization. (If deceased, full code/DNR/DNI?)                      | text                                                                                                              |

|    |                                                                                               |                                                                                                                                                                 |                                                             |
|----|-----------------------------------------------------------------------------------------------|-----------------------------------------------------------------------------------------------------------------------------------------------------------------|-------------------------------------------------------------|
| 38 | covid_1_10<br>Show the field ONLY if:<br>[covid_1] = "1" or [covid_1] = "3"                   | How would you describe the severity of your COVID/COVID-like illness?                                                                                           | radio<br>1 Asymptomatic<br>2 Mild<br>3 Moderate<br>4 Severe |
| 39 | covid_1_11<br>Show the field ONLY if:<br>[dem_9] = "2"                                        | Did this person die due to COVID-19 or a COVID-19 related complication?                                                                                         | radio<br>1 Yes<br>2 No                                      |
| 40 | covid_1_12<br>Show the field ONLY if:<br>[covid_1_11] = "1"                                   | What was the cause of death?                                                                                                                                    | text                                                        |
| 41 | sympt_1<br>Show the field ONLY if:<br>[covid_1] = "1" or [covid_1] = "3"                      | Section Header: <i>(COVID symptoms) Have you experienced any of the following new symptoms during your COVID/ COVID-like illness? Common</i><br>Fever or chills | radio<br>0 0=no,<br>1 1=mild<br>2 2=moderate<br>3 3=severe  |
| 42 | sympt_1_2<br>Show the field ONLY if:<br>[sympt_1] = "1" or [sympt_1] = "2" or [sympt_1] = "3" | Duration of Symptom (in days)<br>(Fever and chills)                                                                                                             | text (number)                                               |
| 43 | sympt_1_3<br>Show the field ONLY if:<br>[sympt_1] = "1" or [sympt_1] = "2" or [sympt_1] = "3" | Details of the symptom (Can you describe the symptom in more detail?)<br>(Fever and chills)                                                                     | notes                                                       |
| 44 | sympt_2<br>Show the field ONLY if:<br>[covid_1] = "1" OR [covid_1] = "3"                      | Body Temperature higher than 100.4 F or 38.0 C                                                                                                                  | radio<br>0 Yes<br>1 No                                      |
| 45 | sympt_2_2<br>Show the field ONLY if:<br>[sympt_2] = "0"                                       | Duration of Symptom (in days)<br>(Body Temperature higher than 100.4 F or 38.0 C)                                                                               | text (number)                                               |
| 46 | sympt_2_3<br>Show the field ONLY if:<br>[sympt_2] = "0"                                       | Details of the symptom (Can you describe the symptom in more detail?)<br><br>(Body Temperature higher than 100.4 F or 38.0 C)                                   | notes                                                       |
| 47 | sympt_3<br>Show the field ONLY if:<br>[covid_1] = "1" OR [covid_1] = "3"                      | Fatigue or Tiredness                                                                                                                                            | radio<br>0 0=no,<br>1 1=mild<br>2 2=moderate<br>3 3=severe  |
| 48 | sympt_3_2<br>Show the field ONLY if:<br>[sympt_3] = "1" OR [sympt_3] = "2" OR [sympt_3] = "3" | Duration of Symptom (in days)<br>(Fatigue or Tiredness)                                                                                                         | text (number)                                               |
| 49 | sympt_3_3<br>Show the field ONLY if:<br>[sympt_3] = "1" OR [sympt_3] = "2" OR [sympt_3] = "3" | Details of the symptom (Can you describe the symptom in more detail?)<br>(Fatigue or Tiredness)                                                                 | notes                                                       |

|    |                                                                                                           |                                                                                                               |                                                                                                                                                                                          |   |      |   |        |   |            |   |          |
|----|-----------------------------------------------------------------------------------------------------------|---------------------------------------------------------------------------------------------------------------|------------------------------------------------------------------------------------------------------------------------------------------------------------------------------------------|---|------|---|--------|---|------------|---|----------|
| 50 | <p>sympt_4</p> <p>Show the field ONLY if:<br/>[covid_1] = "1" OR [covid_1] = "3"</p>                      | <p>Runny or stuffy nose</p>                                                                                   | <p>radio</p> <table border="1"> <tr><td>0</td><td>0=no</td></tr> <tr><td>1</td><td>1=mild</td></tr> <tr><td>2</td><td>2=moderate</td></tr> <tr><td>3</td><td>3=severe</td></tr> </table> | 0 | 0=no | 1 | 1=mild | 2 | 2=moderate | 3 | 3=severe |
| 0  | 0=no                                                                                                      |                                                                                                               |                                                                                                                                                                                          |   |      |   |        |   |            |   |          |
| 1  | 1=mild                                                                                                    |                                                                                                               |                                                                                                                                                                                          |   |      |   |        |   |            |   |          |
| 2  | 2=moderate                                                                                                |                                                                                                               |                                                                                                                                                                                          |   |      |   |        |   |            |   |          |
| 3  | 3=severe                                                                                                  |                                                                                                               |                                                                                                                                                                                          |   |      |   |        |   |            |   |          |
| 51 | <p>sympt_4_2</p> <p>Show the field ONLY if:<br/>[sympt_4] = "1" OR [sympt_4] = "2" OR [sympt_4] = "3"</p> | <p>Duration of Symptom (in days)</p> <p>(Runny or stuffy nose)</p>                                            | <p>text (number)</p>                                                                                                                                                                     |   |      |   |        |   |            |   |          |
| 52 | <p>sympt_4_3</p> <p>Show the field ONLY if:<br/>[sympt_4] = "1" OR [sympt_4] = "2" OR [sympt_4] = "3"</p> | <p>Details of the symptom (Can you describe the symptom in more detail?)</p> <p>(Runny or stuffy nose)</p>    | <p>notes</p>                                                                                                                                                                             |   |      |   |        |   |            |   |          |
| 53 | <p>sympt_5</p> <p>Show the field ONLY if:<br/>[covid_1] = "1" OR [covid_1] = "3"</p>                      | <p>Sneezing</p>                                                                                               | <p>radio</p> <table border="1"> <tr><td>0</td><td>0=no</td></tr> <tr><td>1</td><td>1=mild</td></tr> <tr><td>2</td><td>2=moderate</td></tr> <tr><td>3</td><td>3=severe</td></tr> </table> | 0 | 0=no | 1 | 1=mild | 2 | 2=moderate | 3 | 3=severe |
| 0  | 0=no                                                                                                      |                                                                                                               |                                                                                                                                                                                          |   |      |   |        |   |            |   |          |
| 1  | 1=mild                                                                                                    |                                                                                                               |                                                                                                                                                                                          |   |      |   |        |   |            |   |          |
| 2  | 2=moderate                                                                                                |                                                                                                               |                                                                                                                                                                                          |   |      |   |        |   |            |   |          |
| 3  | 3=severe                                                                                                  |                                                                                                               |                                                                                                                                                                                          |   |      |   |        |   |            |   |          |
| 54 | <p>sympt_5_2</p> <p>Show the field ONLY if:<br/>[sympt_5] = "1" OR [sympt_5] = "2" OR [sympt_5] = "3"</p> | <p>Duration of Symptom (in days)</p> <p>(Sneezing)</p>                                                        | <p>text (number)</p>                                                                                                                                                                     |   |      |   |        |   |            |   |          |
| 55 | <p>sympt_5_3</p> <p>Show the field ONLY if:<br/>[sympt_5] = "1" OR [sympt_5] = "2" OR [sympt_5] = "3"</p> | <p>Details of the symptom (Can you describe the symptom in more detail?)</p> <p>(Sneezing)</p>                | <p>notes</p>                                                                                                                                                                             |   |      |   |        |   |            |   |          |
| 56 | <p>sympt_6</p> <p>Show the field ONLY if:<br/>[covid_1] = "1" OR [covid_1] = "3"</p>                      | <p>Temporary loss of smell</p>                                                                                | <p>radio</p> <table border="1"> <tr><td>0</td><td>0=no</td></tr> <tr><td>1</td><td>1=mild</td></tr> <tr><td>2</td><td>2=moderate</td></tr> <tr><td>3</td><td>3=severe</td></tr> </table> | 0 | 0=no | 1 | 1=mild | 2 | 2=moderate | 3 | 3=severe |
| 0  | 0=no                                                                                                      |                                                                                                               |                                                                                                                                                                                          |   |      |   |        |   |            |   |          |
| 1  | 1=mild                                                                                                    |                                                                                                               |                                                                                                                                                                                          |   |      |   |        |   |            |   |          |
| 2  | 2=moderate                                                                                                |                                                                                                               |                                                                                                                                                                                          |   |      |   |        |   |            |   |          |
| 3  | 3=severe                                                                                                  |                                                                                                               |                                                                                                                                                                                          |   |      |   |        |   |            |   |          |
| 57 | <p>sympt_6_2</p> <p>Show the field ONLY if:<br/>[sympt_6] = "1" OR [sympt_6] = "2" OR [sympt_6] = "3"</p> | <p>Duration of Symptom (in days)</p> <p>(Temporary loss of smell)</p>                                         | <p>text (number)</p>                                                                                                                                                                     |   |      |   |        |   |            |   |          |
| 58 | <p>sympt_6_3</p> <p>Show the field ONLY if:<br/>[sympt_6] = "1" OR [sympt_6] = "2" OR [sympt_6] = "3"</p> | <p>Details of the symptom (Can you describe the symptom in more detail?)</p> <p>(Temporary loss of smell)</p> | <p>notes</p>                                                                                                                                                                             |   |      |   |        |   |            |   |          |
| 59 | <p>sympt_7</p> <p>Show the field ONLY if:<br/>[covid_1] = "1" OR [covid_1] = "3"</p>                      | <p>Sore throat</p>                                                                                            | <p>radio</p> <table border="1"> <tr><td>0</td><td>0=no</td></tr> <tr><td>1</td><td>1=mild</td></tr> <tr><td>2</td><td>2=moderate</td></tr> <tr><td>3</td><td>3=severe</td></tr> </table> | 0 | 0=no | 1 | 1=mild | 2 | 2=moderate | 3 | 3=severe |
| 0  | 0=no                                                                                                      |                                                                                                               |                                                                                                                                                                                          |   |      |   |        |   |            |   |          |
| 1  | 1=mild                                                                                                    |                                                                                                               |                                                                                                                                                                                          |   |      |   |        |   |            |   |          |
| 2  | 2=moderate                                                                                                |                                                                                                               |                                                                                                                                                                                          |   |      |   |        |   |            |   |          |
| 3  | 3=severe                                                                                                  |                                                                                                               |                                                                                                                                                                                          |   |      |   |        |   |            |   |          |
| 60 | <p>sympt_7_2</p> <p>Show the field ONLY if:<br/>[sympt_7] = "1" OR [sympt_7] = "2" OR [sympt_7] = "3"</p> | <p>Duration of Symptom (in days)</p> <p>(Sore throat)</p>                                                     | <p>text (number)</p>                                                                                                                                                                     |   |      |   |        |   |            |   |          |

|    |                                                                                                               |                                                                                                               |                                                                                                                                                                                          |   |      |   |        |   |            |   |          |
|----|---------------------------------------------------------------------------------------------------------------|---------------------------------------------------------------------------------------------------------------|------------------------------------------------------------------------------------------------------------------------------------------------------------------------------------------|---|------|---|--------|---|------------|---|----------|
| 61 | <p>sympt_7_3</p> <p>Show the field ONLY if:<br/>[sympt_7] = "1" OR [sympt_7] = "2" OR [sympt_7] = "3"</p>     | <p>Details of the symptom<br/>(Can you describe the symptom in more detail?)</p> <p>(Sore throat)</p>         | <p>notes</p>                                                                                                                                                                             |   |      |   |        |   |            |   |          |
| 62 | <p>sympt_8</p> <p>Show the field ONLY if:<br/>[covid_1] = "1" OR [covid_1] = "3"</p>                          | <p>Cough</p>                                                                                                  | <p>radio</p> <table border="1"> <tr><td>0</td><td>0=no</td></tr> <tr><td>1</td><td>1=mild</td></tr> <tr><td>2</td><td>2=moderate</td></tr> <tr><td>3</td><td>3=severe</td></tr> </table> | 0 | 0=no | 1 | 1=mild | 2 | 2=moderate | 3 | 3=severe |
| 0  | 0=no                                                                                                          |                                                                                                               |                                                                                                                                                                                          |   |      |   |        |   |            |   |          |
| 1  | 1=mild                                                                                                        |                                                                                                               |                                                                                                                                                                                          |   |      |   |        |   |            |   |          |
| 2  | 2=moderate                                                                                                    |                                                                                                               |                                                                                                                                                                                          |   |      |   |        |   |            |   |          |
| 3  | 3=severe                                                                                                      |                                                                                                               |                                                                                                                                                                                          |   |      |   |        |   |            |   |          |
| 63 | <p>sympt_8_2</p> <p>Show the field ONLY if:<br/>[sympt_8] = "1" OR [sympt_8] = "2" OR [sympt_8] = "3"</p>     | <p>Duration of Symptom<br/>(in days)</p> <p>(Cough)</p>                                                       | <p>text (number)</p>                                                                                                                                                                     |   |      |   |        |   |            |   |          |
| 64 | <p>sympt_8_3</p> <p>Show the field ONLY if:<br/>[sympt_8] = "1" OR [sympt_8] = "2" OR [sympt_8] = "3"</p>     | <p>Details of the symptom<br/>(Can you describe the symptom in more detail?)</p> <p>(Cough)</p>               | <p>notes</p>                                                                                                                                                                             |   |      |   |        |   |            |   |          |
| 65 | <p>sympt_9</p> <p>Show the field ONLY if:<br/>[covid_1] = "1" OR [covid_1] = "3"</p>                          | <p>Shortness of breath</p>                                                                                    | <p>radio</p> <table border="1"> <tr><td>0</td><td>0=no</td></tr> <tr><td>1</td><td>1=mild</td></tr> <tr><td>2</td><td>2=moderate</td></tr> <tr><td>3</td><td>3=severe</td></tr> </table> | 0 | 0=no | 1 | 1=mild | 2 | 2=moderate | 3 | 3=severe |
| 0  | 0=no                                                                                                          |                                                                                                               |                                                                                                                                                                                          |   |      |   |        |   |            |   |          |
| 1  | 1=mild                                                                                                        |                                                                                                               |                                                                                                                                                                                          |   |      |   |        |   |            |   |          |
| 2  | 2=moderate                                                                                                    |                                                                                                               |                                                                                                                                                                                          |   |      |   |        |   |            |   |          |
| 3  | 3=severe                                                                                                      |                                                                                                               |                                                                                                                                                                                          |   |      |   |        |   |            |   |          |
| 66 | <p>sympt_9_2</p> <p>Show the field ONLY if:<br/>[sympt_9] = "1" OR [sympt_9] = "2" OR [sympt_9] = "3"</p>     | <p>Duration of Symptom<br/>(in days)</p> <p>(Shortness of breath)</p>                                         | <p>text (number)</p>                                                                                                                                                                     |   |      |   |        |   |            |   |          |
| 67 | <p>sympt_9_3</p> <p>Show the field ONLY if:<br/>[sympt_9] = "1" OR [sympt_9] = "2" OR [sympt_9] = "3"</p>     | <p>Details of the symptom<br/>(Can you describe the symptom in more detail?)</p> <p>(Shortness of breath)</p> | <p>notes</p>                                                                                                                                                                             |   |      |   |        |   |            |   |          |
| 68 | <p>sympt_10</p> <p>Show the field ONLY if:<br/>[covid_1] = "1" OR [covid_1] = "3"</p>                         | <p>Chest congestion</p>                                                                                       | <p>radio</p> <table border="1"> <tr><td>0</td><td>0=no</td></tr> <tr><td>1</td><td>1=mild</td></tr> <tr><td>2</td><td>2=moderate</td></tr> <tr><td>3</td><td>3=severe</td></tr> </table> | 0 | 0=no | 1 | 1=mild | 2 | 2=moderate | 3 | 3=severe |
| 0  | 0=no                                                                                                          |                                                                                                               |                                                                                                                                                                                          |   |      |   |        |   |            |   |          |
| 1  | 1=mild                                                                                                        |                                                                                                               |                                                                                                                                                                                          |   |      |   |        |   |            |   |          |
| 2  | 2=moderate                                                                                                    |                                                                                                               |                                                                                                                                                                                          |   |      |   |        |   |            |   |          |
| 3  | 3=severe                                                                                                      |                                                                                                               |                                                                                                                                                                                          |   |      |   |        |   |            |   |          |
| 69 | <p>sympt_10_2</p> <p>Show the field ONLY if:<br/>[sympt_10] = "1" OR [sympt_10] = "2" OR [sympt_10] = "3"</p> | <p>Duration of Symptom<br/>(in days)</p> <p>(Chest congestion)</p>                                            | <p>text (number)</p>                                                                                                                                                                     |   |      |   |        |   |            |   |          |
| 70 | <p>sympt_10_3</p> <p>Show the field ONLY if:<br/>[sympt_10] = "1" OR [sympt_10] = "2" OR [sympt_10] = "3"</p> | <p>Details of the symptom<br/>(Can you describe the symptom in more detail?)</p> <p>(Chest congestion)</p>    | <p>notes</p>                                                                                                                                                                             |   |      |   |        |   |            |   |          |

|    |                                                                                                               |                                                                                                                   |                                                                                                                                                                                          |   |      |   |        |   |            |   |          |
|----|---------------------------------------------------------------------------------------------------------------|-------------------------------------------------------------------------------------------------------------------|------------------------------------------------------------------------------------------------------------------------------------------------------------------------------------------|---|------|---|--------|---|------------|---|----------|
| 71 | <p>sympt_11</p> <p>Show the field ONLY if:<br/>[covid_1] = "1" OR [covid_1] = "3"</p>                         | <p>Temporary loss of taste</p>                                                                                    | <p>radio</p> <table border="1"> <tr><td>0</td><td>0=no</td></tr> <tr><td>1</td><td>1=mild</td></tr> <tr><td>2</td><td>2=moderate</td></tr> <tr><td>3</td><td>3=severe</td></tr> </table> | 0 | 0=no | 1 | 1=mild | 2 | 2=moderate | 3 | 3=severe |
| 0  | 0=no                                                                                                          |                                                                                                                   |                                                                                                                                                                                          |   |      |   |        |   |            |   |          |
| 1  | 1=mild                                                                                                        |                                                                                                                   |                                                                                                                                                                                          |   |      |   |        |   |            |   |          |
| 2  | 2=moderate                                                                                                    |                                                                                                                   |                                                                                                                                                                                          |   |      |   |        |   |            |   |          |
| 3  | 3=severe                                                                                                      |                                                                                                                   |                                                                                                                                                                                          |   |      |   |        |   |            |   |          |
| 72 | <p>sympt_11_2</p> <p>Show the field ONLY if:<br/>[sympt_11] = "1" OR [sympt_11] = "2" OR [sympt_11] = "3"</p> | <p>Duration of Symptom<br/>(in days)</p> <p>(Temporary loss of taste)</p>                                         | <p>text (number)</p>                                                                                                                                                                     |   |      |   |        |   |            |   |          |
| 73 | <p>sympt_11_3</p> <p>Show the field ONLY if:<br/>[sympt_11] = "1" OR [sympt_11] = "2" OR [sympt_11] = "3"</p> | <p>Details of the symptom<br/>(Can you describe the symptom in more detail?)</p> <p>(Temporary loss of taste)</p> | <p>notes</p>                                                                                                                                                                             |   |      |   |        |   |            |   |          |
| 74 | <p>sympt_12</p> <p>Show the field ONLY if:<br/>[covid_1] = "1" OR [covid_1] = "3"</p>                         | <p>Nausea</p>                                                                                                     | <p>radio</p> <table border="1"> <tr><td>0</td><td>0=no</td></tr> <tr><td>1</td><td>1=mild</td></tr> <tr><td>2</td><td>2=moderate</td></tr> <tr><td>3</td><td>3=severe</td></tr> </table> | 0 | 0=no | 1 | 1=mild | 2 | 2=moderate | 3 | 3=severe |
| 0  | 0=no                                                                                                          |                                                                                                                   |                                                                                                                                                                                          |   |      |   |        |   |            |   |          |
| 1  | 1=mild                                                                                                        |                                                                                                                   |                                                                                                                                                                                          |   |      |   |        |   |            |   |          |
| 2  | 2=moderate                                                                                                    |                                                                                                                   |                                                                                                                                                                                          |   |      |   |        |   |            |   |          |
| 3  | 3=severe                                                                                                      |                                                                                                                   |                                                                                                                                                                                          |   |      |   |        |   |            |   |          |
| 75 | <p>sympt_12_2</p> <p>Show the field ONLY if:<br/>[sympt_12] = "1" OR [sympt_12] = "2" OR [sympt_12] = "3"</p> | <p>Duration of Symptom<br/>(in days)</p> <p>(Nausea)</p>                                                          | <p>text (number)</p>                                                                                                                                                                     |   |      |   |        |   |            |   |          |
| 76 | <p>sympt_12_3</p> <p>Show the field ONLY if:<br/>[sympt_12] = "1" OR [sympt_12] = "2" OR [sympt_12] = "3"</p> | <p>Details of the symptom<br/>(Can you describe the symptom in more detail?)</p> <p>(Nausea)</p>                  | <p>notes</p>                                                                                                                                                                             |   |      |   |        |   |            |   |          |
| 77 | <p>sympt_13</p> <p>Show the field ONLY if:<br/>[covid_1] = "1" OR [covid_1] = "3"</p>                         | <p>Vomiting</p>                                                                                                   | <p>radio</p> <table border="1"> <tr><td>0</td><td>0=no</td></tr> <tr><td>1</td><td>1=mild</td></tr> <tr><td>2</td><td>2=moderate</td></tr> <tr><td>3</td><td>3=severe</td></tr> </table> | 0 | 0=no | 1 | 1=mild | 2 | 2=moderate | 3 | 3=severe |
| 0  | 0=no                                                                                                          |                                                                                                                   |                                                                                                                                                                                          |   |      |   |        |   |            |   |          |
| 1  | 1=mild                                                                                                        |                                                                                                                   |                                                                                                                                                                                          |   |      |   |        |   |            |   |          |
| 2  | 2=moderate                                                                                                    |                                                                                                                   |                                                                                                                                                                                          |   |      |   |        |   |            |   |          |
| 3  | 3=severe                                                                                                      |                                                                                                                   |                                                                                                                                                                                          |   |      |   |        |   |            |   |          |
| 78 | <p>sympt_13_2</p> <p>Show the field ONLY if:<br/>[sympt_13] = "1" OR [sympt_13] = "2" OR [sympt_13] = "3"</p> | <p>Duration of Symptom<br/>(in days)</p> <p>(Vomiting)</p>                                                        | <p>text (number)</p>                                                                                                                                                                     |   |      |   |        |   |            |   |          |
| 79 | <p>sympt_13_3</p> <p>Show the field ONLY if:<br/>[sympt_13] = "1" OR [sympt_13] = "2" OR [sympt_13] = "3"</p> | <p>Details of the symptom<br/>(Can you describe the symptom in more detail?)</p> <p>(Vomiting)</p>                | <p>notes</p>                                                                                                                                                                             |   |      |   |        |   |            |   |          |
| 80 | <p>sympt_14</p> <p>Show the field ONLY if:<br/>[covid_1] = "1" OR [covid_1] = "3"</p>                         | <p>Diarrhea</p>                                                                                                   | <p>radio</p> <table border="1"> <tr><td>0</td><td>0=no</td></tr> <tr><td>1</td><td>1=mild</td></tr> <tr><td>2</td><td>2=moderate</td></tr> <tr><td>3</td><td>3=severe</td></tr> </table> | 0 | 0=no | 1 | 1=mild | 2 | 2=moderate | 3 | 3=severe |
| 0  | 0=no                                                                                                          |                                                                                                                   |                                                                                                                                                                                          |   |      |   |        |   |            |   |          |
| 1  | 1=mild                                                                                                        |                                                                                                                   |                                                                                                                                                                                          |   |      |   |        |   |            |   |          |
| 2  | 2=moderate                                                                                                    |                                                                                                                   |                                                                                                                                                                                          |   |      |   |        |   |            |   |          |
| 3  | 3=severe                                                                                                      |                                                                                                                   |                                                                                                                                                                                          |   |      |   |        |   |            |   |          |
| 81 | <p>sympt_14_2</p> <p>Show the field ONLY if:<br/>[sympt_14] = "1" OR [sympt_14] = "2" OR [sympt_14] = "3"</p> | <p>Duration of Symptom<br/>(in days)</p> <p>(Diarrhea)</p>                                                        | <p>text (number)</p>                                                                                                                                                                     |   |      |   |        |   |            |   |          |

|    |                                                                                                               |                                                                                                                    |                                                                                                                                                                                          |   |      |   |        |   |            |   |          |
|----|---------------------------------------------------------------------------------------------------------------|--------------------------------------------------------------------------------------------------------------------|------------------------------------------------------------------------------------------------------------------------------------------------------------------------------------------|---|------|---|--------|---|------------|---|----------|
| 82 | <p>sympt_14_3</p> <p>Show the field ONLY if:<br/>[sympt_14] = "1" OR [sympt_14] = "2" OR [sympt_14] = "3"</p> | <p>Details of the symptom<br/>(Can you describe the symptom in more detail?)</p> <p>(Diarrhea)</p>                 | <p>notes</p>                                                                                                                                                                             |   |      |   |        |   |            |   |          |
| 83 | <p>sympt_15</p> <p>Show the field ONLY if:<br/>[covid_1] = "1" OR [covid_1] = "3"</p>                         | <p>Abdominal discomfort</p>                                                                                        | <p>radio</p> <table border="1"> <tr><td>0</td><td>0=no</td></tr> <tr><td>1</td><td>1=mild</td></tr> <tr><td>2</td><td>2=moderate</td></tr> <tr><td>3</td><td>3=severe</td></tr> </table> | 0 | 0=no | 1 | 1=mild | 2 | 2=moderate | 3 | 3=severe |
| 0  | 0=no                                                                                                          |                                                                                                                    |                                                                                                                                                                                          |   |      |   |        |   |            |   |          |
| 1  | 1=mild                                                                                                        |                                                                                                                    |                                                                                                                                                                                          |   |      |   |        |   |            |   |          |
| 2  | 2=moderate                                                                                                    |                                                                                                                    |                                                                                                                                                                                          |   |      |   |        |   |            |   |          |
| 3  | 3=severe                                                                                                      |                                                                                                                    |                                                                                                                                                                                          |   |      |   |        |   |            |   |          |
| 84 | <p>sympt_15_2</p> <p>Show the field ONLY if:<br/>[sympt_15] = "1" OR [sympt_15] = "2" OR [sympt_15] = "3"</p> | <p>Duration of Symptom<br/>(in days)</p> <p>(Abdominal discomfort)</p>                                             | <p>text (number)</p>                                                                                                                                                                     |   |      |   |        |   |            |   |          |
| 85 | <p>sympt_15_3</p> <p>Show the field ONLY if:<br/>[sympt_15] = "1" OR [sympt_15] = "2" OR [sympt_15] = "3"</p> | <p>Details of the symptom<br/>(Can you describe the symptom in more detail?)</p> <p>(Abdominal discomfort)</p>     | <p>notes</p>                                                                                                                                                                             |   |      |   |        |   |            |   |          |
| 86 | <p>sympt_16</p> <p>Show the field ONLY if:<br/>[covid_1] = "1" OR [covid_1] = "3"</p>                         | <p>Muscle or body ache/pain</p>                                                                                    | <p>radio</p> <table border="1"> <tr><td>0</td><td>0=no</td></tr> <tr><td>1</td><td>1=mild</td></tr> <tr><td>2</td><td>2=moderate</td></tr> <tr><td>3</td><td>3=severe</td></tr> </table> | 0 | 0=no | 1 | 1=mild | 2 | 2=moderate | 3 | 3=severe |
| 0  | 0=no                                                                                                          |                                                                                                                    |                                                                                                                                                                                          |   |      |   |        |   |            |   |          |
| 1  | 1=mild                                                                                                        |                                                                                                                    |                                                                                                                                                                                          |   |      |   |        |   |            |   |          |
| 2  | 2=moderate                                                                                                    |                                                                                                                    |                                                                                                                                                                                          |   |      |   |        |   |            |   |          |
| 3  | 3=severe                                                                                                      |                                                                                                                    |                                                                                                                                                                                          |   |      |   |        |   |            |   |          |
| 87 | <p>sympt_16_2</p> <p>Show the field ONLY if:<br/>[sympt_16] = "1" OR [sympt_16] = "2" OR [sympt_16] = "3"</p> | <p>Duration of Symptom<br/>(in days)</p> <p>(Muscle or body ache/pain)</p>                                         | <p>text (number)</p>                                                                                                                                                                     |   |      |   |        |   |            |   |          |
| 88 | <p>sympt_16_3</p> <p>Show the field ONLY if:<br/>[sympt_16] = "1" OR [sympt_16] = "2" OR [sympt_16] = "3"</p> | <p>Details of the symptom<br/>(Can you describe the symptom in more detail?)</p> <p>(Muscle or body ache/pain)</p> | <p>notes</p>                                                                                                                                                                             |   |      |   |        |   |            |   |          |
| 89 | <p>sympt_17</p> <p>Show the field ONLY if:<br/>[covid_1] = "1" OR [covid_1] = "3"</p>                         | <p>Dry skin</p>                                                                                                    | <p>radio</p> <table border="1"> <tr><td>0</td><td>0=no</td></tr> <tr><td>1</td><td>1=mild</td></tr> <tr><td>2</td><td>2=moderate</td></tr> <tr><td>3</td><td>3=severe</td></tr> </table> | 0 | 0=no | 1 | 1=mild | 2 | 2=moderate | 3 | 3=severe |
| 0  | 0=no                                                                                                          |                                                                                                                    |                                                                                                                                                                                          |   |      |   |        |   |            |   |          |
| 1  | 1=mild                                                                                                        |                                                                                                                    |                                                                                                                                                                                          |   |      |   |        |   |            |   |          |
| 2  | 2=moderate                                                                                                    |                                                                                                                    |                                                                                                                                                                                          |   |      |   |        |   |            |   |          |
| 3  | 3=severe                                                                                                      |                                                                                                                    |                                                                                                                                                                                          |   |      |   |        |   |            |   |          |
| 90 | <p>sympt_17_2</p> <p>Show the field ONLY if:<br/>[sympt_17] = "1" OR [sympt_17] = "2" OR [sympt_17] = "3"</p> | <p>Duration of Symptom<br/>(in days)</p> <p>(Dry skin)</p>                                                         | <p>text (number)</p>                                                                                                                                                                     |   |      |   |        |   |            |   |          |
| 91 | <p>sympt_17_3</p> <p>Show the field ONLY if:<br/>[sympt_17] = "1" OR [sympt_17] = "2" OR [sympt_17] = "3"</p> | <p>Details of the symptom<br/>(Can you describe the symptom in more detail?)</p> <p>(Dry skin)</p>                 | <p>notes</p>                                                                                                                                                                             |   |      |   |        |   |            |   |          |
| 92 | <p>sympt_18</p> <p>Show the field ONLY if:<br/>[covid_1] = "1" OR [covid_1] = "3"</p>                         | <p>Skin rash</p>                                                                                                   | <p>radio</p> <table border="1"> <tr><td>0</td><td>0=no</td></tr> <tr><td>1</td><td>1=mild</td></tr> <tr><td>2</td><td>2=moderate</td></tr> <tr><td>3</td><td>3=severe</td></tr> </table> | 0 | 0=no | 1 | 1=mild | 2 | 2=moderate | 3 | 3=severe |
| 0  | 0=no                                                                                                          |                                                                                                                    |                                                                                                                                                                                          |   |      |   |        |   |            |   |          |
| 1  | 1=mild                                                                                                        |                                                                                                                    |                                                                                                                                                                                          |   |      |   |        |   |            |   |          |
| 2  | 2=moderate                                                                                                    |                                                                                                                    |                                                                                                                                                                                          |   |      |   |        |   |            |   |          |
| 3  | 3=severe                                                                                                      |                                                                                                                    |                                                                                                                                                                                          |   |      |   |        |   |            |   |          |

|     |                                                                                                               |                                                                                                                  |                                                                                                                                                                                          |   |      |   |        |   |            |   |          |
|-----|---------------------------------------------------------------------------------------------------------------|------------------------------------------------------------------------------------------------------------------|------------------------------------------------------------------------------------------------------------------------------------------------------------------------------------------|---|------|---|--------|---|------------|---|----------|
| 93  | <p>sympt_18_2</p> <p>Show the field ONLY if:<br/>[sympt_18] = "1" OR [sympt_18] = "2" OR [sympt_18] = "3"</p> | <p>Duration of Symptom<br/>(in days)</p> <p>(Skin rash)</p>                                                      | <p>text (number)</p>                                                                                                                                                                     |   |      |   |        |   |            |   |          |
| 94  | <p>sympt_18_3</p> <p>Show the field ONLY if:<br/>[sympt_18] = "1" OR [sympt_18] = "2" OR [sympt_18] = "3"</p> | <p>Details of the symptom<br/>(Can you describe the symptom in more detail?)</p> <p>(Skin rash)</p>              | <p>notes</p>                                                                                                                                                                             |   |      |   |        |   |            |   |          |
| 95  | <p>sympt_19</p> <p>Show the field ONLY if:<br/>[covid_1] = "1" OR [covid_1] = "3"</p>                         | <p>Hair loss</p>                                                                                                 | <p>radio</p> <table border="1"> <tr><td>0</td><td>0=no</td></tr> <tr><td>1</td><td>1=mild</td></tr> <tr><td>2</td><td>2=moderate</td></tr> <tr><td>3</td><td>3=severe</td></tr> </table> | 0 | 0=no | 1 | 1=mild | 2 | 2=moderate | 3 | 3=severe |
| 0   | 0=no                                                                                                          |                                                                                                                  |                                                                                                                                                                                          |   |      |   |        |   |            |   |          |
| 1   | 1=mild                                                                                                        |                                                                                                                  |                                                                                                                                                                                          |   |      |   |        |   |            |   |          |
| 2   | 2=moderate                                                                                                    |                                                                                                                  |                                                                                                                                                                                          |   |      |   |        |   |            |   |          |
| 3   | 3=severe                                                                                                      |                                                                                                                  |                                                                                                                                                                                          |   |      |   |        |   |            |   |          |
| 96  | <p>sympt_19_2</p> <p>Show the field ONLY if:<br/>[sympt_19] = "1" OR [sympt_19] = "2" OR [sympt_19] = "3"</p> | <p>Duration of Symptom<br/>(in days)</p> <p>(Hair loss)</p>                                                      | <p>text (number)</p>                                                                                                                                                                     |   |      |   |        |   |            |   |          |
| 97  | <p>sympt_19_3</p> <p>Show the field ONLY if:<br/>[sympt_19] = "1" OR [sympt_19] = "2" OR [sympt_19] = "3"</p> | <p>Details of the symptom<br/>(Can you describe the symptom in more detail?)</p> <p>(Hair loss)</p>              | <p>notes</p>                                                                                                                                                                             |   |      |   |        |   |            |   |          |
| 98  | <p>sympt_20</p> <p>Show the field ONLY if:<br/>[covid_1] = "1" OR [covid_1] = "3"</p>                         | <p>Headache</p>                                                                                                  | <p>radio</p> <table border="1"> <tr><td>0</td><td>0=no</td></tr> <tr><td>1</td><td>1=mild</td></tr> <tr><td>2</td><td>2=moderate</td></tr> <tr><td>3</td><td>3=severe</td></tr> </table> | 0 | 0=no | 1 | 1=mild | 2 | 2=moderate | 3 | 3=severe |
| 0   | 0=no                                                                                                          |                                                                                                                  |                                                                                                                                                                                          |   |      |   |        |   |            |   |          |
| 1   | 1=mild                                                                                                        |                                                                                                                  |                                                                                                                                                                                          |   |      |   |        |   |            |   |          |
| 2   | 2=moderate                                                                                                    |                                                                                                                  |                                                                                                                                                                                          |   |      |   |        |   |            |   |          |
| 3   | 3=severe                                                                                                      |                                                                                                                  |                                                                                                                                                                                          |   |      |   |        |   |            |   |          |
| 99  | <p>sympt_20_2</p> <p>Show the field ONLY if:<br/>[sympt_20] = "1" OR [sympt_20] = "2" OR [sympt_20] = "3"</p> | <p>Duration of Symptom<br/>(in days)</p> <p>(Headache)</p>                                                       | <p>text (number)</p>                                                                                                                                                                     |   |      |   |        |   |            |   |          |
| 100 | <p>sympt_20_3</p> <p>Show the field ONLY if:<br/>[sympt_20] = "1" OR [sympt_20] = "2" OR [sympt_20] = "3"</p> | <p>Details of the symptom<br/>(Can you describe the symptom in more detail?)</p> <p>(Headache)</p>               | <p>notes</p>                                                                                                                                                                             |   |      |   |        |   |            |   |          |
| 101 | <p>sympt_21</p> <p>Show the field ONLY if:<br/>[covid_1] = "1" OR [covid_1] = "3"</p>                         | <p>Weight loss</p>                                                                                               | <p>radio</p> <table border="1"> <tr><td>0</td><td>0=no</td></tr> <tr><td>1</td><td>1=mild</td></tr> <tr><td>2</td><td>2=moderate</td></tr> <tr><td>3</td><td>3=severe</td></tr> </table> | 0 | 0=no | 1 | 1=mild | 2 | 2=moderate | 3 | 3=severe |
| 0   | 0=no                                                                                                          |                                                                                                                  |                                                                                                                                                                                          |   |      |   |        |   |            |   |          |
| 1   | 1=mild                                                                                                        |                                                                                                                  |                                                                                                                                                                                          |   |      |   |        |   |            |   |          |
| 2   | 2=moderate                                                                                                    |                                                                                                                  |                                                                                                                                                                                          |   |      |   |        |   |            |   |          |
| 3   | 3=severe                                                                                                      |                                                                                                                  |                                                                                                                                                                                          |   |      |   |        |   |            |   |          |
| 102 | <p>sympt_21_2</p> <p>Show the field ONLY if:<br/>[sympt_21] = "1" OR [sympt_21] = "2" OR [sympt_21] = "3"</p> | <p>Duration of Symptom<br/>(in days)</p> <p>(Weight loss)</p>                                                    | <p>text (number)</p>                                                                                                                                                                     |   |      |   |        |   |            |   |          |
| 103 | <p>sympt_21_3</p> <p>Show the field ONLY if:<br/>[sympt_21] = "1" OR [sympt_21] = "2" OR [sympt_21] = "3"</p> | <p>Details of the symptom<br/>(Can you describe the symptom in more detail?)</p> <p>?lb</p> <p>(Weight loss)</p> | <p>notes</p>                                                                                                                                                                             |   |      |   |        |   |            |   |          |

|     |                                                                                                               |                                                                                                                                                              |                                                                                                                                                                                                                                                               |   |               |               |        |               |            |   |               |                                         |
|-----|---------------------------------------------------------------------------------------------------------------|--------------------------------------------------------------------------------------------------------------------------------------------------------------|---------------------------------------------------------------------------------------------------------------------------------------------------------------------------------------------------------------------------------------------------------------|---|---------------|---------------|--------|---------------|------------|---|---------------|-----------------------------------------|
| 104 | <p>sympt_22</p> <p>Show the field ONLY if:<br/>[covid_1] = "1" OR [covid_1] = "3"</p>                         | <p>Urinary issues</p>                                                                                                                                        | <p>radio</p> <table border="1"> <tr><td>0</td><td>0=no</td></tr> <tr><td>1</td><td>1=mild</td></tr> <tr><td>2</td><td>2=moderate</td></tr> <tr><td>3</td><td>3=severe</td></tr> </table>                                                                      | 0 | 0=no          | 1             | 1=mild | 2             | 2=moderate | 3 | 3=severe      |                                         |
| 0   | 0=no                                                                                                          |                                                                                                                                                              |                                                                                                                                                                                                                                                               |   |               |               |        |               |            |   |               |                                         |
| 1   | 1=mild                                                                                                        |                                                                                                                                                              |                                                                                                                                                                                                                                                               |   |               |               |        |               |            |   |               |                                         |
| 2   | 2=moderate                                                                                                    |                                                                                                                                                              |                                                                                                                                                                                                                                                               |   |               |               |        |               |            |   |               |                                         |
| 3   | 3=severe                                                                                                      |                                                                                                                                                              |                                                                                                                                                                                                                                                               |   |               |               |        |               |            |   |               |                                         |
| 105 | <p>sympt_22_2</p> <p>Show the field ONLY if:<br/>[sympt_22] = "1" OR [sympt_22] = "2" OR [sympt_22] = "3"</p> | <p>Duration of Symptom (in days)</p> <p>(Urinary issues)</p>                                                                                                 | <p>text (number)</p>                                                                                                                                                                                                                                          |   |               |               |        |               |            |   |               |                                         |
| 106 | <p>sympt_22_3</p> <p>Show the field ONLY if:<br/>[sympt_22] = "1" OR [sympt_22] = "2" OR [sympt_22] = "3"</p> | <p>Details of the symptom (Can you describe the symptom in more detail?)</p> <p>(Urinary issues)</p>                                                         | <p>checkbox</p> <table border="1"> <tr><td>1</td><td>sympt_22_3__1</td><td>incontinence</td></tr> <tr><td>2</td><td>sympt_22_3__2</td><td>urgency</td></tr> <tr><td>3</td><td>sympt_22_3__3</td><td>frequency</td></tr> </table>                              | 1 | sympt_22_3__1 | incontinence  | 2      | sympt_22_3__2 | urgency    | 3 | sympt_22_3__3 | frequency                               |
| 1   | sympt_22_3__1                                                                                                 | incontinence                                                                                                                                                 |                                                                                                                                                                                                                                                               |   |               |               |        |               |            |   |               |                                         |
| 2   | sympt_22_3__2                                                                                                 | urgency                                                                                                                                                      |                                                                                                                                                                                                                                                               |   |               |               |        |               |            |   |               |                                         |
| 3   | sympt_22_3__3                                                                                                 | frequency                                                                                                                                                    |                                                                                                                                                                                                                                                               |   |               |               |        |               |            |   |               |                                         |
| 107 | <p>neuro_1</p> <p>Show the field ONLY if:<br/>[covid_1] = "1" OR [covid_1] = "3"</p>                          | <p>Section Header: (Neuro COVID symptoms) Have you experienced any of the following new symptoms during your COVID/ COVID-like illness?</p> <p>Dizziness</p> | <p>radio</p> <table border="1"> <tr><td>0</td><td>0=no</td></tr> <tr><td>1</td><td>1=mild</td></tr> <tr><td>2</td><td>2=moderate</td></tr> <tr><td>3</td><td>3=severe</td></tr> </table>                                                                      | 0 | 0=no          | 1             | 1=mild | 2             | 2=moderate | 3 | 3=severe      |                                         |
| 0   | 0=no                                                                                                          |                                                                                                                                                              |                                                                                                                                                                                                                                                               |   |               |               |        |               |            |   |               |                                         |
| 1   | 1=mild                                                                                                        |                                                                                                                                                              |                                                                                                                                                                                                                                                               |   |               |               |        |               |            |   |               |                                         |
| 2   | 2=moderate                                                                                                    |                                                                                                                                                              |                                                                                                                                                                                                                                                               |   |               |               |        |               |            |   |               |                                         |
| 3   | 3=severe                                                                                                      |                                                                                                                                                              |                                                                                                                                                                                                                                                               |   |               |               |        |               |            |   |               |                                         |
| 108 | <p>neuro_1_2</p> <p>Show the field ONLY if:<br/>[neuro_1] = "1" OR [neuro_1] = "2" OR [neuro_1] = "3"</p>     | <p>Duration of Symptom (in days)</p> <p>(Dizziness)</p>                                                                                                      | <p>text (number)</p>                                                                                                                                                                                                                                          |   |               |               |        |               |            |   |               |                                         |
| 109 | <p>neuro_1_3</p> <p>Show the field ONLY if:<br/>[neuro_1] = "1" OR [neuro_1] = "2" OR [neuro_1] = "3"</p>     | <p>Details of the symptom (Can you describe the symptom in more detail?)</p> <p>(Dizziness)</p>                                                              | <p>checkbox</p> <table border="1"> <tr><td>1</td><td>neuro_1_3__1</td><td>head spinning</td></tr> <tr><td>2</td><td>neuro_1_3__2</td><td>waviness</td></tr> <tr><td>3</td><td>neuro_1_3__3</td><td>lightheadedness upon changing positions</td></tr> </table> | 1 | neuro_1_3__1  | head spinning | 2      | neuro_1_3__2  | waviness   | 3 | neuro_1_3__3  | lightheadedness upon changing positions |
| 1   | neuro_1_3__1                                                                                                  | head spinning                                                                                                                                                |                                                                                                                                                                                                                                                               |   |               |               |        |               |            |   |               |                                         |
| 2   | neuro_1_3__2                                                                                                  | waviness                                                                                                                                                     |                                                                                                                                                                                                                                                               |   |               |               |        |               |            |   |               |                                         |
| 3   | neuro_1_3__3                                                                                                  | lightheadedness upon changing positions                                                                                                                      |                                                                                                                                                                                                                                                               |   |               |               |        |               |            |   |               |                                         |
| 110 | <p>neuro_2</p> <p>Show the field ONLY if:<br/>[covid_1] = "1" OR [covid_1] = "3"</p>                          | <p>Temporary loss of hearing</p>                                                                                                                             | <p>radio</p> <table border="1"> <tr><td>0</td><td>0=no</td></tr> <tr><td>1</td><td>1=mild</td></tr> <tr><td>2</td><td>2=moderate</td></tr> <tr><td>3</td><td>3=severe</td></tr> </table>                                                                      | 0 | 0=no          | 1             | 1=mild | 2             | 2=moderate | 3 | 3=severe      |                                         |
| 0   | 0=no                                                                                                          |                                                                                                                                                              |                                                                                                                                                                                                                                                               |   |               |               |        |               |            |   |               |                                         |
| 1   | 1=mild                                                                                                        |                                                                                                                                                              |                                                                                                                                                                                                                                                               |   |               |               |        |               |            |   |               |                                         |
| 2   | 2=moderate                                                                                                    |                                                                                                                                                              |                                                                                                                                                                                                                                                               |   |               |               |        |               |            |   |               |                                         |
| 3   | 3=severe                                                                                                      |                                                                                                                                                              |                                                                                                                                                                                                                                                               |   |               |               |        |               |            |   |               |                                         |
| 111 | <p>neuro_2_2</p> <p>Show the field ONLY if:<br/>[neuro_2] = "1" OR [neuro_2] = "2" OR [neuro_2] = "3"</p>     | <p>Duration of Symptom (in days)</p> <p>(Temporary loss of hearing)</p>                                                                                      | <p>text (number)</p>                                                                                                                                                                                                                                          |   |               |               |        |               |            |   |               |                                         |
| 112 | <p>neuro_2_3</p> <p>Show the field ONLY if:<br/>[neuro_2] = "1" OR [neuro_2] = "2" OR [neuro_2] = "3"</p>     | <p>Details of the symptom (Can you describe the symptom in more detail?)</p> <p>(Temporary loss of hearing)</p>                                              | <p>notes</p>                                                                                                                                                                                                                                                  |   |               |               |        |               |            |   |               |                                         |
| 113 | <p>neuro_3</p> <p>Show the field ONLY if:<br/>[covid_1] = "1" OR [covid_1] = "3"</p>                          | <p>Tinnitus (Ringing in the ears)</p>                                                                                                                        | <p>radio</p> <table border="1"> <tr><td>0</td><td>0=no</td></tr> <tr><td>1</td><td>1=mild</td></tr> <tr><td>2</td><td>2=moderate</td></tr> <tr><td>3</td><td>3=severe</td></tr> </table>                                                                      | 0 | 0=no          | 1             | 1=mild | 2             | 2=moderate | 3 | 3=severe      |                                         |
| 0   | 0=no                                                                                                          |                                                                                                                                                              |                                                                                                                                                                                                                                                               |   |               |               |        |               |            |   |               |                                         |
| 1   | 1=mild                                                                                                        |                                                                                                                                                              |                                                                                                                                                                                                                                                               |   |               |               |        |               |            |   |               |                                         |
| 2   | 2=moderate                                                                                                    |                                                                                                                                                              |                                                                                                                                                                                                                                                               |   |               |               |        |               |            |   |               |                                         |
| 3   | 3=severe                                                                                                      |                                                                                                                                                              |                                                                                                                                                                                                                                                               |   |               |               |        |               |            |   |               |                                         |
| 114 | <p>neuro_3_2</p> <p>Show the field ONLY if:<br/>[neuro_3] = "1" OR [neuro_3] = "2" OR [neuro_3] = "3"</p>     | <p>Duration of Symptom (in days)</p> <p>(Tinnitus [Ringing in the ears])</p>                                                                                 | <p>text (number)</p>                                                                                                                                                                                                                                          |   |               |               |        |               |            |   |               |                                         |



|     |                                                                                               |                                                                                                                  |                                                                                                                                                                                      |   |      |   |        |   |            |   |          |
|-----|-----------------------------------------------------------------------------------------------|------------------------------------------------------------------------------------------------------------------|--------------------------------------------------------------------------------------------------------------------------------------------------------------------------------------|---|------|---|--------|---|------------|---|----------|
| 115 | neuro_3_3<br>Show the field ONLY if:<br>[neuro_3] = "1" OR [neuro_3] = "2" OR [neuro_3] = "3" | Details of the symptom<br>(Can you describe the symptom in more detail?)<br><br>(Tinnitus [Ringing in the ears]) | notes                                                                                                                                                                                |   |      |   |        |   |            |   |          |
| 116 | neuro_4<br>Show the field ONLY if:<br>[covid_1] = "1" OR [covid_1] = "3"                      | Visual changes                                                                                                   | radio<br><table border="1"> <tr><td>0</td><td>0=no</td></tr> <tr><td>1</td><td>1=mild</td></tr> <tr><td>2</td><td>2=moderate</td></tr> <tr><td>3</td><td>3=severe</td></tr> </table> | 0 | 0=no | 1 | 1=mild | 2 | 2=moderate | 3 | 3=severe |
| 0   | 0=no                                                                                          |                                                                                                                  |                                                                                                                                                                                      |   |      |   |        |   |            |   |          |
| 1   | 1=mild                                                                                        |                                                                                                                  |                                                                                                                                                                                      |   |      |   |        |   |            |   |          |
| 2   | 2=moderate                                                                                    |                                                                                                                  |                                                                                                                                                                                      |   |      |   |        |   |            |   |          |
| 3   | 3=severe                                                                                      |                                                                                                                  |                                                                                                                                                                                      |   |      |   |        |   |            |   |          |
| 117 | neuro_4_2<br>Show the field ONLY if:<br>[neuro_4] = "1" OR [neuro_4] = "2" OR [neuro_4] = "3" | Duration of Symptom<br>(in days)<br><br>(Visual changes)                                                         | text (number)                                                                                                                                                                        |   |      |   |        |   |            |   |          |
| 118 | neuro_4_3<br>Show the field ONLY if:<br>[neuro_4] = "1" OR [neuro_4] = "2" OR [neuro_4] = "3" | Details of the symptom<br>(Can you describe the symptom in more detail?)<br><br>(Visual changes)                 | notes                                                                                                                                                                                |   |      |   |        |   |            |   |          |
| 119 | neuro_5<br>Show the field ONLY if:<br>[covid_1] = "1" OR [covid_1] = "3"                      | Double vision                                                                                                    | radio<br><table border="1"> <tr><td>0</td><td>0=no</td></tr> <tr><td>1</td><td>1=mild</td></tr> <tr><td>2</td><td>2=moderate</td></tr> <tr><td>3</td><td>3=severe</td></tr> </table> | 0 | 0=no | 1 | 1=mild | 2 | 2=moderate | 3 | 3=severe |
| 0   | 0=no                                                                                          |                                                                                                                  |                                                                                                                                                                                      |   |      |   |        |   |            |   |          |
| 1   | 1=mild                                                                                        |                                                                                                                  |                                                                                                                                                                                      |   |      |   |        |   |            |   |          |
| 2   | 2=moderate                                                                                    |                                                                                                                  |                                                                                                                                                                                      |   |      |   |        |   |            |   |          |
| 3   | 3=severe                                                                                      |                                                                                                                  |                                                                                                                                                                                      |   |      |   |        |   |            |   |          |
| 120 | neuro_5_2<br>Show the field ONLY if:<br>[neuro_5] = "1" OR [neuro_5] = "2" OR [neuro_5] = "3" | Duration of Symptom<br>(in days)<br><br>(Double vision)                                                          | text (number)                                                                                                                                                                        |   |      |   |        |   |            |   |          |
| 121 | neuro_5_3<br>Show the field ONLY if:<br>[neuro_5] = "1" OR [neuro_5] = "2" OR [neuro_5] = "3" | Details of the symptom<br>(Can you describe the symptom in more detail?)<br><br>(Double vision)                  | notes                                                                                                                                                                                |   |      |   |        |   |            |   |          |
| 122 | neuro_6<br>Show the field ONLY if:<br>[covid_1] = "1" OR [covid_1] = "3"                      | Facial twitches                                                                                                  | radio<br><table border="1"> <tr><td>0</td><td>0=no</td></tr> <tr><td>1</td><td>1=mild</td></tr> <tr><td>2</td><td>2=moderate</td></tr> <tr><td>3</td><td>3=severe</td></tr> </table> | 0 | 0=no | 1 | 1=mild | 2 | 2=moderate | 3 | 3=severe |
| 0   | 0=no                                                                                          |                                                                                                                  |                                                                                                                                                                                      |   |      |   |        |   |            |   |          |
| 1   | 1=mild                                                                                        |                                                                                                                  |                                                                                                                                                                                      |   |      |   |        |   |            |   |          |
| 2   | 2=moderate                                                                                    |                                                                                                                  |                                                                                                                                                                                      |   |      |   |        |   |            |   |          |
| 3   | 3=severe                                                                                      |                                                                                                                  |                                                                                                                                                                                      |   |      |   |        |   |            |   |          |
| 123 | neuro_6_2<br>Show the field ONLY if:<br>[neuro_6] = "1" OR [neuro_6] = "2" OR [neuro_6] = "3" | Duration of Symptom<br>(in days)<br><br>(Facial twitches)                                                        | text (number)                                                                                                                                                                        |   |      |   |        |   |            |   |          |
| 124 | neuro_6_3<br>Show the field ONLY if:<br>[neuro_6] = "1" OR [neuro_6] = "2" OR [neuro_6] = "3" | Details of the symptom<br>(Can you describe the symptom in more detail?)<br><br>(Facial twitches)                | notes                                                                                                                                                                                |   |      |   |        |   |            |   |          |

|     |                                                                                                   |                                                                                                       |                                                           |
|-----|---------------------------------------------------------------------------------------------------|-------------------------------------------------------------------------------------------------------|-----------------------------------------------------------|
| 125 | neuro_7<br>Show the field ONLY if:<br>[covid_1] = "1" OR [covid_1] = "3"                          | Body/Arms/Leg twitches                                                                                | radio<br>0 0=no<br>1 1=mild<br>2 2=moderate<br>3 3=severe |
| 126 | neuro_7_2<br>Show the field ONLY if:<br>[neuro_7] = "1" OR [neuro_7] = "2" OR [neuro_7] = "3"     | Duration of Symptom (in days)<br><br>(Body/Arms/Leg twitches)                                         | text (number)                                             |
| 127 | neuro_7_3<br>Show the field ONLY if:<br>[neuro_7] = "1" OR [neuro_7] = "2" OR [neuro_7] = "3"     | Details of the symptom (Can you describe the symptom in more detail?)<br><br>(Body/Arms/Leg twitches) | notes                                                     |
| 128 | neuro_8<br>Show the field ONLY if:<br>[covid_1] = "1" OR [covid_1] = "3"                          | Seizure                                                                                               | radio<br>0 0=no<br>1 1=mild<br>2 2=moderate<br>3 3=severe |
| 129 | neuro_8_2<br>Show the field ONLY if:<br>[neuro_8] = "1" OR [neuro_8] = "2" OR [neuro_8] = "3"     | Duration of Symptom (in days)<br><br>(Seizure)                                                        | text (number)                                             |
| 130 | neuro_8_3<br>Show the field ONLY if:<br>[neuro_8] = "1" OR [neuro_8] = "2" OR [neuro_8] = "3"     | Details of the symptom (Can you describe the symptom in more detail?)<br><br>(Seizure)                | notes                                                     |
| 131 | neuro_9<br>Show the field ONLY if:<br>[covid_1] = "1" OR [covid_1] = "3"                          | Loss of consciousness                                                                                 | radio<br>0 0=no<br>1 1=mild<br>2 2=moderate<br>3 3=severe |
| 132 | neuro_9_2<br>Show the field ONLY if:<br>[neuro_9] = "1" OR [neuro_9] = "2" OR [neuro_9] = "3"     | Duration of Symptom (in days)<br><br>(Loss of consciousness)                                          | text (number)                                             |
| 133 | neuro_9_3<br>Show the field ONLY if:<br>[neuro_9] = "1" OR [neuro_9] = "2" OR [neuro_9] = "3"     | Details of the symptom (Can you describe the symptom in more detail?)<br><br>(Loss of consciousness)  | notes                                                     |
| 134 | neuro_10<br>Show the field ONLY if:<br>[covid_1] = "1" OR [covid_1] = "3"                         | Confusion                                                                                             | radio<br>0 0=no<br>1 1=mild<br>2 2=moderate<br>3 3=severe |
| 135 | neuro_10_2<br>Show the field ONLY if:<br>[neuro_10] = "1" OR [neuro_10] = "2" OR [neuro_10] = "3" | Duration of Symptom (in days)<br><br>(Confusion)                                                      | text (number)                                             |

|     |                                                                                                   |                                                                                                                              |                                                           |
|-----|---------------------------------------------------------------------------------------------------|------------------------------------------------------------------------------------------------------------------------------|-----------------------------------------------------------|
| 136 | neuro_10_3<br>Show the field ONLY if:<br>[neuro_10] = "1" OR [neuro_10] = "2" OR [neuro_10] = "3" | Details of the symptom<br>(Can you describe the symptom in more detail?)<br><br>(Confusion)                                  | radio<br>1 Intermittent<br>2 Constant during illness      |
| 137 | neuro_11<br>Show the field ONLY if:<br>[covid_1] = "1" OR [covid_1] = "3"                         | Memory Loss                                                                                                                  | radio<br>0 0=no<br>1 1=mild<br>2 2=moderate<br>3 3=severe |
| 138 | neuro_11_2<br>Show the field ONLY if:<br>[neuro_11] = "1" OR [neuro_11] = "2" OR [neuro_11] = "3" | Duration of Symptom<br>(in days)<br><br>(Memory loss)                                                                        | text (number)                                             |
| 139 | neuro_11_3<br>Show the field ONLY if:<br>[neuro_11] = "1" OR [neuro_11] = "2" OR [neuro_11] = "3" | Details of the symptom<br>(Can you describe the symptom in more detail?)<br><br>(Memory loss)                                | radio<br>1 Temporary<br>2 Since                           |
| 140 | neuro_12<br>Show the field ONLY if:<br>[covid_1] = "1" OR [covid_1] = "3"                         | Hallucinations                                                                                                               | radio<br>0 0=no<br>1 1=mild<br>2 2=moderate<br>3 3=severe |
| 141 | neuro_12_2<br>Show the field ONLY if:<br>[neuro_12] = "1" OR [neuro_12] = "2" OR [neuro_12] = "3" | Duration of Symptom<br>(in days)<br><br>(Hallucinations)                                                                     | text (number)                                             |
| 142 | neuro_12_3<br>Show the field ONLY if:<br>[neuro_12] = "1" OR [neuro_12] = "2" OR [neuro_12] = "3" | Details of the symptom<br>(Can you describe the symptom in more detail?)<br>(Type of hallucinations)<br><br>(Hallucinations) | notes                                                     |
| 143 | neuro_13<br>Show the field ONLY if:<br>[covid_1] = "1" OR [covid_1] = "3"                         | Nerve pain                                                                                                                   | radio<br>0 0=no<br>1 1=mild<br>2 2=moderate<br>3 3=severe |
| 144 | neuro_13_2<br>Show the field ONLY if:<br>[neuro_13] = "1" OR [neuro_13] = "2" OR [neuro_13] = "3" | Duration of Symptom<br>(in days)<br><br>(Nerve pain)                                                                         | text (number)                                             |
| 145 | neuro_13_3<br>Show the field ONLY if:<br>[neuro_13] = "1" OR [neuro_13] = "2" OR [neuro_13] = "3" | Details of the symptom<br>(Can you describe the symptom in more detail?)<br><br>(Nerve pain)                                 | notes                                                     |
| 146 | neuro_14<br>Show the field ONLY if:<br>[covid_1] = "1" OR [covid_1] = "3"                         | Numbness/tingling                                                                                                            | radio<br>0 0=no<br>1 1=mild<br>2 2=moderate<br>3 3=severe |

|     |                                                                                                   |                                                                                                  |                                                                                                                                                                                                               |   |               |      |        |               |            |   |               |      |
|-----|---------------------------------------------------------------------------------------------------|--------------------------------------------------------------------------------------------------|---------------------------------------------------------------------------------------------------------------------------------------------------------------------------------------------------------------|---|---------------|------|--------|---------------|------------|---|---------------|------|
| 147 | neuro_14_2<br>Show the field ONLY if:<br>[neuro_14] = "1" OR [neuro_14] = "2" OR [neuro_14] = "3" | Duration of Symptom (in days)<br><br>(Numbness/tingling)                                         | text (number)                                                                                                                                                                                                 |   |               |      |        |               |            |   |               |      |
| 148 | neuro_14_3<br>Show the field ONLY if:<br>[neuro_14] = "1" OR [neuro_14] = "2" OR [neuro_14] = "3" | Details of the symptom (Can you describe the symptom in more detail?)<br><br>(Numbness/tingling) | notes                                                                                                                                                                                                         |   |               |      |        |               |            |   |               |      |
| 149 | neuro_15<br>Show the field ONLY if:<br>[covid_1] = "1" OR [covid_1] = "3"                         | Loss of sensation                                                                                | radio<br><table border="1"> <tr><td>0</td><td>0=no</td></tr> <tr><td>1</td><td>1=mild</td></tr> <tr><td>2</td><td>2=moderate</td></tr> <tr><td>3</td><td>3=severe</td></tr> </table>                          | 0 | 0=no          | 1    | 1=mild | 2             | 2=moderate | 3 | 3=severe      |      |
| 0   | 0=no                                                                                              |                                                                                                  |                                                                                                                                                                                                               |   |               |      |        |               |            |   |               |      |
| 1   | 1=mild                                                                                            |                                                                                                  |                                                                                                                                                                                                               |   |               |      |        |               |            |   |               |      |
| 2   | 2=moderate                                                                                        |                                                                                                  |                                                                                                                                                                                                               |   |               |      |        |               |            |   |               |      |
| 3   | 3=severe                                                                                          |                                                                                                  |                                                                                                                                                                                                               |   |               |      |        |               |            |   |               |      |
| 150 | neuro_15_2<br>Show the field ONLY if:<br>[neuro_15] = "1" OR [neuro_15] = "2" OR [neuro_15] = "3" | Duration of Symptom (in days)<br><br>(Loss of sensation)                                         | text (number)                                                                                                                                                                                                 |   |               |      |        |               |            |   |               |      |
| 151 | neuro_15_3<br>Show the field ONLY if:<br>[neuro_15] = "1" OR [neuro_15] = "2" OR [neuro_15] = "3" | Details of the symptom (Can you describe the symptom in more detail?)<br><br>(Loss of sensation) | checkbox<br><table border="1"> <tr><td>1</td><td>neuro_15_3__1</td><td>Pain</td></tr> <tr><td>2</td><td>neuro_15_3__2</td><td>Touch</td></tr> <tr><td>3</td><td>neuro_15_3__3</td><td>Temp</td></tr> </table> | 1 | neuro_15_3__1 | Pain | 2      | neuro_15_3__2 | Touch      | 3 | neuro_15_3__3 | Temp |
| 1   | neuro_15_3__1                                                                                     | Pain                                                                                             |                                                                                                                                                                                                               |   |               |      |        |               |            |   |               |      |
| 2   | neuro_15_3__2                                                                                     | Touch                                                                                            |                                                                                                                                                                                                               |   |               |      |        |               |            |   |               |      |
| 3   | neuro_15_3__3                                                                                     | Temp                                                                                             |                                                                                                                                                                                                               |   |               |      |        |               |            |   |               |      |
| 152 | neuro_16<br>Show the field ONLY if:<br>[covid_1] = "1" OR [covid_1] = "3"                         | Weakness                                                                                         | radio<br><table border="1"> <tr><td>0</td><td>0=no</td></tr> <tr><td>1</td><td>1=mild</td></tr> <tr><td>2</td><td>2=moderate</td></tr> <tr><td>3</td><td>3=severe</td></tr> </table>                          | 0 | 0=no          | 1    | 1=mild | 2             | 2=moderate | 3 | 3=severe      |      |
| 0   | 0=no                                                                                              |                                                                                                  |                                                                                                                                                                                                               |   |               |      |        |               |            |   |               |      |
| 1   | 1=mild                                                                                            |                                                                                                  |                                                                                                                                                                                                               |   |               |      |        |               |            |   |               |      |
| 2   | 2=moderate                                                                                        |                                                                                                  |                                                                                                                                                                                                               |   |               |      |        |               |            |   |               |      |
| 3   | 3=severe                                                                                          |                                                                                                  |                                                                                                                                                                                                               |   |               |      |        |               |            |   |               |      |
| 153 | neuro_16_2<br>Show the field ONLY if:<br>[neuro_16] = "1" OR [neuro_16] = "2" OR [neuro_16] = "3" | Duration of Symptom (in days)<br><br>(Weakness)                                                  | text (number)                                                                                                                                                                                                 |   |               |      |        |               |            |   |               |      |
| 154 | neuro_16_3<br>Show the field ONLY if:<br>[neuro_16] = "1" OR [neuro_16] = "2" OR [neuro_16] = "3" | Details of the symptom (Can you describe the symptom in more detail?) (Where?)<br><br>(Weakness) | notes                                                                                                                                                                                                         |   |               |      |        |               |            |   |               |      |
| 155 | neuro_17<br>Show the field ONLY if:<br>[covid_1] = "1" OR [covid_1] = "3"                         | Tremor                                                                                           | radio<br><table border="1"> <tr><td>0</td><td>0=no</td></tr> <tr><td>1</td><td>1=mild</td></tr> <tr><td>2</td><td>2=moderate</td></tr> <tr><td>3</td><td>3=severe</td></tr> </table>                          | 0 | 0=no          | 1    | 1=mild | 2             | 2=moderate | 3 | 3=severe      |      |
| 0   | 0=no                                                                                              |                                                                                                  |                                                                                                                                                                                                               |   |               |      |        |               |            |   |               |      |
| 1   | 1=mild                                                                                            |                                                                                                  |                                                                                                                                                                                                               |   |               |      |        |               |            |   |               |      |
| 2   | 2=moderate                                                                                        |                                                                                                  |                                                                                                                                                                                                               |   |               |      |        |               |            |   |               |      |
| 3   | 3=severe                                                                                          |                                                                                                  |                                                                                                                                                                                                               |   |               |      |        |               |            |   |               |      |
| 156 | neuro_17_2<br>Show the field ONLY if:<br>[neuro_17] = "1" OR [neuro_17] = "2" OR [neuro_17] = "3" | Duration of Symptom (in days)<br><br>(Tremor)                                                    | text (number)                                                                                                                                                                                                 |   |               |      |        |               |            |   |               |      |
| 157 | neuro_17_3<br>Show the field ONLY if:<br>[neuro_17] = "1" OR [neuro_17] = "2" OR [neuro_17] = "3" | Details of the symptom (Can you describe the symptom in more detail?)<br><br>(Tremor)            | notes                                                                                                                                                                                                         |   |               |      |        |               |            |   |               |      |

|     |                                                                                                   |                                                                                                                 |                                                           |
|-----|---------------------------------------------------------------------------------------------------|-----------------------------------------------------------------------------------------------------------------|-----------------------------------------------------------|
| 158 | neuro_18<br>Show the field ONLY if:<br>[covid_1] = "1" OR [covid_1] = "3"                         | Rigidity                                                                                                        | radio<br>0 0=no<br>1 1=mild<br>2 2=moderate<br>3 3=severe |
| 159 | neuro_18_2<br>Show the field ONLY if:<br>[neuro_18] = "1" OR [neuro_18] = "2" OR [neuro_18] = "3" | Duration of Symptom (in days)<br><br>(Rigidity)                                                                 | text (number)                                             |
| 160 | neuro_18_3<br>Show the field ONLY if:<br>[neuro_18] = "1" OR [neuro_18] = "2" OR [neuro_18] = "3" | Details of the symptom (Can you describe the symptom in more detail?)<br><br>(Rigidity)                         | notes                                                     |
| 161 | neuro_19<br>Show the field ONLY if:<br>[covid_1] = "1" OR [covid_1] = "3"                         | Difficulty walking                                                                                              | radio<br>0 0=no<br>1 1=mild<br>2 2=moderate<br>3 3=severe |
| 162 | neuro_19_2<br>Show the field ONLY if:<br>[neuro_19] = "1" OR [neuro_19] = "2" OR [neuro_19] = "3" | Duration of Symptom (in days)<br><br>(Difficulty walking)                                                       | text (number)                                             |
| 163 | neuro_19_3<br>Show the field ONLY if:<br>[neuro_19] = "1" OR [neuro_19] = "2" OR [neuro_19] = "3" | Details of the symptom (Can you describe the symptom in more detail?)<br><br>(Difficulty walking)               | notes                                                     |
| 164 | neuro_20<br>Show the field ONLY if:<br>[covid_1] = "1" OR [covid_1] = "3"                         | (Ataxia) Difficulty with balance                                                                                | radio<br>0 0=no<br>1 1=mild<br>2 2=moderate<br>3 3=severe |
| 165 | neuro_20_2<br>Show the field ONLY if:<br>[neuro_20] = "1" OR [neuro_20] = "2" OR [neuro_20] = "3" | Duration of Symptom (in days)<br><br>[(Ataxia) Difficulty with balance]                                         | text (number)                                             |
| 166 | neuro_20_3<br>Show the field ONLY if:<br>[neuro_20] = "1" OR [neuro_20] = "2" OR [neuro_20] = "3" | Details of the symptom (Can you describe the symptom in more detail?)<br><br>[(Ataxia) Difficulty with balance] | notes                                                     |
| 167 | neuro_21<br>Show the field ONLY if:<br>[covid_1] = "1" OR [covid_1] = "3"                         | Falls                                                                                                           | radio<br>0 0=no<br>1 1=mild<br>2 2=moderate<br>3 3=severe |
| 168 | neuro_21_2<br>Show the field ONLY if:<br>[neuro_21] = "1" OR [neuro_21] = "2" OR [neuro_21] = "3" | Duration of Symptom (in days)<br><br>(Falls)                                                                    | text (number)                                             |

|     |                                                                                                   |                                                                                                                       |                                                           |
|-----|---------------------------------------------------------------------------------------------------|-----------------------------------------------------------------------------------------------------------------------|-----------------------------------------------------------|
| 169 | neuro_21_3<br>Show the field ONLY if:<br>[neuro_21] = "1" OR [neuro_21] = "2" OR [neuro_21] = "3" | Details of the symptom<br>(Can you describe the symptom in more detail?)<br><br>(Falls)                               | notes                                                     |
| 170 | neuro_22<br>Show the field ONLY if:<br>[covid_1] = "1" OR [covid_1] = "3"                         | Bradykinesia (slowness in movement)                                                                                   | radio<br>0 0=no<br>1 1=mild<br>2 2=moderate<br>3 3=severe |
| 171 | neuro_22_2<br>Show the field ONLY if:<br>[neuro_22] = "1" OR [neuro_22] = "2" OR [neuro_22] = "3" | Duration of Symptom (in days)<br><br>(Bradykinesia (slowness in movement))                                            | text (number)                                             |
| 172 | neuro_22_3<br>Show the field ONLY if:<br>[neuro_22] = "1" OR [neuro_22] = "2" OR [neuro_22] = "3" | Details of the symptom<br>(Can you describe the symptom in more detail?)<br><br>(Bradykinesia (slowness in movement)) | notes                                                     |
| 173 | neuro_23<br>Show the field ONLY if:<br>[covid_1] = "1" OR [covid_1] = "3"                         | Freezing of gait                                                                                                      | radio<br>0 0=no<br>1 1=mild<br>2 2=moderate<br>3 3=severe |
| 174 | neuro_23_1<br>Show the field ONLY if:<br>[neuro_23] = "1" OR [neuro_23] = "2" OR [neuro_23] = "3" | Duration of Symptom (in days)<br><br>(Freezing of gait)                                                               | text (number)                                             |
| 175 | neuro_23_2<br>Show the field ONLY if:<br>[neuro_23] = "1" OR [neuro_23] = "2" OR [neuro_23] = "3" | Details of the symptom<br>(Can you describe the symptom in more detail?)<br><br>(Freezing of gait)                    | notes                                                     |
| 176 | neuro_24<br>Show the field ONLY if:<br>[covid_1] = "1" OR [covid_1] = "3"                         | Dyskinesias                                                                                                           | radio<br>0 0=no<br>1 1=mild<br>2 2=moderate<br>3 3=severe |
| 177 | neuro_24_1<br>Show the field ONLY if:<br>[neuro_24] = "1" OR [neuro_24] = "2" OR [neuro_24] = "3" | Duration of Symptom (in days)<br><br>(Dyskinesias)                                                                    | text (number)                                             |
| 178 | neuro_24_2<br>Show the field ONLY if:<br>[neuro_24] = "1" OR [neuro_24] = "2" OR [neuro_24] = "3" | Details of the symptom<br>(Can you describe the symptom in more detail?)<br><br>(Dyskinesias)                         | notes                                                     |
| 179 | neuro_25<br>Show the field ONLY if:<br>[covid_1] = "1" OR [covid_1] = "3"                         | Dystonia                                                                                                              | radio<br>0 0=no<br>1 1=mild<br>2 2=moderate<br>3 3=severe |

|     |                                                                                                   |                                                                                                   |                                                                                                                                                                                      |   |      |   |        |   |            |   |          |
|-----|---------------------------------------------------------------------------------------------------|---------------------------------------------------------------------------------------------------|--------------------------------------------------------------------------------------------------------------------------------------------------------------------------------------|---|------|---|--------|---|------------|---|----------|
| 180 | neuro_25_1<br>Show the field ONLY if:<br>[neuro_25] = "1" OR [neuro_25] = "2" OR [neuro_25] = "3" | Duration of Symptom (in days)<br><br>(Dystonia)                                                   | text (number)                                                                                                                                                                        |   |      |   |        |   |            |   |          |
| 181 | neuro_25_2<br>Show the field ONLY if:<br>[neuro_25] = "1" OR [neuro_25] = "2" OR [neuro_25] = "3" | Details of the symptom<br>(Can you describe the symptom in more detail?)<br><br>(Dystonia)        | notes                                                                                                                                                                                |   |      |   |        |   |            |   |          |
| 182 | neuro_26<br>Show the field ONLY if:<br>[covid_1] = "1" OR [covid_1] = "3"                         | Sleep- Insomnia                                                                                   | radio<br><table border="1"> <tr><td>0</td><td>0=no</td></tr> <tr><td>1</td><td>1=mild</td></tr> <tr><td>2</td><td>2=moderate</td></tr> <tr><td>3</td><td>3=severe</td></tr> </table> | 0 | 0=no | 1 | 1=mild | 2 | 2=moderate | 3 | 3=severe |
| 0   | 0=no                                                                                              |                                                                                                   |                                                                                                                                                                                      |   |      |   |        |   |            |   |          |
| 1   | 1=mild                                                                                            |                                                                                                   |                                                                                                                                                                                      |   |      |   |        |   |            |   |          |
| 2   | 2=moderate                                                                                        |                                                                                                   |                                                                                                                                                                                      |   |      |   |        |   |            |   |          |
| 3   | 3=severe                                                                                          |                                                                                                   |                                                                                                                                                                                      |   |      |   |        |   |            |   |          |
| 183 | neuro_26_1<br>Show the field ONLY if:<br>[neuro_26] = "1" OR [neuro_26] = "2" OR [neuro_26] = "3" | Duration of Symptom (in days)<br><br>(Sleep- Insomnia)                                            | text (number)                                                                                                                                                                        |   |      |   |        |   |            |   |          |
| 184 | neuro_26_2<br>Show the field ONLY if:<br>[neuro_26] = "1" OR [neuro_26] = "2" OR [neuro_26] = "3" | Details of the symptom<br>(Can you describe the symptom in more detail?)<br><br>(Sleep- Insomnia) | notes                                                                                                                                                                                |   |      |   |        |   |            |   |          |
| 185 | neuro_27<br>Show the field ONLY if:<br>[covid_1] = "1" OR [covid_1] = "3"                         | Anxiety                                                                                           | radio<br><table border="1"> <tr><td>0</td><td>0=no</td></tr> <tr><td>1</td><td>1=mild</td></tr> <tr><td>2</td><td>2=moderate</td></tr> <tr><td>3</td><td>3=severe</td></tr> </table> | 0 | 0=no | 1 | 1=mild | 2 | 2=moderate | 3 | 3=severe |
| 0   | 0=no                                                                                              |                                                                                                   |                                                                                                                                                                                      |   |      |   |        |   |            |   |          |
| 1   | 1=mild                                                                                            |                                                                                                   |                                                                                                                                                                                      |   |      |   |        |   |            |   |          |
| 2   | 2=moderate                                                                                        |                                                                                                   |                                                                                                                                                                                      |   |      |   |        |   |            |   |          |
| 3   | 3=severe                                                                                          |                                                                                                   |                                                                                                                                                                                      |   |      |   |        |   |            |   |          |
| 186 | neuro_27_1<br>Show the field ONLY if:<br>[neuro_27] = "1" OR [neuro_27] = "2" OR [neuro_27] = "3" | Duration of Symptom (in days)<br><br>(Anxiety)                                                    | text (number)                                                                                                                                                                        |   |      |   |        |   |            |   |          |
| 187 | neuro_27_2<br>Show the field ONLY if:<br>[neuro_27] = "1" OR [neuro_27] = "2" OR [neuro_27] = "3" | Details of the symptom<br>(Can you describe the symptom in more detail?)<br><br>(Anxiety)         | notes                                                                                                                                                                                |   |      |   |        |   |            |   |          |
| 188 | neuro_28<br>Show the field ONLY if:<br>[covid_1] = "1" OR [covid_1] = "3"                         | Apathy                                                                                            | radio<br><table border="1"> <tr><td>0</td><td>0=no</td></tr> <tr><td>1</td><td>1=mild</td></tr> <tr><td>2</td><td>2=moderate</td></tr> <tr><td>3</td><td>3=severe</td></tr> </table> | 0 | 0=no | 1 | 1=mild | 2 | 2=moderate | 3 | 3=severe |
| 0   | 0=no                                                                                              |                                                                                                   |                                                                                                                                                                                      |   |      |   |        |   |            |   |          |
| 1   | 1=mild                                                                                            |                                                                                                   |                                                                                                                                                                                      |   |      |   |        |   |            |   |          |
| 2   | 2=moderate                                                                                        |                                                                                                   |                                                                                                                                                                                      |   |      |   |        |   |            |   |          |
| 3   | 3=severe                                                                                          |                                                                                                   |                                                                                                                                                                                      |   |      |   |        |   |            |   |          |
| 189 | neuro_28_1<br>Show the field ONLY if:<br>[neuro_28] = "1" OR [neuro_28] = "2" OR [neuro_28] = "3" | Duration of Symptom (in days)<br><br>(Apathy)                                                     | text (number)                                                                                                                                                                        |   |      |   |        |   |            |   |          |
| 190 | neuro_28_2<br>Show the field ONLY if:<br>[neuro_28] = "1" OR [neuro_28] = "2" OR [neuro_28] = "3" | Details of the symptom<br>(Can you describe the symptom in more detail?)<br><br>(Apathy)          | notes                                                                                                                                                                                |   |      |   |        |   |            |   |          |

|     |                                                                                                   |                                                                                                |                                                           |
|-----|---------------------------------------------------------------------------------------------------|------------------------------------------------------------------------------------------------|-----------------------------------------------------------|
| 191 | neuro_29<br>Show the field ONLY if:<br>[covid_1] = "1" OR [covid_1] = "3"                         | Constipation                                                                                   | radio<br>0 0=no<br>1 1=mild<br>2 2=moderate<br>3 3=severe |
| 192 | neuro_29_1<br>Show the field ONLY if:<br>[neuro_29] = "1" OR [neuro_29] = "2" OR [neuro_29] = "3" | Duration of Symptom (in days)<br>(Constipation)                                                | text (number)                                             |
| 193 | neuro_29_2<br>Show the field ONLY if:<br>[neuro_29] = "1" OR [neuro_29] = "2" OR [neuro_29] = "3" | Details of the symptom<br>(Can you describe the symptom in more detail?)<br><br>(Constipation) | notes                                                     |
| 194 | neuro_30<br>Show the field ONLY if:<br>[covid_1] = "1" OR [covid_1] = "3"                         | Pain                                                                                           | radio<br>0 0=no<br>1 1=mild<br>2 2=moderate<br>3 3=severe |
| 195 | neuro_30_1<br>Show the field ONLY if:<br>[neuro_30] = "1" OR [neuro_30] = "2" OR [neuro_30] = "3" | Duration of Symptom (in days)<br>(Pain)                                                        | text (number)                                             |
| 196 | neuro_30_2<br>Show the field ONLY if:<br>[neuro_30] = "1" OR [neuro_30] = "2" OR [neuro_30] = "3" | Details of the symptom<br>(Can you describe the symptom in more detail?)<br><br>(Pain)         | notes                                                     |
| 197 | neuro_31<br>Show the field ONLY if:<br>[covid_1] = "1" OR [covid_1] = "3"                         | OFF time                                                                                       | radio<br>0 0=no<br>1 1=mild<br>2 2=moderate<br>3 3=severe |
| 198 | neuro_31_1<br>Show the field ONLY if:<br>[neuro_31] = "1" OR [neuro_31] = "2" OR [neuro_31] = "3" | Duration of Symptom (in days)<br>(OFF time)                                                    | text (number)                                             |
| 199 | neuro_31_2<br>Show the field ONLY if:<br>[neuro_31] = "1" OR [neuro_31] = "2" OR [neuro_31] = "3" | Details of the symptom<br>(Can you describe the symptom in more detail?)<br><br>(OFF time)     | notes                                                     |
| 200 | neuro_32<br>Show the field ONLY if:<br>[covid_1] = "1" OR [covid_1] = "3"                         | Other                                                                                          | radio<br>0 0=no<br>1 1=mild<br>2 2=moderate<br>3 3=severe |
| 201 | neuro_32_1<br>Show the field ONLY if:<br>[neuro_32] = "1" OR [neuro_32] = "2" OR [neuro_32] = "3" | Duration of Symptom (in days)<br>(Other)                                                       | text (number)                                             |



|     |                                                                                                   |                                                                                                                                                                |                                 |
|-----|---------------------------------------------------------------------------------------------------|----------------------------------------------------------------------------------------------------------------------------------------------------------------|---------------------------------|
| 202 | neuro_32_2<br>Show the field ONLY if:<br>[neuro_32] = "1" OR [neuro_32] = "2" OR [neuro_32] = "3" | Details of the symptom<br>(Can you describe the symptom in more detail?)<br><br>(Other)                                                                        | notes                           |
| 203 | medhist_1_1<br>Show the field ONLY if:<br>[covid_1] = "1" OR [covid_1] = "3"                      | Section Header: <i>(Past Medical History) Have you been Diagnosed with any of the following conditions before COVID?</i><br>Hypertension (High Blood Pressure) | radio (Matrix)<br>1 Yes<br>2 No |
| 204 | medhist_1_2<br>Show the field ONLY if:<br>[covid_1] = "1" OR [covid_1] = "3"                      | Diabetes Mellitus (Childhood onset)                                                                                                                            | radio (Matrix)<br>1 Yes<br>2 No |
| 205 | medhist_1_3<br>Show the field ONLY if:<br>[covid_1] = "1" OR [covid_1] = "3"                      | Diabetes Mellitus (Adult onset)                                                                                                                                | radio (Matrix)<br>1 Yes<br>2 No |
| 206 | medhist_1_4<br>Show the field ONLY if:<br>[covid_1] = "1" OR [covid_1] = "3"                      | Myocardial infarct (Heart Attach)                                                                                                                              | radio (Matrix)<br>1 Yes<br>2 No |
| 207 | medhist_1_5<br>Show the field ONLY if:<br>[covid_1] = "1" OR [covid_1] = "3"                      | Congestive heart Failure                                                                                                                                       | radio (Matrix)<br>1 Yes<br>2 No |
| 208 | medhist_1_6<br>Show the field ONLY if:<br>[covid_1] = "1" OR [covid_1] = "3"                      | Arrhythmia/ Atrial Fibrillation                                                                                                                                | radio (Matrix)<br>1 Yes<br>2 No |
| 209 | medhist_1_7<br>Show the field ONLY if:<br>[covid_1] = "1" OR [covid_1] = "3"                      | Hypercholesterolemia (High Cholesterol)                                                                                                                        | radio (Matrix)<br>1 Yes<br>2 No |
| 210 | medhist_1_8<br>Show the field ONLY if:<br>[covid_1] = "1" OR [covid_1] = "3"                      | Hearing Loss                                                                                                                                                   | radio (Matrix)<br>1 Yes<br>2 No |
| 211 | medhist_1_9<br>Show the field ONLY if:<br>[covid_1] = "1" OR [covid_1] = "3"                      | Loss of smell                                                                                                                                                  | radio (Matrix)<br>1 Yes<br>2 No |
| 212 | medhist_1_10<br>Show the field ONLY if:<br>[covid_1] = "1" OR [covid_1] = "3"                     | Lung disease (including emphysema)                                                                                                                             | radio (Matrix)<br>1 Yes<br>2 No |
| 213 | medhist_1_11<br>Show the field ONLY if:<br>[covid_1] = "1" OR [covid_1] = "3"                     | Thyroid disease (not cancer, including Grave's disease)                                                                                                        | radio (Matrix)<br>1 Yes<br>2 No |
| 214 | medhist_1_12<br>Show the field ONLY if:<br>[covid_1] = "1" OR [covid_1] = "3"                     | Liver disease                                                                                                                                                  | radio (Matrix)<br>1 Yes<br>2 No |
| 215 | medhist_1_13<br>Show the field ONLY if:<br>[covid_1] = "1" OR [covid_1] = "3"                     | Renal insufficiency (kidney disease)                                                                                                                           | radio (Matrix)<br>1 Yes<br>2 No |

|     |                                                                                           |                                                                               |                                                                                                                  |   |     |   |    |
|-----|-------------------------------------------------------------------------------------------|-------------------------------------------------------------------------------|------------------------------------------------------------------------------------------------------------------|---|-----|---|----|
| 216 | <p>medhist_1_14</p> <p>Show the field ONLY if:<br/>[covid_1] = "1" OR [covid_1] = "3"</p> | Peptic ulcer disease                                                          | <p>radio (Matrix)</p> <table border="1"> <tr><td>1</td><td>Yes</td></tr> <tr><td>2</td><td>No</td></tr> </table> | 1 | Yes | 2 | No |
| 1   | Yes                                                                                       |                                                                               |                                                                                                                  |   |     |   |    |
| 2   | No                                                                                        |                                                                               |                                                                                                                  |   |     |   |    |
| 217 | <p>medhist_1_15</p> <p>Show the field ONLY if:<br/>[covid_1] = "1" OR [covid_1] = "3"</p> | Peripheral vascular disease                                                   | <p>radio (Matrix)</p> <table border="1"> <tr><td>1</td><td>Yes</td></tr> <tr><td>2</td><td>No</td></tr> </table> | 1 | Yes | 2 | No |
| 1   | Yes                                                                                       |                                                                               |                                                                                                                  |   |     |   |    |
| 2   | No                                                                                        |                                                                               |                                                                                                                  |   |     |   |    |
| 218 | <p>medhist_1_16</p> <p>Show the field ONLY if:<br/>[covid_1] = "1" OR [covid_1] = "3"</p> | Stroke mini stroke, CVA (cerebrovascular accident) or TIA (transient ischemic | <p>radio (Matrix)</p> <table border="1"> <tr><td>1</td><td>Yes</td></tr> <tr><td>2</td><td>No</td></tr> </table> | 1 | Yes | 2 | No |
| 1   | Yes                                                                                       |                                                                               |                                                                                                                  |   |     |   |    |
| 2   | No                                                                                        |                                                                               |                                                                                                                  |   |     |   |    |
| 219 | <p>medhist_1_17</p> <p>Show the field ONLY if:<br/>[covid_1] = "1" OR [covid_1] = "3"</p> | Seizure, fit, convulsion or unexplained loss of consciousness                 | <p>radio (Matrix)</p> <table border="1"> <tr><td>1</td><td>Yes</td></tr> <tr><td>2</td><td>No</td></tr> </table> | 1 | Yes | 2 | No |
| 1   | Yes                                                                                       |                                                                               |                                                                                                                  |   |     |   |    |
| 2   | No                                                                                        |                                                                               |                                                                                                                  |   |     |   |    |
| 220 | <p>medhist_1_18</p> <p>Show the field ONLY if:<br/>[covid_1] = "1" OR [covid_1] = "3"</p> | Arthritis                                                                     | <p>radio (Matrix)</p> <table border="1"> <tr><td>1</td><td>Yes</td></tr> <tr><td>2</td><td>No</td></tr> </table> | 1 | Yes | 2 | No |
| 1   | Yes                                                                                       |                                                                               |                                                                                                                  |   |     |   |    |
| 2   | No                                                                                        |                                                                               |                                                                                                                  |   |     |   |    |
| 221 | <p>medhist_1_19</p> <p>Show the field ONLY if:<br/>[covid_1] = "1" OR [covid_1] = "3"</p> | Hip Fracture                                                                  | <p>radio (Matrix)</p> <table border="1"> <tr><td>1</td><td>Yes</td></tr> <tr><td>2</td><td>No</td></tr> </table> | 1 | Yes | 2 | No |
| 1   | Yes                                                                                       |                                                                               |                                                                                                                  |   |     |   |    |
| 2   | No                                                                                        |                                                                               |                                                                                                                  |   |     |   |    |
| 222 | <p>medhist_1_20</p> <p>Show the field ONLY if:<br/>[covid_1] = "1" OR [covid_1] = "3"</p> | Gout                                                                          | <p>radio (Matrix)</p> <table border="1"> <tr><td>1</td><td>Yes</td></tr> <tr><td>2</td><td>No</td></tr> </table> | 1 | Yes | 2 | No |
| 1   | Yes                                                                                       |                                                                               |                                                                                                                  |   |     |   |    |
| 2   | No                                                                                        |                                                                               |                                                                                                                  |   |     |   |    |
| 223 | <p>medhist_1_21</p> <p>Show the field ONLY if:<br/>[covid_1] = "1" OR [covid_1] = "3"</p> | Recreational drug use                                                         | <p>radio (Matrix)</p> <table border="1"> <tr><td>1</td><td>Yes</td></tr> <tr><td>2</td><td>No</td></tr> </table> | 1 | Yes | 2 | No |
| 1   | Yes                                                                                       |                                                                               |                                                                                                                  |   |     |   |    |
| 2   | No                                                                                        |                                                                               |                                                                                                                  |   |     |   |    |
| 224 | <p>medhist_1_22</p> <p>Show the field ONLY if:<br/>[covid_1] = "1" OR [covid_1] = "3"</p> | Gaucher disease                                                               | <p>radio (Matrix)</p> <table border="1"> <tr><td>1</td><td>Yes</td></tr> <tr><td>2</td><td>No</td></tr> </table> | 1 | Yes | 2 | No |
| 1   | Yes                                                                                       |                                                                               |                                                                                                                  |   |     |   |    |
| 2   | No                                                                                        |                                                                               |                                                                                                                  |   |     |   |    |
| 225 | <p>medhist_1_23</p> <p>Show the field ONLY if:<br/>[covid_1] = "1" OR [covid_1] = "3"</p> | Multiple sclerosis                                                            | <p>radio (Matrix)</p> <table border="1"> <tr><td>1</td><td>Yes</td></tr> <tr><td>2</td><td>No</td></tr> </table> | 1 | Yes | 2 | No |
| 1   | Yes                                                                                       |                                                                               |                                                                                                                  |   |     |   |    |
| 2   | No                                                                                        |                                                                               |                                                                                                                  |   |     |   |    |
| 226 | <p>medhist_1_24</p> <p>Show the field ONLY if:<br/>[covid_1] = "1" OR [covid_1] = "3"</p> | B12 deficiency                                                                | <p>radio (Matrix)</p> <table border="1"> <tr><td>1</td><td>Yes</td></tr> <tr><td>2</td><td>No</td></tr> </table> | 1 | Yes | 2 | No |
| 1   | Yes                                                                                       |                                                                               |                                                                                                                  |   |     |   |    |
| 2   | No                                                                                        |                                                                               |                                                                                                                  |   |     |   |    |
| 227 | <p>medhist_1_25</p> <p>Show the field ONLY if:<br/>[covid_1] = "1" OR [covid_1] = "3"</p> | Normal pressure hydrocephalus                                                 | <p>radio (Matrix)</p> <table border="1"> <tr><td>1</td><td>Yes</td></tr> <tr><td>2</td><td>No</td></tr> </table> | 1 | Yes | 2 | No |
| 1   | Yes                                                                                       |                                                                               |                                                                                                                  |   |     |   |    |
| 2   | No                                                                                        |                                                                               |                                                                                                                  |   |     |   |    |
| 228 | <p>medhist_1_26</p> <p>Show the field ONLY if:<br/>[covid_1] = "1" OR [covid_1] = "3"</p> | Peripheral neuropathy                                                         | <p>radio (Matrix)</p> <table border="1"> <tr><td>1</td><td>Yes</td></tr> <tr><td>2</td><td>No</td></tr> </table> | 1 | Yes | 2 | No |
| 1   | Yes                                                                                       |                                                                               |                                                                                                                  |   |     |   |    |
| 2   | No                                                                                        |                                                                               |                                                                                                                  |   |     |   |    |
| 229 | <p>medhist_1_27</p> <p>Show the field ONLY if:<br/>[covid_1] = "1" OR [covid_1] = "3"</p> | Crohn's disease/ Ulcerative colitis                                           | <p>radio (Matrix)</p> <table border="1"> <tr><td>1</td><td>Yes</td></tr> <tr><td>2</td><td>No</td></tr> </table> | 1 | Yes | 2 | No |
| 1   | Yes                                                                                       |                                                                               |                                                                                                                  |   |     |   |    |
| 2   | No                                                                                        |                                                                               |                                                                                                                  |   |     |   |    |
| 230 | <p>medhist_1_28</p> <p>Show the field ONLY if:<br/>[covid_1] = "1" OR [covid_1] = "3"</p> | Cancer                                                                        | <p>radio (Matrix)</p> <table border="1"> <tr><td>1</td><td>Yes</td></tr> <tr><td>2</td><td>No</td></tr> </table> | 1 | Yes | 2 | No |
| 1   | Yes                                                                                       |                                                                               |                                                                                                                  |   |     |   |    |
| 2   | No                                                                                        |                                                                               |                                                                                                                  |   |     |   |    |

|     |                                                                               |                                                                                                                  |                                 |
|-----|-------------------------------------------------------------------------------|------------------------------------------------------------------------------------------------------------------|---------------------------------|
| 231 | medhist_1_29<br>Show the field ONLY if:<br>[covid_1] = "1" OR [covid_1] = "3" | Brain surgery                                                                                                    | radio (Matrix)<br>1 Yes<br>2 No |
| 232 | medhist_1_30<br>Show the field ONLY if:<br>[covid_1] = "1" OR [covid_1] = "3" | Other                                                                                                            | radio (Matrix)<br>1 Yes<br>2 No |
| 233 | medhist_1_29_1<br>Show the field ONLY if:<br>[medhist_1_29] = "1"             | If yes to brain surgery, was that DBS? When (age)?                                                               | text (number)                   |
| 234 | medhist_1_10_2<br>Show the field ONLY if:<br>[medhist_1_10] = "1"             | Specify Lung Disease                                                                                             | text                            |
| 235 | medhist_1_30_1<br>Show the field ONLY if:<br>[medhist_1_30] = "1"             | Specify Other                                                                                                    | text                            |
| 236 | meds_1<br>Show the field ONLY if:<br>[covid_1] = "1" OR [covid_1] = "3"       | Section Header: <i>III. What medications are you currently taking for PD? (Name, dose, frequency)</i><br>Sinemet | radio<br>1 Yes<br>0 No          |
| 237 | meds_1_1<br>Show the field ONLY if:<br>[meds_1] = "1"                         | Levodopa Dose (mg)<br><br>(Sinemet)                                                                              | text (number)                   |
| 238 | meds_1_2<br>Show the field ONLY if:<br>[meds_1] = "1"                         | Frequency (times per day)<br><br>(Sinemet)                                                                       | text (number)                   |
| 239 | meds_2<br>Show the field ONLY if:<br>[covid_1] = "1" OR [covid_1] = "3"       | Stalevo                                                                                                          | yesno<br>1 Yes<br>0 No          |
| 240 | meds_2_1<br>Show the field ONLY if:<br>[meds_2] = "1"                         | Dose (mg)<br><br>(Stalevo)                                                                                       | text (number)                   |
| 241 | meds_2_2<br>Show the field ONLY if:<br>[meds_2] = "1"                         | Frequency (times per day)<br><br>(Stalevo)                                                                       | text (number)                   |
| 242 | meds_3<br>Show the field ONLY if:<br>[covid_1] = "1" OR [covid_1] = "3"       | Mirapex                                                                                                          | yesno<br>1 Yes<br>0 No          |
| 243 | meds_3_1<br>Show the field ONLY if:<br>[meds_3] = "1"                         | Dose (mg)<br><br>(Mirapex)                                                                                       | text (number)                   |
| 244 | meds_3_2<br>Show the field ONLY if:<br>[meds_3] = "1"                         | Frequency (times per day)<br><br>(Mirapex)                                                                       | text (number)                   |
| 245 | meds_4<br>Show the field ONLY if:<br>[covid_1] = "1" OR [covid_1] = "3"       | Requip                                                                                                           | yesno<br>1 Yes<br>0 No          |
| 246 | meds_4_1<br>Show the field ONLY if:<br>[meds_4] = "1"                         | Dose (mg)<br><br>(Requip)                                                                                        | text (number)                   |
| 247 | meds_4_2<br>Show the field ONLY if:<br>[meds_4] = "1"                         | Frequency (times per day)<br><br>(Requip)                                                                        | text (number)                   |

|     |                                                                          |                                                         |                                                                                                  |   |     |   |    |
|-----|--------------------------------------------------------------------------|---------------------------------------------------------|--------------------------------------------------------------------------------------------------|---|-----|---|----|
| 248 | meds_5<br>Show the field ONLY if:<br>[covid_1] = "1" OR [covid_1] = "3"  | Amantadine (Symmetrel)                                  | yesno<br><table border="1"><tr><td>1</td><td>Yes</td></tr><tr><td>0</td><td>No</td></tr></table> | 1 | Yes | 0 | No |
| 1   | Yes                                                                      |                                                         |                                                                                                  |   |     |   |    |
| 0   | No                                                                       |                                                         |                                                                                                  |   |     |   |    |
| 249 | meds_5_1<br>Show the field ONLY if:<br>[meds_5] = "1"                    | Dose (mg)<br>(Amantadine [Symmetrel])                   | text (number)                                                                                    |   |     |   |    |
| 250 | meds_5_2<br>Show the field ONLY if:<br>[meds_5] = "1"                    | Frequency (times per day)<br>(Amantadine [Symmetrel])   | text (number)                                                                                    |   |     |   |    |
| 251 | meds_6<br>Show the field ONLY if:<br>[covid_1] = "1" OR [covid_1] = "3"  | Artane (trihexyphenidyl)                                | yesno<br><table border="1"><tr><td>1</td><td>Yes</td></tr><tr><td>0</td><td>No</td></tr></table> | 1 | Yes | 0 | No |
| 1   | Yes                                                                      |                                                         |                                                                                                  |   |     |   |    |
| 0   | No                                                                       |                                                         |                                                                                                  |   |     |   |    |
| 252 | meds_6_1<br>Show the field ONLY if:<br>[meds_6] = "1"                    | Dose (mg)<br>(Artane [trihexyphenidyl])                 | text                                                                                             |   |     |   |    |
| 253 | meds_6_2<br>Show the field ONLY if:<br>[meds_6] = "1"                    | Frequency (times per day)<br>(Artane [trihexyphenidyl]) | text                                                                                             |   |     |   |    |
| 254 | meds_7<br>Show the field ONLY if:<br>[covid_1] = "1" OR [covid_1] = "3"  | Azilect (rasagiline)                                    | yesno<br><table border="1"><tr><td>1</td><td>Yes</td></tr><tr><td>0</td><td>No</td></tr></table> | 1 | Yes | 0 | No |
| 1   | Yes                                                                      |                                                         |                                                                                                  |   |     |   |    |
| 0   | No                                                                       |                                                         |                                                                                                  |   |     |   |    |
| 255 | meds_7_1<br>Show the field ONLY if:<br>[meds_7] = "1"                    | Dose (mg)<br>(Azilect [rasagiline])                     | text                                                                                             |   |     |   |    |
| 256 | meds_7_2<br>Show the field ONLY if:<br>[meds_7] = "1"                    | Frequency (times per day)<br>(Azilect [rasagiline])     | text                                                                                             |   |     |   |    |
| 257 | meds_8<br>Show the field ONLY if:<br>[covid_1] = "1" OR [covid_1] = "3"  | Comtan (entacapone)                                     | yesno<br><table border="1"><tr><td>1</td><td>Yes</td></tr><tr><td>0</td><td>No</td></tr></table> | 1 | Yes | 0 | No |
| 1   | Yes                                                                      |                                                         |                                                                                                  |   |     |   |    |
| 0   | No                                                                       |                                                         |                                                                                                  |   |     |   |    |
| 258 | meds_8_1<br>Show the field ONLY if:<br>[meds_8] = "1"                    | Dose (mg)<br>(Comtan [entacapone])                      | text (number)                                                                                    |   |     |   |    |
| 259 | meds_8_2<br>Show the field ONLY if:<br>[meds_8] = "1"                    | Frequency (times per day)<br>(Comtan [entacapone])      | text (number)                                                                                    |   |     |   |    |
| 260 | meds_9<br>Show the field ONLY if:<br>[covid_1] = "1" OR [covid_1] = "3"  | Eldepryl (selegiline)                                   | yesno<br><table border="1"><tr><td>1</td><td>Yes</td></tr><tr><td>0</td><td>No</td></tr></table> | 1 | Yes | 0 | No |
| 1   | Yes                                                                      |                                                         |                                                                                                  |   |     |   |    |
| 0   | No                                                                       |                                                         |                                                                                                  |   |     |   |    |
| 261 | meds_9_1<br>Show the field ONLY if:<br>[meds_9] = "1"                    | Dose (mg)<br>(Eldepryl [selegiline])                    | text (number)                                                                                    |   |     |   |    |
| 262 | meds_9_2<br>Show the field ONLY if:<br>[meds_9] = "1"                    | Frequency (times per day)<br>(Eldepryl [selegiline])    | text (number)                                                                                    |   |     |   |    |
| 263 | meds_10<br>Show the field ONLY if:<br>[covid_1] = "1" OR [covid_1] = "3" | Parcopa                                                 | yesno<br><table border="1"><tr><td>1</td><td>Yes</td></tr><tr><td>0</td><td>No</td></tr></table> | 1 | Yes | 0 | No |
| 1   | Yes                                                                      |                                                         |                                                                                                  |   |     |   |    |
| 0   | No                                                                       |                                                         |                                                                                                  |   |     |   |    |
| 264 | meds_10_1<br>Show the field ONLY if:<br>[meds_10] = "1"                  | Dose (mg)<br>(Parcopa)                                  | text (number)                                                                                    |   |     |   |    |

|     |                                                                          |                                                               |                                                                                                     |   |     |   |    |
|-----|--------------------------------------------------------------------------|---------------------------------------------------------------|-----------------------------------------------------------------------------------------------------|---|-----|---|----|
| 265 | meds_10_2<br>Show the field ONLY if:<br>[meds_10] = "1"                  | Frequency (times per day)<br>(Parcopa)                        | text (number)                                                                                       |   |     |   |    |
| 266 | meds_11<br>Show the field ONLY if:<br>[covid_1] = "1" OR [covid_1] = "3" | Aricept (donepezil)                                           | yesno<br><table border="1"> <tr><td>1</td><td>Yes</td></tr> <tr><td>0</td><td>No</td></tr> </table> | 1 | Yes | 0 | No |
| 1   | Yes                                                                      |                                                               |                                                                                                     |   |     |   |    |
| 0   | No                                                                       |                                                               |                                                                                                     |   |     |   |    |
| 267 | meds_11_1<br>Show the field ONLY if:<br>[meds_11] = "1"                  | Dose (mg)<br>(Aricept [donepezil])                            | text (number)                                                                                       |   |     |   |    |
| 268 | meds_11_2<br>Show the field ONLY if:<br>[meds_11] = "1"                  | Frequency (times per day)<br>(Aricept [donepezil])            | text (number)                                                                                       |   |     |   |    |
| 269 | meds_12<br>Show the field ONLY if:<br>[covid_1] = "1" OR [covid_1] = "3" | Clozaril (clozapine)                                          | yesno<br><table border="1"> <tr><td>1</td><td>Yes</td></tr> <tr><td>0</td><td>No</td></tr> </table> | 1 | Yes | 0 | No |
| 1   | Yes                                                                      |                                                               |                                                                                                     |   |     |   |    |
| 0   | No                                                                       |                                                               |                                                                                                     |   |     |   |    |
| 270 | meds_12_1<br>Show the field ONLY if:<br>[meds_12] = "1"                  | Dose (mg)<br>(Clozaril [clozapine])                           | text (number)                                                                                       |   |     |   |    |
| 271 | meds_12_2<br>Show the field ONLY if:<br>[meds_12] = "1"                  | Frequency (times per day)<br>(Clozaril [clozapine])           | text (number)                                                                                       |   |     |   |    |
| 272 | meds_13<br>Show the field ONLY if:<br>[covid_1] = "1" OR [covid_1] = "3" | Cogentin (benztropine)                                        | yesno<br><table border="1"> <tr><td>1</td><td>Yes</td></tr> <tr><td>0</td><td>No</td></tr> </table> | 1 | Yes | 0 | No |
| 1   | Yes                                                                      |                                                               |                                                                                                     |   |     |   |    |
| 0   | No                                                                       |                                                               |                                                                                                     |   |     |   |    |
| 273 | meds_13_1<br>Show the field ONLY if:<br>[meds_13] = "1"                  | Dose (mg)<br>(Cogentin [benztropine])                         | text (number)                                                                                       |   |     |   |    |
| 274 | meds_13_2<br>Show the field ONLY if:<br>[meds_13] = "1"                  | Frequency (times per day)<br>(Cogentin [benztropine])         | text                                                                                                |   |     |   |    |
| 275 | meds_14<br>Show the field ONLY if:<br>[covid_1] = "1" OR [covid_1] = "3" | Klonopin (clonazepam)                                         | yesno<br><table border="1"> <tr><td>1</td><td>Yes</td></tr> <tr><td>0</td><td>No</td></tr> </table> | 1 | Yes | 0 | No |
| 1   | Yes                                                                      |                                                               |                                                                                                     |   |     |   |    |
| 0   | No                                                                       |                                                               |                                                                                                     |   |     |   |    |
| 276 | meds_14_1<br>Show the field ONLY if:<br>[meds_14] = "1"                  | Dose (mg)<br>(Klonopin [clonazepam])                          | text (number)                                                                                       |   |     |   |    |
| 277 | meds_14_2<br>Show the field ONLY if:<br>[meds_14] = "1"                  | Frequency (times per day)<br>(Klonopin [clonazepam])          | text (number)                                                                                       |   |     |   |    |
| 278 | meds_15<br>Show the field ONLY if:<br>[covid_1] = "1" OR [covid_1] = "3" | Seroquel (quetiapine fumarate)                                | yesno<br><table border="1"> <tr><td>1</td><td>Yes</td></tr> <tr><td>0</td><td>No</td></tr> </table> | 1 | Yes | 0 | No |
| 1   | Yes                                                                      |                                                               |                                                                                                     |   |     |   |    |
| 0   | No                                                                       |                                                               |                                                                                                     |   |     |   |    |
| 279 | meds_15_1<br>Show the field ONLY if:<br>[meds_15] = "1"                  | Dose (mg)<br>(Seroquel [quetiapine fumarate])                 | text (number)                                                                                       |   |     |   |    |
| 280 | meds_15_2<br>Show the field ONLY if:<br>[meds_15] = "1"                  | Frequency (times per day)<br>(Seroquel [quetiapine fumarate]) | text (number)                                                                                       |   |     |   |    |
| 281 | meds_16<br>Show the field ONLY if:<br>[covid_1] = "1" OR [covid_1] = "3" | Valium (lorazepam)                                            | yesno<br><table border="1"> <tr><td>1</td><td>Yes</td></tr> <tr><td>0</td><td>No</td></tr> </table> | 1 | Yes | 0 | No |
| 1   | Yes                                                                      |                                                               |                                                                                                     |   |     |   |    |
| 0   | No                                                                       |                                                               |                                                                                                     |   |     |   |    |

|     |                                                                          |                                                                                                                                                      |                        |
|-----|--------------------------------------------------------------------------|------------------------------------------------------------------------------------------------------------------------------------------------------|------------------------|
| 282 | meds_16_1<br>Show the field ONLY if:<br>[meds_16] = "1"                  | Dose (mg)<br>(Valium [lorazepam])                                                                                                                    | text (number)          |
| 283 | meds_16_2<br>Show the field ONLY if:<br>[meds_16] = "1"                  | Frequency (times per day)<br>(Valium [lorazepam])                                                                                                    | text (number)          |
| 284 | meds_17<br>Show the field ONLY if:<br>[covid_1] = "1" OR [covid_1] = "3" | Neupro (rotigotine)                                                                                                                                  | yesno<br>1 Yes<br>0 No |
| 285 | meds_17_1<br>Show the field ONLY if:<br>[meds_17] = "1"                  | Dose (mg)<br>(Neupro [rotigotine])                                                                                                                   | text (number)          |
| 286 | meds_17_2<br>Show the field ONLY if:<br>[meds_17] = "1"                  | Frequency (times per day)<br>(Neupro [rotigotine])                                                                                                   | text (number)          |
| 287 | meds_18<br>Show the field ONLY if:<br>[covid_1] = "1" OR [covid_1] = "3" | Rytary                                                                                                                                               | yesno<br>1 Yes<br>0 No |
| 288 | meds_18_1<br>Show the field ONLY if:<br>[meds_18] = "1"                  | Dose (mg)<br>(Rytary)                                                                                                                                | text (number)          |
| 289 | meds_18_2<br>Show the field ONLY if:<br>[meds_18] = "1"                  | Frequency (times per day)<br>(Rytary)                                                                                                                | text (number)          |
| 290 | meds_19<br>Show the field ONLY if:<br>[covid_1] = "1" OR [covid_1] = "3" | Duopa                                                                                                                                                | yesno<br>1 Yes<br>0 No |
| 291 | meds_19_1<br>Show the field ONLY if:<br>[meds_19] = "1"                  | Dose (mg)<br>(Duopa)                                                                                                                                 | text (number)          |
| 292 | meds_19_2<br>Show the field ONLY if:<br>[meds_19] = "1"                  | Frequency (times per day)<br>(Duopa)                                                                                                                 | text (number)          |
| 293 | meds_20<br>Show the field ONLY if:<br>[covid_1] = "1" OR [covid_1] = "3" | Other PD meds                                                                                                                                        | yesno<br>1 Yes<br>0 No |
| 294 | meds_20_1<br>Show the field ONLY if:<br>[meds_20] = "1"                  | Other PD meds                                                                                                                                        | text                   |
| 295 | meds_20_2<br>Show the field ONLY if:<br>[meds_20] = "1"                  | Dose (mg)<br>(Other PD meds)                                                                                                                         | text (number)          |
| 296 | meds_20_3<br>Show the field ONLY if:<br>[meds_20] = "1"                  | Frequency (times per day)<br>(Other PD meds)                                                                                                         | text (number)          |
| 297 | meds_21<br>Show the field ONLY if:<br>[covid_1] = "1" OR [covid_1] = "3" | Section Header: <i>Other non-PD medications (name, dose, frequency)</i><br>Antidepressants<br>Celexa, Lexapro, Luvox, Paxil, Prozac, Serzone, Zoloft | yesno<br>1 Yes<br>0 No |

|     |                                                                          |                                                                                          |                                                                                                     |   |     |   |    |
|-----|--------------------------------------------------------------------------|------------------------------------------------------------------------------------------|-----------------------------------------------------------------------------------------------------|---|-----|---|----|
| 298 | meds_21_1<br>Show the field ONLY if:<br>[meds_21] = "1"                  | Celexa, Lexapro, Luvox, Paxil, Prozac Serzone, Zoloft                                    | text                                                                                                |   |     |   |    |
| 299 | meds_21_2<br>Show the field ONLY if:<br>[meds_21] = "1"                  | Dose (mg)<br><br>(Celexa, Lexapro, Luvox, Paxil, Prozac Serzone, Zoloft)                 | text (number)                                                                                       |   |     |   |    |
| 300 | meds_21_3<br>Show the field ONLY if:<br>[meds_21] = "1"                  | Frequency (times per day)<br><br>(Celexa, Lexapro, Luvox, Paxil, Prozac Serzone, Zoloft) | text (number)                                                                                       |   |     |   |    |
| 301 | meds_22<br>Show the field ONLY if:<br>[covid_1] = "1" OR [covid_1] = "3" | Wellbutrin                                                                               | yesno<br><table border="1"> <tr><td>1</td><td>Yes</td></tr> <tr><td>0</td><td>No</td></tr> </table> | 1 | Yes | 0 | No |
| 1   | Yes                                                                      |                                                                                          |                                                                                                     |   |     |   |    |
| 0   | No                                                                       |                                                                                          |                                                                                                     |   |     |   |    |
| 302 | meds_22_1<br>Show the field ONLY if:<br>[meds_22] = "1"                  | Dose (mg)<br><br>(Wellbutrin)                                                            | text (number)                                                                                       |   |     |   |    |
| 303 | meds_22_2<br>Show the field ONLY if:<br>[meds_22] = "1"                  | Frequency (times per day)<br><br>(Wellbutrin)                                            | text (number)                                                                                       |   |     |   |    |
| 304 | meds_23<br>Show the field ONLY if:<br>[covid_1] = "1" OR [covid_1] = "3" | Effexor                                                                                  | yesno<br><table border="1"> <tr><td>1</td><td>Yes</td></tr> <tr><td>0</td><td>No</td></tr> </table> | 1 | Yes | 0 | No |
| 1   | Yes                                                                      |                                                                                          |                                                                                                     |   |     |   |    |
| 0   | No                                                                       |                                                                                          |                                                                                                     |   |     |   |    |
| 305 | meds_23_1<br>Show the field ONLY if:<br>[meds_23] = "1"                  | Dose (mg)<br><br>(Effexor)                                                               | text (number)                                                                                       |   |     |   |    |
| 306 | meds_23_2<br>Show the field ONLY if:<br>[meds_23] = "1"                  | Frequency (times per day)<br><br>(Effexor)                                               | text (number)                                                                                       |   |     |   |    |
| 307 | meds_24<br>Show the field ONLY if:<br>[covid_1] = "1" OR [covid_1] = "3" | Cymbalta                                                                                 | yesno<br><table border="1"> <tr><td>1</td><td>Yes</td></tr> <tr><td>0</td><td>No</td></tr> </table> | 1 | Yes | 0 | No |
| 1   | Yes                                                                      |                                                                                          |                                                                                                     |   |     |   |    |
| 0   | No                                                                       |                                                                                          |                                                                                                     |   |     |   |    |
| 308 | meds_24_1<br>Show the field ONLY if:<br>[meds_24] = "1"                  | Dose (mg)<br><br>(Cymbalta)                                                              | text (number)                                                                                       |   |     |   |    |
| 309 | meds_24_2<br>Show the field ONLY if:<br>[meds_24] = "1"                  | Frequency (times per day)<br><br>(Cymbalta)                                              | text (number)                                                                                       |   |     |   |    |
| 310 | meds_25<br>Show the field ONLY if:<br>[covid_1] = "1" OR [covid_1] = "3" | MAO inhibitor (Parnate, Nardil, Marplan)                                                 | yesno<br><table border="1"> <tr><td>1</td><td>Yes</td></tr> <tr><td>0</td><td>No</td></tr> </table> | 1 | Yes | 0 | No |
| 1   | Yes                                                                      |                                                                                          |                                                                                                     |   |     |   |    |
| 0   | No                                                                       |                                                                                          |                                                                                                     |   |     |   |    |
| 311 | meds_25_1<br>Show the field ONLY if:<br>[meds_25] = "1"                  | MAO inhibitor (Parnate, Nardil, Marplan)                                                 | text                                                                                                |   |     |   |    |
| 312 | meds_25_2<br>Show the field ONLY if:<br>[meds_25] = "1"                  | Dose (mg)<br><br>(MAO inhibitor [Parnate, Nardil, Marplan])                              | text (number)                                                                                       |   |     |   |    |
| 313 | meds_25_3<br>Show the field ONLY if:<br>[meds_25] = "1"                  | Frequency (times per day)<br><br>(MAO inhibitor [Parnate, Nardil, Marplan])              | text (number)                                                                                       |   |     |   |    |

|     |                                                                                      |                                                                                                                                                                                                                                                                |                                                                                                               |   |     |   |    |
|-----|--------------------------------------------------------------------------------------|----------------------------------------------------------------------------------------------------------------------------------------------------------------------------------------------------------------------------------------------------------------|---------------------------------------------------------------------------------------------------------------|---|-----|---|----|
| 314 | <p>meds_26</p> <p>Show the field ONLY if:<br/>[covid_1] = "1" OR [covid_1] = "3"</p> | <p>Amitriptyline (Elavil, Vanatrip), Clomipramine (Anafranil), Desipramine (Norpramin), Doxepin (Sinequan), Imipramine (Tofranil), Nortriptyline (Aventyl, Pamelor), Protryptiline (Vivactil), Trimipramine (Surmontil)</p>                                    | <p>yesno</p> <table border="1"> <tr> <td>1</td> <td>Yes</td> </tr> <tr> <td>0</td> <td>No</td> </tr> </table> | 1 | Yes | 0 | No |
| 1   | Yes                                                                                  |                                                                                                                                                                                                                                                                |                                                                                                               |   |     |   |    |
| 0   | No                                                                                   |                                                                                                                                                                                                                                                                |                                                                                                               |   |     |   |    |
| 315 | <p>meds_26_1</p> <p>Show the field ONLY if:<br/>[meds_26] = "1"</p>                  | <p>Amitriptyline (Elavil, Vanatrip), Clomipramine (Anafranil), Desipramine (Norpramin), Doxepin (Sinequan), Imipramine (Tofranil), Nortriptyline (Aventyl, Pamelor), Protryptiline (Vivactil), Trimipramine (Surmontil)</p>                                    | text                                                                                                          |   |     |   |    |
| 316 | <p>meds_26_2</p> <p>Show the field ONLY if:<br/>[meds_26] = "1"</p>                  | <p>Dose (mg)</p> <p>[Amitriptyline (Elavil, Vanatrip), Clomipramine (Anafranil), Desipramine (Norpramin), Doxepin (Sinequan), Imipramine (Tofranil), Nortriptyline (Aventyl, Pamelor), Protryptiline (Vivactil), Trimipramine (Surmontil)]</p>                 | text (number)                                                                                                 |   |     |   |    |
| 317 | <p>meds_26_3</p> <p>Show the field ONLY if:<br/>[meds_26] = "1"</p>                  | <p>Frequency (times per day)</p> <p>[Amitriptyline (Elavil, Vanatrip), Clomipramine (Anafranil), Desipramine (Norpramin), Doxepin (Sinequan), Imipramine (Tofranil), Nortriptyline (Aventyl, Pamelor), Protryptiline (Vivactil), Trimipramine (Surmontil)]</p> | text (number)                                                                                                 |   |     |   |    |
| 318 | <p>meds_27</p> <p>Show the field ONLY if:<br/>[covid_1] = "1" OR [covid_1] = "3"</p> | <p>Neuroleptics/antipsychotics</p> <p>Chlorpromazine (Thorazine), Fluphenazine (Prolixin), Haloperidol (Haldol), Thiothixene (Navane), Trifluoperazine (Stelazine), Perphenazine (Trilafon), and Thioridazine (Mellaril)</p>                                   | <p>yesno</p> <table border="1"> <tr> <td>1</td> <td>Yes</td> </tr> <tr> <td>0</td> <td>No</td> </tr> </table> | 1 | Yes | 0 | No |
| 1   | Yes                                                                                  |                                                                                                                                                                                                                                                                |                                                                                                               |   |     |   |    |
| 0   | No                                                                                   |                                                                                                                                                                                                                                                                |                                                                                                               |   |     |   |    |
| 319 | <p>meds_27_1</p> <p>Show the field ONLY if:<br/>[meds_27] = "1"</p>                  | <p>Chlorpromazine (Thorazine), Fluphenazine (Prolixin), Haloperidol (Haldol), Thiothixene (Navane), Trifluoperazine (Stelazine), Perphenazine (Trilafon), and Thioridazine (Mellaril)</p>                                                                      | text                                                                                                          |   |     |   |    |
| 320 | <p>meds_27_2</p> <p>Show the field ONLY if:<br/>[meds_27] = "1"</p>                  | <p>Dose (mg)</p> <p>[Chlorpromazine (Thorazine), Fluphenazine (Prolixin), Haloperidol (Haldol), Thiothixene (Navane), Trifluoperazine (Stelazine), Perphenazine (Trilafon), and Thioridazine (Mellaril)]</p>                                                   | text (number)                                                                                                 |   |     |   |    |
| 321 | <p>meds_27_3</p> <p>Show the field ONLY if:<br/>[meds_27] = "1"</p>                  | <p>Frequency (times per day)</p> <p>[Chlorpromazine (Thorazine), Fluphenazine (Prolixin), Haloperidol (Haldol), Thiothixene (Navane), Trifluoperazine (Stelazine), Perphenazine (Trilafon), and Thioridazine (Mellaril)]</p>                                   | text (number)                                                                                                 |   |     |   |    |
| 322 | <p>meds_28</p> <p>Show the field ONLY if:<br/>[covid_1] = "1" OR [covid_1] = "3"</p> | <p>Aripiprazole (Abilify), Risperidone (Risperdal), Olanzapine (Zyprexa), and Ziprasidone (Geodon)</p>                                                                                                                                                         | <p>yesno</p> <table border="1"> <tr> <td>1</td> <td>Yes</td> </tr> <tr> <td>0</td> <td>No</td> </tr> </table> | 1 | Yes | 0 | No |
| 1   | Yes                                                                                  |                                                                                                                                                                                                                                                                |                                                                                                               |   |     |   |    |
| 0   | No                                                                                   |                                                                                                                                                                                                                                                                |                                                                                                               |   |     |   |    |
| 323 | <p>meds_28_1</p> <p>Show the field ONLY if:<br/>[meds_28] = "1"</p>                  | <p>Aripiprazole (Abilify), Risperidone (Risperdal), Olanzapine (Zyprexa), and Ziprasidone (Geodon)</p>                                                                                                                                                         | text                                                                                                          |   |     |   |    |



|     |                                                                          |                                                                                                                                |                                                                                                           |   |     |   |    |
|-----|--------------------------------------------------------------------------|--------------------------------------------------------------------------------------------------------------------------------|-----------------------------------------------------------------------------------------------------------|---|-----|---|----|
| 324 | meds_28_2<br>Show the field ONLY if:<br>[meds_28] = "1"                  | Dose (mg)<br>[Aripiprazole (Abilify), Risperidone (Risperdal), Olanzapine (Zyprexa), and Ziprasidone (Geodon)]                 | text (number)                                                                                             |   |     |   |    |
| 325 | meds_28_3<br>Show the field ONLY if:<br>[meds_28] = "1"                  | Frequency (times per day)<br>[Aripiprazole (Abilify), Risperidone (Risperdal), Olanzapine (Zyprexa), and Ziprasidone (Geodon)] | text (number)                                                                                             |   |     |   |    |
| 326 | meds_29<br>Show the field ONLY if:<br>[covid_1] = "1" OR [covid_1] = "3" | Clozapine (Clozaril), Quetiapine (Seroquel)                                                                                    | yesno<br><table border="1"> <tr> <td>1</td> <td>Yes</td> </tr> <tr> <td>0</td> <td>No</td> </tr> </table> | 1 | Yes | 0 | No |
| 1   | Yes                                                                      |                                                                                                                                |                                                                                                           |   |     |   |    |
| 0   | No                                                                       |                                                                                                                                |                                                                                                           |   |     |   |    |
| 327 | meds_29_1<br>Show the field ONLY if:<br>[meds_29] = "1"                  | Clozapine (Clozaril), Quetiapine (Seroquel)                                                                                    | text                                                                                                      |   |     |   |    |
| 328 | meds_29_2<br>Show the field ONLY if:<br>[meds_29] = "1"                  | Dose (mg)<br>[Clozapine (Clozaril), Quetiapine (Seroquel)]                                                                     | text (number)                                                                                             |   |     |   |    |
| 329 | meds_29_3<br>Show the field ONLY if:<br>[meds_29] = "1"                  | Frequency (times per day)<br>[Clozapine (Clozaril), Quetiapine (Seroquel)]                                                     | text (number)                                                                                             |   |     |   |    |
| 330 | meds_30<br>Show the field ONLY if:<br>[covid_1] = "1" OR [covid_1] = "3" | Aspirin or NSAIDS<br>Aspirin, Ecotrin, Excedrin, Anacin                                                                        | yesno<br><table border="1"> <tr> <td>1</td> <td>Yes</td> </tr> <tr> <td>0</td> <td>No</td> </tr> </table> | 1 | Yes | 0 | No |
| 1   | Yes                                                                      |                                                                                                                                |                                                                                                           |   |     |   |    |
| 0   | No                                                                       |                                                                                                                                |                                                                                                           |   |     |   |    |
| 331 | meds_30_1<br>Show the field ONLY if:<br>[meds_30] = "1"                  | Aspirin, Ecotrin, Excedrin, Anacin                                                                                             | text                                                                                                      |   |     |   |    |
| 332 | meds_30_2<br>Show the field ONLY if:<br>[meds_30] = "1"                  | Dose (mg)<br>(Aspirin, Ecotrin, Excedrin, Anacin)                                                                              | text (number)                                                                                             |   |     |   |    |
| 333 | meds_30_3<br>Show the field ONLY if:<br>[meds_30] = "1"                  | Frequency (times per day)<br>(Aspirin, Ecotrin, Excedrin, Anacin)                                                              | text (number)                                                                                             |   |     |   |    |
| 334 | meds_31<br>Show the field ONLY if:<br>[covid_1] = "1" OR [covid_1] = "3" | Orudis, Ketoprofen, Oruvail, Ansaid, Naprosyn, Anaprox, Naproxen, Naprolan, Aleve, Daypro or Toradol                           | yesno<br><table border="1"> <tr> <td>1</td> <td>Yes</td> </tr> <tr> <td>0</td> <td>No</td> </tr> </table> | 1 | Yes | 0 | No |
| 1   | Yes                                                                      |                                                                                                                                |                                                                                                           |   |     |   |    |
| 0   | No                                                                       |                                                                                                                                |                                                                                                           |   |     |   |    |
| 335 | meds_31_1<br>Show the field ONLY if:<br>[meds_31] = "1"                  | Orudis, Ketoprofen, Oruvail, Ansaid, Naprosyn, Anaprox, Naproxen, Naprolan, Aleve, Daypro or Toradol                           | text                                                                                                      |   |     |   |    |
| 336 | meds_31_2<br>Show the field ONLY if:<br>[meds_31] = "1"                  | Dose (mg)<br>(Orudis, Ketoprofen, Oruvail, Ansaid, Naprosyn, Anaprox, Naproxen, Naprolan, Aleve, Daypro or Toradol)            | text (number)                                                                                             |   |     |   |    |

|     |                                                                          |                                                                                                                                     |                                                                                                           |   |     |   |    |
|-----|--------------------------------------------------------------------------|-------------------------------------------------------------------------------------------------------------------------------------|-----------------------------------------------------------------------------------------------------------|---|-----|---|----|
| 337 | meds_31_3<br>Show the field ONLY if:<br>[meds_31] = "1"                  | Frequency (times per day)<br>(Orudis, Ketoprofen, Oruvail, Ansaid, Naprosyn, Anaprox, Naproxen, Naprolan, Aleve, Daypro or Toradol) | text (number)                                                                                             |   |     |   |    |
| 338 | meds_32<br>Show the field ONLY if:<br>[covid_1] = "1" OR [covid_1] = "3" | Indocin, Indomethacin, Clinoril, Sulindac, Lodine, Voltaren, Cataflam or Diclofenac                                                 | yesno<br><table border="1"> <tr> <td>1</td> <td>Yes</td> </tr> <tr> <td>0</td> <td>No</td> </tr> </table> | 1 | Yes | 0 | No |
| 1   | Yes                                                                      |                                                                                                                                     |                                                                                                           |   |     |   |    |
| 0   | No                                                                       |                                                                                                                                     |                                                                                                           |   |     |   |    |
| 339 | meds_32_1<br>Show the field ONLY if:<br>[meds_32] = "1"                  | Indocin, Indomethacin, Clinoril, Sulindac, Lodine, Voltaren, Cataflam or Diclofenac                                                 | text                                                                                                      |   |     |   |    |
| 340 | meds_32_2<br>Show the field ONLY if:<br>[meds_32] = "1"                  | Dose (mg)<br>(Indocin, Indomethacin, Clinoril, Sulindac, Lodine, Voltaren, Cataflam or Diclofenac)                                  | text (number)                                                                                             |   |     |   |    |
| 341 | meds_32_3<br>Show the field ONLY if:<br>[meds_32] = "1"                  | Frequency (times per day)<br>(Indocin, Indomethacin, Clinoril, Sulindac, Lodine, Voltaren, Cataflam or Diclofenac)                  | text (number)                                                                                             |   |     |   |    |
| 342 | meds_33<br>Show the field ONLY if:<br>[covid_1] = "1" OR [covid_1] = "3" | Celebrex, Vioxx, Bextra or Relafen                                                                                                  | yesno<br><table border="1"> <tr> <td>1</td> <td>Yes</td> </tr> <tr> <td>0</td> <td>No</td> </tr> </table> | 1 | Yes | 0 | No |
| 1   | Yes                                                                      |                                                                                                                                     |                                                                                                           |   |     |   |    |
| 0   | No                                                                       |                                                                                                                                     |                                                                                                           |   |     |   |    |
| 343 | meds_33_1<br>Show the field ONLY if:<br>[meds_33] = "1"                  | Celebrex, Vioxx, Bextra or Relafen                                                                                                  | text                                                                                                      |   |     |   |    |
| 344 | meds_33_2<br>Show the field ONLY if:<br>[meds_33] = "1"                  | Dose (mg)<br>(Celebrex, Vioxx, Bextra or Relafen)                                                                                   | text (number)                                                                                             |   |     |   |    |
| 345 | meds_33_3<br>Show the field ONLY if:<br>[meds_33] = "1"                  | Frequency (times per day)<br>(Celebrex, Vioxx, Bextra or Relafen)                                                                   | text (number)                                                                                             |   |     |   |    |
| 346 | meds_34<br>Show the field ONLY if:<br>[covid_1] = "1" OR [covid_1] = "3" | Statins<br>Lipitor, Zocor, Pravachol, Lescol, Crestor, Mevacor (--statin)                                                           | yesno<br><table border="1"> <tr> <td>1</td> <td>Yes</td> </tr> <tr> <td>0</td> <td>No</td> </tr> </table> | 1 | Yes | 0 | No |
| 1   | Yes                                                                      |                                                                                                                                     |                                                                                                           |   |     |   |    |
| 0   | No                                                                       |                                                                                                                                     |                                                                                                           |   |     |   |    |
| 347 | meds_34_1<br>Show the field ONLY if:<br>[meds_34] = "1"                  | Lipitor, Zocor, Pravachol, Lescol, Crestor, Mevacor (--statin)                                                                      | text                                                                                                      |   |     |   |    |
| 348 | meds_34_2<br>Show the field ONLY if:<br>[meds_34] = "1"                  | Dose (mg)<br>Lipitor, Zocor, Pravachol, Lescol, Crestor, Mevacor (--statin)]                                                        | text (number)                                                                                             |   |     |   |    |

|     |                                                                             |                                                                                                                                              |                                                                                                           |   |     |   |    |
|-----|-----------------------------------------------------------------------------|----------------------------------------------------------------------------------------------------------------------------------------------|-----------------------------------------------------------------------------------------------------------|---|-----|---|----|
| 349 | meds_34_3<br>Show the field ONLY if:<br>[meds_34] = "1"                     | Frequency (times per day)<br>Lipitor, Zocor, Pravachol, Lescol, Crestor,<br>Mevacor (--statin)[                                              | text (number)                                                                                             |   |     |   |    |
| 350 | meds_35<br>Show the field ONLY if:<br>[covid_1] = "1" OR [covid_1] =<br>"3" | Other<br>SUPPLEMENTS<br>Ginko Biloba                                                                                                         | yesno<br><table border="1"> <tr> <td>1</td> <td>Yes</td> </tr> <tr> <td>0</td> <td>No</td> </tr> </table> | 1 | Yes | 0 | No |
| 1   | Yes                                                                         |                                                                                                                                              |                                                                                                           |   |     |   |    |
| 0   | No                                                                          |                                                                                                                                              |                                                                                                           |   |     |   |    |
| 351 | meds_35_1<br>Show the field ONLY if:<br>[meds_35] = "1"                     | Dose (specify unit of measurement)<br>(Ginko Biloba)                                                                                         | text                                                                                                      |   |     |   |    |
| 352 | meds_35_2<br>Show the field ONLY if:<br>[meds_35] = "1"                     | Frequency (specify times per day/week/month)<br>(Ginko Biloba)                                                                               | text                                                                                                      |   |     |   |    |
| 353 | meds_36<br>Show the field ONLY if:<br>[covid_1] = "1" OR [covid_1] =<br>"3" | Coenzyme Q10                                                                                                                                 | yesno<br><table border="1"> <tr> <td>1</td> <td>Yes</td> </tr> <tr> <td>0</td> <td>No</td> </tr> </table> | 1 | Yes | 0 | No |
| 1   | Yes                                                                         |                                                                                                                                              |                                                                                                           |   |     |   |    |
| 0   | No                                                                          |                                                                                                                                              |                                                                                                           |   |     |   |    |
| 354 | meds_36_1<br>Show the field ONLY if:<br>[meds_36] = "1"                     | Dose (specify unit of measurement)<br>(Coenzyme Q10)                                                                                         | text                                                                                                      |   |     |   |    |
| 355 | meds_36_2<br>Show the field ONLY if:<br>[meds_36] = "1"                     | Frequency (specify times per day/week/month)<br>(Coenzyme Q10)                                                                               | text                                                                                                      |   |     |   |    |
| 356 | meds_37<br>Show the field ONLY if:<br>[covid_1] = "1" OR [covid_1] =<br>"3" | Mutivitamin (such as One-a-day, stress tabs,<br>theragram, centrum, generic multivitamins)                                                   | yesno<br><table border="1"> <tr> <td>1</td> <td>Yes</td> </tr> <tr> <td>0</td> <td>No</td> </tr> </table> | 1 | Yes | 0 | No |
| 1   | Yes                                                                         |                                                                                                                                              |                                                                                                           |   |     |   |    |
| 0   | No                                                                          |                                                                                                                                              |                                                                                                           |   |     |   |    |
| 357 | meds_37_1<br>Show the field ONLY if:<br>[meds_37] = "1"                     | Mutivitamin (such as One-a-day, stress tabs,<br>theragram, centrum, generic multivitamins)                                                   | text                                                                                                      |   |     |   |    |
| 358 | meds_37_2<br>Show the field ONLY if:<br>[meds_37] = "1"                     | Dose (specify unit of measurement)<br>[Mutivitamin (such as One-a-day, stress tabs,<br>theragram, centrum, generic multivitamins)]           | text                                                                                                      |   |     |   |    |
| 359 | meds_37_3<br>Show the field ONLY if:<br>[meds_37] = "1"                     | Frequency (specify times per day/week/month)<br>[Mutivitamin (such as One-a-day, stress tabs,<br>theragram, centrum, generic multivitamins)] | text                                                                                                      |   |     |   |    |

|     |                                                                          |                                                             |                                                                                                           |   |     |   |    |
|-----|--------------------------------------------------------------------------|-------------------------------------------------------------|-----------------------------------------------------------------------------------------------------------|---|-----|---|----|
| 360 | meds_38<br>Show the field ONLY if:<br>[covid_1] = "1" OR [covid_1] = "3" | Vitamin C                                                   | yesno<br><table border="1"> <tr> <td>1</td> <td>Yes</td> </tr> <tr> <td>0</td> <td>No</td> </tr> </table> | 1 | Yes | 0 | No |
| 1   | Yes                                                                      |                                                             |                                                                                                           |   |     |   |    |
| 0   | No                                                                       |                                                             |                                                                                                           |   |     |   |    |
| 361 | meds_38_1<br>Show the field ONLY if:<br>[meds_38] = "1"                  | Dose (specify unit of measurement)<br>(Vitamin C)           | text                                                                                                      |   |     |   |    |
| 362 | meds_38_2<br>Show the field ONLY if:<br>[meds_38] = "1"                  | Frequency (specify times per day/week/month)<br>(Vitamin C) | text                                                                                                      |   |     |   |    |
| 363 | meds_39<br>Show the field ONLY if:<br>[covid_1] = "1" OR [covid_1] = "3" | Vitamin E                                                   | yesno<br><table border="1"> <tr> <td>1</td> <td>Yes</td> </tr> <tr> <td>0</td> <td>No</td> </tr> </table> | 1 | Yes | 0 | No |
| 1   | Yes                                                                      |                                                             |                                                                                                           |   |     |   |    |
| 0   | No                                                                       |                                                             |                                                                                                           |   |     |   |    |
| 364 | meds_39_1<br>Show the field ONLY if:<br>[meds_39] = "1"                  | Dose (specify unit of measurement)<br>(Vitamin E)           | text                                                                                                      |   |     |   |    |
| 365 | meds_39_2<br>Show the field ONLY if:<br>[meds_39] = "1"                  | Frequency (specify times per day/week/month)<br>(Vitamin E) | text                                                                                                      |   |     |   |    |
| 366 | meds_40<br>Show the field ONLY if:<br>[covid_1] = "1" OR [covid_1] = "3" | B Complex                                                   | yesno<br><table border="1"> <tr> <td>1</td> <td>Yes</td> </tr> <tr> <td>0</td> <td>No</td> </tr> </table> | 1 | Yes | 0 | No |
| 1   | Yes                                                                      |                                                             |                                                                                                           |   |     |   |    |
| 0   | No                                                                       |                                                             |                                                                                                           |   |     |   |    |
| 367 | meds_40_1<br>Show the field ONLY if:<br>[meds_40] = "1"                  | Dose (specify unit of measurement)<br>(B Complex)           | text                                                                                                      |   |     |   |    |
| 368 | meds_40_2<br>Show the field ONLY if:<br>[meds_40] = "1"                  | Frequency (specify times per day/week/month)<br>(B Complex) | text                                                                                                      |   |     |   |    |
| 369 | meds_41<br>Show the field ONLY if:<br>[covid_1] = "1" OR [covid_1] = "3" | Zinc                                                        | yesno<br><table border="1"> <tr> <td>1</td> <td>Yes</td> </tr> <tr> <td>0</td> <td>No</td> </tr> </table> | 1 | Yes | 0 | No |
| 1   | Yes                                                                      |                                                             |                                                                                                           |   |     |   |    |
| 0   | No                                                                       |                                                             |                                                                                                           |   |     |   |    |
| 370 | meds_41_1<br>Show the field ONLY if:<br>[meds_41] = "1"                  | Dose (specify unit of measurement)<br>(Zinc)                | text                                                                                                      |   |     |   |    |
| 371 | meds_41_2<br>Show the field ONLY if:<br>[meds_41] = "1"                  | Frequency (specify times per day/week/month)<br>(Zinc)      | text                                                                                                      |   |     |   |    |

|     |                                                                          |                                                              |                                                                                                           |   |     |   |    |
|-----|--------------------------------------------------------------------------|--------------------------------------------------------------|-----------------------------------------------------------------------------------------------------------|---|-----|---|----|
| 372 | meds_42<br>Show the field ONLY if:<br>[covid_1] = "1" OR [covid_1] = "3" | Other I.                                                     | yesno<br><table border="1"> <tr> <td>1</td> <td>Yes</td> </tr> <tr> <td>0</td> <td>No</td> </tr> </table> | 1 | Yes | 0 | No |
| 1   | Yes                                                                      |                                                              |                                                                                                           |   |     |   |    |
| 0   | No                                                                       |                                                              |                                                                                                           |   |     |   |    |
| 373 | meds_42_1<br>Show the field ONLY if:<br>[meds_42] = "1"                  | Other I.                                                     | text                                                                                                      |   |     |   |    |
| 374 | meds_42_2<br>Show the field ONLY if:<br>[meds_42] = "1"                  | Dose (specify unit of measurement)<br>(Other I.)             | text                                                                                                      |   |     |   |    |
| 375 | meds_42_3<br>Show the field ONLY if:<br>[meds_42] = "1"                  | Frequency (specify times per day/week/month)<br>(Other I.)   | text                                                                                                      |   |     |   |    |
| 376 | meds_43<br>Show the field ONLY if:<br>[covid_1] = "1" OR [covid_1] = "3" | Other II.                                                    | yesno<br><table border="1"> <tr> <td>1</td> <td>Yes</td> </tr> <tr> <td>0</td> <td>No</td> </tr> </table> | 1 | Yes | 0 | No |
| 1   | Yes                                                                      |                                                              |                                                                                                           |   |     |   |    |
| 0   | No                                                                       |                                                              |                                                                                                           |   |     |   |    |
| 377 | meds_43_1<br>Show the field ONLY if:<br>[meds_43] = "1"                  | Other II.                                                    | text                                                                                                      |   |     |   |    |
| 378 | meds_43_2<br>Show the field ONLY if:<br>[meds_43] = "1"                  | Dose (specify unit of measurement)<br>(Other II.)            | text                                                                                                      |   |     |   |    |
| 379 | meds_43_3<br>Show the field ONLY if:<br>[meds_43] = "1"                  | Frequency (specify times per day/week/month)<br>(Other II.)  | text                                                                                                      |   |     |   |    |
| 380 | meds_44<br>Show the field ONLY if:<br>[covid_1] = "1" OR [covid_1] = "3" | Other III.                                                   | yesno<br><table border="1"> <tr> <td>1</td> <td>Yes</td> </tr> <tr> <td>0</td> <td>No</td> </tr> </table> | 1 | Yes | 0 | No |
| 1   | Yes                                                                      |                                                              |                                                                                                           |   |     |   |    |
| 0   | No                                                                       |                                                              |                                                                                                           |   |     |   |    |
| 381 | meds_44_1<br>Show the field ONLY if:<br>[meds_44] = "1"                  | Other III.                                                   | text                                                                                                      |   |     |   |    |
| 382 | meds_44_2<br>Show the field ONLY if:<br>[meds_44] = "1"                  | Dose (specify unit of measurement)<br>(Other III.)           | text                                                                                                      |   |     |   |    |
| 383 | meds_44_3<br>Show the field ONLY if:<br>[meds_44] = "1"                  | Frequency (specify times per day/week/month)<br>(Other III.) | text                                                                                                      |   |     |   |    |
| 384 | meds_45<br>Show the field ONLY if:<br>[covid_1] = "1" OR [covid_1] = "3" | Other IV.                                                    | yesno<br><table border="1"> <tr> <td>1</td> <td>Yes</td> </tr> <tr> <td>0</td> <td>No</td> </tr> </table> | 1 | Yes | 0 | No |
| 1   | Yes                                                                      |                                                              |                                                                                                           |   |     |   |    |
| 0   | No                                                                       |                                                              |                                                                                                           |   |     |   |    |
| 385 | meds_45_1<br>Show the field ONLY if:<br>[meds_45] = "1"                  | Other IV.                                                    | text                                                                                                      |   |     |   |    |
| 386 | meds_45_2<br>Show the field ONLY if:<br>[meds_45] = "1"                  | Dose (specify unit of measurement)<br>(Other IV.)            | text                                                                                                      |   |     |   |    |
| 387 | meds_45_3<br>Show the field ONLY if:<br>[meds_45] = "1"                  | Frequency (specify times per day/week/month)<br>(Other IV.)  | text                                                                                                      |   |     |   |    |

|     |                                                                          |                                                               |                        |
|-----|--------------------------------------------------------------------------|---------------------------------------------------------------|------------------------|
| 388 | meds_46<br>Show the field ONLY if:<br>[covid_1] = "1" OR [covid_1] = "3" | Other V.                                                      | yesno<br>1 Yes<br>0 No |
| 389 | meds_46_1<br>Show the field ONLY if:<br>[meds_46] = "1"                  | Other V.                                                      | text                   |
| 390 | meds_46_2<br>Show the field ONLY if:<br>[meds_46] = "1"                  | Dose (specify unit of measurement)<br>(Other V.)              | text                   |
| 391 | meds_46_3<br>Show the field ONLY if:<br>[meds_46] = "1"                  | Frequency (specify times per day/week/month)<br>(Other V.)    | text                   |
| 392 | meds_47<br>Show the field ONLY if:<br>[covid_1] = "1" OR [covid_1] = "3" | Other VI.                                                     | yesno<br>1 Yes<br>0 No |
| 393 | meds_47_1<br>Show the field ONLY if:<br>[meds_47] = "1"                  | Other VI.                                                     | text                   |
| 394 | meds_47_2<br>Show the field ONLY if:<br>[meds_47] = "1"                  | Dose (specify unit of measurement)<br>(Other VI.)             | text                   |
| 395 | meds_47_3<br>Show the field ONLY if:<br>[meds_47] = "1"                  | Frequency (specify times per day/week/month)<br>(Other VI.)   | text                   |
| 396 | meds_48<br>Show the field ONLY if:<br>[covid_1] = "1" OR [covid_1] = "3" | Other VII.                                                    | yesno<br>1 Yes<br>0 No |
| 397 | meds_48_1<br>Show the field ONLY if:<br>[meds_48] = "1"                  | Other VII.                                                    | text                   |
| 398 | meds_48_2<br>Show the field ONLY if:<br>[meds_48] = "1"                  | Dose (specify unit of measurement)<br>(Other VII.)            | text                   |
| 399 | meds_48_3<br>Show the field ONLY if:<br>[meds_48] = "1"                  | Frequency (specify times per day/week/month)<br>(Other VII.)  | text                   |
| 400 | meds_49<br>Show the field ONLY if:<br>[covid_1] = "1" OR [covid_1] = "3" | Other VIII.                                                   | yesno<br>1 Yes<br>0 No |
| 401 | meds_49_1<br>Show the field ONLY if:<br>[meds_49] = "1"                  | Other VIII.                                                   | text                   |
| 402 | meds_49_2<br>Show the field ONLY if:<br>[meds_49] = "1"                  | Dose (specify unit of measurement)<br>(Other VIII.)           | text                   |
| 403 | meds_49_3<br>Show the field ONLY if:<br>[meds_49] = "1"                  | Frequency (specify times per day/week/month)<br>(Other VIII.) | text                   |

|     |                                                                                                                                               |                                                                                                                                                              |                                                                                                                                                                                                                                                                                                                                                                            |   |                 |   |                                                    |   |                                     |   |                                   |   |                                     |
|-----|-----------------------------------------------------------------------------------------------------------------------------------------------|--------------------------------------------------------------------------------------------------------------------------------------------------------------|----------------------------------------------------------------------------------------------------------------------------------------------------------------------------------------------------------------------------------------------------------------------------------------------------------------------------------------------------------------------------|---|-----------------|---|----------------------------------------------------|---|-------------------------------------|---|-----------------------------------|---|-------------------------------------|
| 404 | <p>pdcovidsympt_1_2</p> <p>Show the field ONLY if:<br/>[covid_1] = "1" OR [covid_1] = "3"</p>                                                 | <p>Section Header: <i>(Motor symptom changes) Has any of the following symptoms changed because of COVID?</i></p> <p>Bradykinesia (slowness in movement)</p> | <p>radio (Matrix)</p> <table border="1"> <tr><td>0</td><td>0=Never present</td></tr> <tr><td>1</td><td>1= Never present before COVID, present after COVID</td></tr> <tr><td>2</td><td>2=Present before COVID, Less severe</td></tr> <tr><td>3</td><td>3=Present before COVID, Unchanged</td></tr> <tr><td>4</td><td>4=Present before COVID, More severe</td></tr> </table> | 0 | 0=Never present | 1 | 1= Never present before COVID, present after COVID | 2 | 2=Present before COVID, Less severe | 3 | 3=Present before COVID, Unchanged | 4 | 4=Present before COVID, More severe |
| 0   | 0=Never present                                                                                                                               |                                                                                                                                                              |                                                                                                                                                                                                                                                                                                                                                                            |   |                 |   |                                                    |   |                                     |   |                                   |   |                                     |
| 1   | 1= Never present before COVID, present after COVID                                                                                            |                                                                                                                                                              |                                                                                                                                                                                                                                                                                                                                                                            |   |                 |   |                                                    |   |                                     |   |                                   |   |                                     |
| 2   | 2=Present before COVID, Less severe                                                                                                           |                                                                                                                                                              |                                                                                                                                                                                                                                                                                                                                                                            |   |                 |   |                                                    |   |                                     |   |                                   |   |                                     |
| 3   | 3=Present before COVID, Unchanged                                                                                                             |                                                                                                                                                              |                                                                                                                                                                                                                                                                                                                                                                            |   |                 |   |                                                    |   |                                     |   |                                   |   |                                     |
| 4   | 4=Present before COVID, More severe                                                                                                           |                                                                                                                                                              |                                                                                                                                                                                                                                                                                                                                                                            |   |                 |   |                                                    |   |                                     |   |                                   |   |                                     |
| 405 | <p>pdcovidsympt_1_3</p> <p>Show the field ONLY if:<br/>[covid_1] = "1" OR [covid_1] = "3"</p>                                                 | <p>Rigidity (stiffness)</p>                                                                                                                                  | <p>radio (Matrix)</p> <table border="1"> <tr><td>0</td><td>0=Never present</td></tr> <tr><td>1</td><td>1= Never present before COVID, present after COVID</td></tr> <tr><td>2</td><td>2=Present before COVID, Less severe</td></tr> <tr><td>3</td><td>3=Present before COVID, Unchanged</td></tr> <tr><td>4</td><td>4=Present before COVID, More severe</td></tr> </table> | 0 | 0=Never present | 1 | 1= Never present before COVID, present after COVID | 2 | 2=Present before COVID, Less severe | 3 | 3=Present before COVID, Unchanged | 4 | 4=Present before COVID, More severe |
| 0   | 0=Never present                                                                                                                               |                                                                                                                                                              |                                                                                                                                                                                                                                                                                                                                                                            |   |                 |   |                                                    |   |                                     |   |                                   |   |                                     |
| 1   | 1= Never present before COVID, present after COVID                                                                                            |                                                                                                                                                              |                                                                                                                                                                                                                                                                                                                                                                            |   |                 |   |                                                    |   |                                     |   |                                   |   |                                     |
| 2   | 2=Present before COVID, Less severe                                                                                                           |                                                                                                                                                              |                                                                                                                                                                                                                                                                                                                                                                            |   |                 |   |                                                    |   |                                     |   |                                   |   |                                     |
| 3   | 3=Present before COVID, Unchanged                                                                                                             |                                                                                                                                                              |                                                                                                                                                                                                                                                                                                                                                                            |   |                 |   |                                                    |   |                                     |   |                                   |   |                                     |
| 4   | 4=Present before COVID, More severe                                                                                                           |                                                                                                                                                              |                                                                                                                                                                                                                                                                                                                                                                            |   |                 |   |                                                    |   |                                     |   |                                   |   |                                     |
| 406 | <p>pdcovidsympt_1_7</p> <p>Show the field ONLY if:<br/>[covid_1] = "1" OR [covid_1] = "3"</p>                                                 | <p>Balance</p>                                                                                                                                               | <p>radio (Matrix)</p> <table border="1"> <tr><td>0</td><td>0=Never present</td></tr> <tr><td>1</td><td>1= Never present before COVID, present after COVID</td></tr> <tr><td>2</td><td>2=Present before COVID, Less severe</td></tr> <tr><td>3</td><td>3=Present before COVID, Unchanged</td></tr> <tr><td>4</td><td>4=Present before COVID, More severe</td></tr> </table> | 0 | 0=Never present | 1 | 1= Never present before COVID, present after COVID | 2 | 2=Present before COVID, Less severe | 3 | 3=Present before COVID, Unchanged | 4 | 4=Present before COVID, More severe |
| 0   | 0=Never present                                                                                                                               |                                                                                                                                                              |                                                                                                                                                                                                                                                                                                                                                                            |   |                 |   |                                                    |   |                                     |   |                                   |   |                                     |
| 1   | 1= Never present before COVID, present after COVID                                                                                            |                                                                                                                                                              |                                                                                                                                                                                                                                                                                                                                                                            |   |                 |   |                                                    |   |                                     |   |                                   |   |                                     |
| 2   | 2=Present before COVID, Less severe                                                                                                           |                                                                                                                                                              |                                                                                                                                                                                                                                                                                                                                                                            |   |                 |   |                                                    |   |                                     |   |                                   |   |                                     |
| 3   | 3=Present before COVID, Unchanged                                                                                                             |                                                                                                                                                              |                                                                                                                                                                                                                                                                                                                                                                            |   |                 |   |                                                    |   |                                     |   |                                   |   |                                     |
| 4   | 4=Present before COVID, More severe                                                                                                           |                                                                                                                                                              |                                                                                                                                                                                                                                                                                                                                                                            |   |                 |   |                                                    |   |                                     |   |                                   |   |                                     |
| 407 | <p>pdcovidsympt_1_8</p> <p>Show the field ONLY if:<br/>[covid_1] = "1" OR [covid_1] = "3"</p>                                                 | <p>Dyskinesias</p>                                                                                                                                           | <p>radio (Matrix)</p> <table border="1"> <tr><td>0</td><td>0=Never present</td></tr> <tr><td>1</td><td>1= Never present before COVID, present after COVID</td></tr> <tr><td>2</td><td>2=Present before COVID, Less severe</td></tr> <tr><td>3</td><td>3=Present before COVID, Unchanged</td></tr> <tr><td>4</td><td>4=Present before COVID, More severe</td></tr> </table> | 0 | 0=Never present | 1 | 1= Never present before COVID, present after COVID | 2 | 2=Present before COVID, Less severe | 3 | 3=Present before COVID, Unchanged | 4 | 4=Present before COVID, More severe |
| 0   | 0=Never present                                                                                                                               |                                                                                                                                                              |                                                                                                                                                                                                                                                                                                                                                                            |   |                 |   |                                                    |   |                                     |   |                                   |   |                                     |
| 1   | 1= Never present before COVID, present after COVID                                                                                            |                                                                                                                                                              |                                                                                                                                                                                                                                                                                                                                                                            |   |                 |   |                                                    |   |                                     |   |                                   |   |                                     |
| 2   | 2=Present before COVID, Less severe                                                                                                           |                                                                                                                                                              |                                                                                                                                                                                                                                                                                                                                                                            |   |                 |   |                                                    |   |                                     |   |                                   |   |                                     |
| 3   | 3=Present before COVID, Unchanged                                                                                                             |                                                                                                                                                              |                                                                                                                                                                                                                                                                                                                                                                            |   |                 |   |                                                    |   |                                     |   |                                   |   |                                     |
| 4   | 4=Present before COVID, More severe                                                                                                           |                                                                                                                                                              |                                                                                                                                                                                                                                                                                                                                                                            |   |                 |   |                                                    |   |                                     |   |                                   |   |                                     |
| 408 | <p>pdcovidsympt_1_9</p> <p>Show the field ONLY if:<br/>[covid_1] = "1" OR [covid_1] = "3"</p>                                                 | <p>Dystonia</p>                                                                                                                                              | <p>radio (Matrix)</p> <table border="1"> <tr><td>0</td><td>0=Never present</td></tr> <tr><td>1</td><td>1= Never present before COVID, present after COVID</td></tr> <tr><td>2</td><td>2=Present before COVID, Less severe</td></tr> <tr><td>3</td><td>3=Present before COVID, Unchanged</td></tr> <tr><td>4</td><td>4=Present before COVID, More severe</td></tr> </table> | 0 | 0=Never present | 1 | 1= Never present before COVID, present after COVID | 2 | 2=Present before COVID, Less severe | 3 | 3=Present before COVID, Unchanged | 4 | 4=Present before COVID, More severe |
| 0   | 0=Never present                                                                                                                               |                                                                                                                                                              |                                                                                                                                                                                                                                                                                                                                                                            |   |                 |   |                                                    |   |                                     |   |                                   |   |                                     |
| 1   | 1= Never present before COVID, present after COVID                                                                                            |                                                                                                                                                              |                                                                                                                                                                                                                                                                                                                                                                            |   |                 |   |                                                    |   |                                     |   |                                   |   |                                     |
| 2   | 2=Present before COVID, Less severe                                                                                                           |                                                                                                                                                              |                                                                                                                                                                                                                                                                                                                                                                            |   |                 |   |                                                    |   |                                     |   |                                   |   |                                     |
| 3   | 3=Present before COVID, Unchanged                                                                                                             |                                                                                                                                                              |                                                                                                                                                                                                                                                                                                                                                                            |   |                 |   |                                                    |   |                                     |   |                                   |   |                                     |
| 4   | 4=Present before COVID, More severe                                                                                                           |                                                                                                                                                              |                                                                                                                                                                                                                                                                                                                                                                            |   |                 |   |                                                    |   |                                     |   |                                   |   |                                     |
| 409 | <p>pdcovidsympt_1_10</p> <p>Show the field ONLY if:<br/>[covid_1] = "1" OR [covid_1] = "3"</p>                                                | <p>OFF time</p>                                                                                                                                              | <p>radio (Matrix)</p> <table border="1"> <tr><td>0</td><td>0=Never present</td></tr> <tr><td>1</td><td>1= Never present before COVID, present after COVID</td></tr> <tr><td>2</td><td>2=Present before COVID, Less severe</td></tr> <tr><td>3</td><td>3=Present before COVID, Unchanged</td></tr> <tr><td>4</td><td>4=Present before COVID, More severe</td></tr> </table> | 0 | 0=Never present | 1 | 1= Never present before COVID, present after COVID | 2 | 2=Present before COVID, Less severe | 3 | 3=Present before COVID, Unchanged | 4 | 4=Present before COVID, More severe |
| 0   | 0=Never present                                                                                                                               |                                                                                                                                                              |                                                                                                                                                                                                                                                                                                                                                                            |   |                 |   |                                                    |   |                                     |   |                                   |   |                                     |
| 1   | 1= Never present before COVID, present after COVID                                                                                            |                                                                                                                                                              |                                                                                                                                                                                                                                                                                                                                                                            |   |                 |   |                                                    |   |                                     |   |                                   |   |                                     |
| 2   | 2=Present before COVID, Less severe                                                                                                           |                                                                                                                                                              |                                                                                                                                                                                                                                                                                                                                                                            |   |                 |   |                                                    |   |                                     |   |                                   |   |                                     |
| 3   | 3=Present before COVID, Unchanged                                                                                                             |                                                                                                                                                              |                                                                                                                                                                                                                                                                                                                                                                            |   |                 |   |                                                    |   |                                     |   |                                   |   |                                     |
| 4   | 4=Present before COVID, More severe                                                                                                           |                                                                                                                                                              |                                                                                                                                                                                                                                                                                                                                                                            |   |                 |   |                                                    |   |                                     |   |                                   |   |                                     |
| 410 | <p>pdcovidsympt_1_2_1</p> <p>Show the field ONLY if:<br/>[pdcovidsympt_1_2] = "1" OR [pdcovidsympt_1_2] = "2" OR [pdcovidsympt_1_2] = "4"</p> | <p>Details (Bradykinesia (slowness in movement))</p>                                                                                                         | <p>notes</p>                                                                                                                                                                                                                                                                                                                                                               |   |                 |   |                                                    |   |                                     |   |                                   |   |                                     |
| 411 | <p>pdcovidsympt_1_3_1</p> <p>Show the field ONLY if:<br/>[pdcovidsympt_1_3] = "1" OR [pdcovidsympt_1_3] = "2" OR [pdcovidsympt_1_3] = "4"</p> | <p>Details (Rigidity (stiffness))</p>                                                                                                                        | <p>notes</p>                                                                                                                                                                                                                                                                                                                                                               |   |                 |   |                                                    |   |                                     |   |                                   |   |                                     |

|     |                                                                                                                                                           |                                                                                                                                                  |                                                                                                                                                                                                                                                                                                                                                                            |   |                 |   |                                                    |   |                                     |   |                                   |   |                                     |
|-----|-----------------------------------------------------------------------------------------------------------------------------------------------------------|--------------------------------------------------------------------------------------------------------------------------------------------------|----------------------------------------------------------------------------------------------------------------------------------------------------------------------------------------------------------------------------------------------------------------------------------------------------------------------------------------------------------------------------|---|-----------------|---|----------------------------------------------------|---|-------------------------------------|---|-----------------------------------|---|-------------------------------------|
| 412 | <p>pdcovidsympt_1_7_1</p> <p>Show the field ONLY if:<br/>[pdcovidsympt_1_7] = "1" OR<br/>[pdcovidsympt_1_7] = "2" OR<br/>[pdcovidsympt_1_7] = "4"</p>     | Details (Balance)                                                                                                                                | notes                                                                                                                                                                                                                                                                                                                                                                      |   |                 |   |                                                    |   |                                     |   |                                   |   |                                     |
| 413 | <p>pdcovidsympt_1_8_1</p> <p>Show the field ONLY if:<br/>[pdcovidsympt_1_8] = "1" OR<br/>[pdcovidsympt_1_8] = "2" OR<br/>[pdcovidsympt_1_8] = "4"</p>     | Details (Dyskinesias)                                                                                                                            | notes                                                                                                                                                                                                                                                                                                                                                                      |   |                 |   |                                                    |   |                                     |   |                                   |   |                                     |
| 414 | <p>pdcovidsympt_1_9_1</p> <p>Show the field ONLY if:<br/>[pdcovidsympt_1_9] = "1" OR<br/>[pdcovidsympt_1_9] = "2" OR<br/>[pdcovidsympt_1_9] = "4"</p>     | Details (Dystonia)                                                                                                                               | notes                                                                                                                                                                                                                                                                                                                                                                      |   |                 |   |                                                    |   |                                     |   |                                   |   |                                     |
| 415 | <p>pdcovidsympt_1_10_1</p> <p>Show the field ONLY if:<br/>[pdcovidsympt_1_10] = "1" OR<br/>[pdcovidsympt_1_10] = "2" OR<br/>[pdcovidsympt_1_10] = "4"</p> | Details (OFF time)                                                                                                                               | notes                                                                                                                                                                                                                                                                                                                                                                      |   |                 |   |                                                    |   |                                     |   |                                   |   |                                     |
| 416 | <p>updrs_1_1</p> <p>Show the field ONLY if:<br/>[covid_1] = "1" OR [covid_1] = "3"</p>                                                                    | <p>Section Header: <i>(Nonmotor) UPDRS Part I &amp; II (Has any of the following symptoms changed because of COVID?)</i></p> <p>1. Mentation</p> | <p>radio (Matrix)</p> <table border="1"> <tr><td>0</td><td>0=Never present</td></tr> <tr><td>1</td><td>1= Never present before COVID, present after COVID</td></tr> <tr><td>2</td><td>2=Present before COVID, Less severe</td></tr> <tr><td>3</td><td>3=Present before COVID, Unchanged</td></tr> <tr><td>4</td><td>4=Present before COVID, More severe</td></tr> </table> | 0 | 0=Never present | 1 | 1= Never present before COVID, present after COVID | 2 | 2=Present before COVID, Less severe | 3 | 3=Present before COVID, Unchanged | 4 | 4=Present before COVID, More severe |
| 0   | 0=Never present                                                                                                                                           |                                                                                                                                                  |                                                                                                                                                                                                                                                                                                                                                                            |   |                 |   |                                                    |   |                                     |   |                                   |   |                                     |
| 1   | 1= Never present before COVID, present after COVID                                                                                                        |                                                                                                                                                  |                                                                                                                                                                                                                                                                                                                                                                            |   |                 |   |                                                    |   |                                     |   |                                   |   |                                     |
| 2   | 2=Present before COVID, Less severe                                                                                                                       |                                                                                                                                                  |                                                                                                                                                                                                                                                                                                                                                                            |   |                 |   |                                                    |   |                                     |   |                                   |   |                                     |
| 3   | 3=Present before COVID, Unchanged                                                                                                                         |                                                                                                                                                  |                                                                                                                                                                                                                                                                                                                                                                            |   |                 |   |                                                    |   |                                     |   |                                   |   |                                     |
| 4   | 4=Present before COVID, More severe                                                                                                                       |                                                                                                                                                  |                                                                                                                                                                                                                                                                                                                                                                            |   |                 |   |                                                    |   |                                     |   |                                   |   |                                     |
| 417 | <p>updrs_1_2</p> <p>Show the field ONLY if:<br/>[covid_1] = "1" OR [covid_1] = "3"</p>                                                                    | 2. Thought Disorder                                                                                                                              | <p>radio (Matrix)</p> <table border="1"> <tr><td>0</td><td>0=Never present</td></tr> <tr><td>1</td><td>1= Never present before COVID, present after COVID</td></tr> <tr><td>2</td><td>2=Present before COVID, Less severe</td></tr> <tr><td>3</td><td>3=Present before COVID, Unchanged</td></tr> <tr><td>4</td><td>4=Present before COVID, More severe</td></tr> </table> | 0 | 0=Never present | 1 | 1= Never present before COVID, present after COVID | 2 | 2=Present before COVID, Less severe | 3 | 3=Present before COVID, Unchanged | 4 | 4=Present before COVID, More severe |
| 0   | 0=Never present                                                                                                                                           |                                                                                                                                                  |                                                                                                                                                                                                                                                                                                                                                                            |   |                 |   |                                                    |   |                                     |   |                                   |   |                                     |
| 1   | 1= Never present before COVID, present after COVID                                                                                                        |                                                                                                                                                  |                                                                                                                                                                                                                                                                                                                                                                            |   |                 |   |                                                    |   |                                     |   |                                   |   |                                     |
| 2   | 2=Present before COVID, Less severe                                                                                                                       |                                                                                                                                                  |                                                                                                                                                                                                                                                                                                                                                                            |   |                 |   |                                                    |   |                                     |   |                                   |   |                                     |
| 3   | 3=Present before COVID, Unchanged                                                                                                                         |                                                                                                                                                  |                                                                                                                                                                                                                                                                                                                                                                            |   |                 |   |                                                    |   |                                     |   |                                   |   |                                     |
| 4   | 4=Present before COVID, More severe                                                                                                                       |                                                                                                                                                  |                                                                                                                                                                                                                                                                                                                                                                            |   |                 |   |                                                    |   |                                     |   |                                   |   |                                     |
| 418 | <p>updrs_1_3</p> <p>Show the field ONLY if:<br/>[covid_1] = "1" OR [covid_1] = "3"</p>                                                                    | 3. Depression                                                                                                                                    | <p>radio (Matrix)</p> <table border="1"> <tr><td>0</td><td>0=Never present</td></tr> <tr><td>1</td><td>1= Never present before COVID, present after COVID</td></tr> <tr><td>2</td><td>2=Present before COVID, Less severe</td></tr> <tr><td>3</td><td>3=Present before COVID, Unchanged</td></tr> <tr><td>4</td><td>4=Present before COVID, More severe</td></tr> </table> | 0 | 0=Never present | 1 | 1= Never present before COVID, present after COVID | 2 | 2=Present before COVID, Less severe | 3 | 3=Present before COVID, Unchanged | 4 | 4=Present before COVID, More severe |
| 0   | 0=Never present                                                                                                                                           |                                                                                                                                                  |                                                                                                                                                                                                                                                                                                                                                                            |   |                 |   |                                                    |   |                                     |   |                                   |   |                                     |
| 1   | 1= Never present before COVID, present after COVID                                                                                                        |                                                                                                                                                  |                                                                                                                                                                                                                                                                                                                                                                            |   |                 |   |                                                    |   |                                     |   |                                   |   |                                     |
| 2   | 2=Present before COVID, Less severe                                                                                                                       |                                                                                                                                                  |                                                                                                                                                                                                                                                                                                                                                                            |   |                 |   |                                                    |   |                                     |   |                                   |   |                                     |
| 3   | 3=Present before COVID, Unchanged                                                                                                                         |                                                                                                                                                  |                                                                                                                                                                                                                                                                                                                                                                            |   |                 |   |                                                    |   |                                     |   |                                   |   |                                     |
| 4   | 4=Present before COVID, More severe                                                                                                                       |                                                                                                                                                  |                                                                                                                                                                                                                                                                                                                                                                            |   |                 |   |                                                    |   |                                     |   |                                   |   |                                     |
| 419 | <p>updrs_1_4</p> <p>Show the field ONLY if:<br/>[covid_1] = "1" OR [covid_1] = "3"</p>                                                                    | 4. Motivation/Initiative                                                                                                                         | <p>radio (Matrix)</p> <table border="1"> <tr><td>0</td><td>0=Never present</td></tr> <tr><td>1</td><td>1= Never present before COVID, present after COVID</td></tr> <tr><td>2</td><td>2=Present before COVID, Less severe</td></tr> <tr><td>3</td><td>3=Present before COVID, Unchanged</td></tr> <tr><td>4</td><td>4=Present before COVID, More severe</td></tr> </table> | 0 | 0=Never present | 1 | 1= Never present before COVID, present after COVID | 2 | 2=Present before COVID, Less severe | 3 | 3=Present before COVID, Unchanged | 4 | 4=Present before COVID, More severe |
| 0   | 0=Never present                                                                                                                                           |                                                                                                                                                  |                                                                                                                                                                                                                                                                                                                                                                            |   |                 |   |                                                    |   |                                     |   |                                   |   |                                     |
| 1   | 1= Never present before COVID, present after COVID                                                                                                        |                                                                                                                                                  |                                                                                                                                                                                                                                                                                                                                                                            |   |                 |   |                                                    |   |                                     |   |                                   |   |                                     |
| 2   | 2=Present before COVID, Less severe                                                                                                                       |                                                                                                                                                  |                                                                                                                                                                                                                                                                                                                                                                            |   |                 |   |                                                    |   |                                     |   |                                   |   |                                     |
| 3   | 3=Present before COVID, Unchanged                                                                                                                         |                                                                                                                                                  |                                                                                                                                                                                                                                                                                                                                                                            |   |                 |   |                                                    |   |                                     |   |                                   |   |                                     |
| 4   | 4=Present before COVID, More severe                                                                                                                       |                                                                                                                                                  |                                                                                                                                                                                                                                                                                                                                                                            |   |                 |   |                                                    |   |                                     |   |                                   |   |                                     |
| 420 | <p>updrs_1_5</p> <p>Show the field ONLY if:<br/>[covid_1] = "1" OR [covid_1] = "3"</p>                                                                    | 5. Speech                                                                                                                                        | <p>radio (Matrix)</p> <table border="1"> <tr><td>0</td><td>0=Never present</td></tr> <tr><td>1</td><td>1= Never present before COVID, present after COVID</td></tr> <tr><td>2</td><td>2=Present before COVID, Less severe</td></tr> <tr><td>3</td><td>3=Present before COVID, Unchanged</td></tr> <tr><td>4</td><td>4=Present before COVID, More severe</td></tr> </table> | 0 | 0=Never present | 1 | 1= Never present before COVID, present after COVID | 2 | 2=Present before COVID, Less severe | 3 | 3=Present before COVID, Unchanged | 4 | 4=Present before COVID, More severe |
| 0   | 0=Never present                                                                                                                                           |                                                                                                                                                  |                                                                                                                                                                                                                                                                                                                                                                            |   |                 |   |                                                    |   |                                     |   |                                   |   |                                     |
| 1   | 1= Never present before COVID, present after COVID                                                                                                        |                                                                                                                                                  |                                                                                                                                                                                                                                                                                                                                                                            |   |                 |   |                                                    |   |                                     |   |                                   |   |                                     |
| 2   | 2=Present before COVID, Less severe                                                                                                                       |                                                                                                                                                  |                                                                                                                                                                                                                                                                                                                                                                            |   |                 |   |                                                    |   |                                     |   |                                   |   |                                     |
| 3   | 3=Present before COVID, Unchanged                                                                                                                         |                                                                                                                                                  |                                                                                                                                                                                                                                                                                                                                                                            |   |                 |   |                                                    |   |                                     |   |                                   |   |                                     |
| 4   | 4=Present before COVID, More severe                                                                                                                       |                                                                                                                                                  |                                                                                                                                                                                                                                                                                                                                                                            |   |                 |   |                                                    |   |                                     |   |                                   |   |                                     |



|     |                                                                             |                    |                                                                                                                                                                                                                      |
|-----|-----------------------------------------------------------------------------|--------------------|----------------------------------------------------------------------------------------------------------------------------------------------------------------------------------------------------------------------|
| 421 | updrs_1_6<br>Show the field ONLY if:<br>[covid_1] = "1" OR [covid_1] = "3"  | 6. Salivation      | radio (Matrix)<br>0 0=Never present<br>1 1= Never present before COVID, present after COVID<br>2 2=Present before COVID, Less severe<br>3 3=Present before COVID, Unchanged<br>4 4=Present before COVID, More severe |
| 422 | updrs_1_7<br>Show the field ONLY if:<br>[covid_1] = "1" OR [covid_1] = "3"  | 7. Swallowing      | radio (Matrix)<br>0 0=Never present<br>1 1= Never present before COVID, present after COVID<br>2 2=Present before COVID, Less severe<br>3 3=Present before COVID, Unchanged<br>4 4=Present before COVID, More severe |
| 423 | updrs_1_8<br>Show the field ONLY if:<br>[covid_1] = "1" OR [covid_1] = "3"  | 8. Handwriting     | radio (Matrix)<br>0 0=Never present<br>1 1= Never present before COVID, present after COVID<br>2 2=Present before COVID, Less severe<br>3 3=Present before COVID, Unchanged<br>4 4=Present before COVID, More severe |
| 424 | updrs_1_9<br>Show the field ONLY if:<br>[covid_1] = "1" OR [covid_1] = "3"  | 9. Cutting food    | radio (Matrix)<br>0 0=Never present<br>1 1= Never present before COVID, present after COVID<br>2 2=Present before COVID, Less severe<br>3 3=Present before COVID, Unchanged<br>4 4=Present before COVID, More severe |
| 425 | updrs_1_10<br>Show the field ONLY if:<br>[covid_1] = "1" OR [covid_1] = "3" | 10. Dressing       | radio (Matrix)<br>0 0=Never present<br>1 1= Never present before COVID, present after COVID<br>2 2=Present before COVID, Less severe<br>3 3=Present before COVID, Unchanged<br>4 4=Present before COVID, More severe |
| 426 | updrs_1_11<br>Show the field ONLY if:<br>[covid_1] = "1" OR [covid_1] = "3" | 11. Hygiene        | radio (Matrix)<br>0 0=Never present<br>1 1= Never present before COVID, present after COVID<br>2 2=Present before COVID, Less severe<br>3 3=Present before COVID, Unchanged<br>4 4=Present before COVID, More severe |
| 427 | updrs_1_12<br>Show the field ONLY if:<br>[covid_1] = "1" OR [covid_1] = "3" | 12. Turning in bed | radio (Matrix)<br>0 0=Never present<br>1 1= Never present before COVID, present after COVID<br>2 2=Present before COVID, Less severe<br>3 3=Present before COVID, Unchanged<br>4 4=Present before COVID, More severe |

|     |                                                                                     |                                                                                                                    |                                                                                                                                                                                                                      |
|-----|-------------------------------------------------------------------------------------|--------------------------------------------------------------------------------------------------------------------|----------------------------------------------------------------------------------------------------------------------------------------------------------------------------------------------------------------------|
| 428 | updrs_1_13<br>Show the field ONLY if:<br>[covid_1] = "1" OR [covid_1] = "3"         | 13. Falling                                                                                                        | radio (Matrix)<br>0 0=Never present<br>1 1= Never present before COVID, present after COVID<br>2 2=Present before COVID, Less severe<br>3 3=Present before COVID, Unchanged<br>4 4=Present before COVID, More severe |
| 429 | updrs_1_14<br>Show the field ONLY if:<br>[covid_1] = "1" OR [covid_1] = "3"         | 14. Freezing                                                                                                       | radio (Matrix)<br>0 0=Never present<br>1 1= Never present before COVID, present after COVID<br>2 2=Present before COVID, Less severe<br>3 3=Present before COVID, Unchanged<br>4 4=Present before COVID, More severe |
| 430 | updrs_1_15<br>Show the field ONLY if:<br>[covid_1] = "1" OR [covid_1] = "3"         | 15. Walking                                                                                                        | radio (Matrix)<br>0 0=Never present<br>1 1= Never present before COVID, present after COVID<br>2 2=Present before COVID, Less severe<br>3 3=Present before COVID, Unchanged<br>4 4=Present before COVID, More severe |
| 431 | updrs_1_16<br>Show the field ONLY if:<br>[covid_1] = "1" OR [covid_1] = "3"         | 16. Tremor                                                                                                         | radio (Matrix)<br>0 0=Never present<br>1 1= Never present before COVID, present after COVID<br>2 2=Present before COVID, Less severe<br>3 3=Present before COVID, Unchanged<br>4 4=Present before COVID, More severe |
| 432 | updrs_1_17<br>Show the field ONLY if:<br>[covid_1] = "1" OR [covid_1] = "3"         | 17. Sensory symptoms                                                                                               | radio (Matrix)<br>0 0=Never present<br>1 1= Never present before COVID, present after COVID<br>2 2=Present before COVID, Less severe<br>3 3=Present before COVID, Unchanged<br>4 4=Present before COVID, More severe |
| 433 | pdnonmotorsymp_1_1<br>Show the field ONLY if:<br>[covid_1] = "1" OR [covid_1] = "3" | Section Header: (Non-motor symptom) Has any of the following symptoms changed because of COVID?<br>Sleep- Insomnia | radio (Matrix)<br>0 0=Never present<br>1 1= Never present before COVID, present after COVID<br>2 2=Present before COVID, Less severe<br>3 3=Present before COVID, Unchanged<br>4 4=Present before COVID, More severe |
| 434 | pdnonmotorsymp_1_2<br>Show the field ONLY if:<br>[covid_1] = "1" OR [covid_1] = "3" | Anxiety                                                                                                            | radio (Matrix)<br>0 0=Never present<br>1 1= Never present before COVID, present after COVID<br>2 2=Present before COVID, Less severe<br>3 3=Present before COVID, Unchanged<br>4 4=Present before COVID, More severe |

|     |                                                                                                                                                                                     |                                                         |                                                                                                                                                                                                                                                                                                                                                                            |   |                         |              |                                                    |                         |                                     |   |                                   |           |                                     |
|-----|-------------------------------------------------------------------------------------------------------------------------------------------------------------------------------------|---------------------------------------------------------|----------------------------------------------------------------------------------------------------------------------------------------------------------------------------------------------------------------------------------------------------------------------------------------------------------------------------------------------------------------------------|---|-------------------------|--------------|----------------------------------------------------|-------------------------|-------------------------------------|---|-----------------------------------|-----------|-------------------------------------|
| 435 | <p>pdnonmotorsymp_1_3</p> <p>Show the field ONLY if:<br/>[covid_1] = "1" OR [covid_1] = "3"</p>                                                                                     | Constipation                                            | <p>radio (Matrix)</p> <table border="1"> <tr><td>0</td><td>0=Never present</td></tr> <tr><td>1</td><td>1= Never present before COVID, present after COVID</td></tr> <tr><td>2</td><td>2=Present before COVID, Less severe</td></tr> <tr><td>3</td><td>3=Present before COVID, Unchanged</td></tr> <tr><td>4</td><td>4=Present before COVID, More severe</td></tr> </table> | 0 | 0=Never present         | 1            | 1= Never present before COVID, present after COVID | 2                       | 2=Present before COVID, Less severe | 3 | 3=Present before COVID, Unchanged | 4         | 4=Present before COVID, More severe |
| 0   | 0=Never present                                                                                                                                                                     |                                                         |                                                                                                                                                                                                                                                                                                                                                                            |   |                         |              |                                                    |                         |                                     |   |                                   |           |                                     |
| 1   | 1= Never present before COVID, present after COVID                                                                                                                                  |                                                         |                                                                                                                                                                                                                                                                                                                                                                            |   |                         |              |                                                    |                         |                                     |   |                                   |           |                                     |
| 2   | 2=Present before COVID, Less severe                                                                                                                                                 |                                                         |                                                                                                                                                                                                                                                                                                                                                                            |   |                         |              |                                                    |                         |                                     |   |                                   |           |                                     |
| 3   | 3=Present before COVID, Unchanged                                                                                                                                                   |                                                         |                                                                                                                                                                                                                                                                                                                                                                            |   |                         |              |                                                    |                         |                                     |   |                                   |           |                                     |
| 4   | 4=Present before COVID, More severe                                                                                                                                                 |                                                         |                                                                                                                                                                                                                                                                                                                                                                            |   |                         |              |                                                    |                         |                                     |   |                                   |           |                                     |
| 436 | <p>pdnonmotorsymp_1_4</p> <p>Show the field ONLY if:<br/>[covid_1] = "1" OR [covid_1] = "3"</p>                                                                                     | Pain                                                    | <p>radio (Matrix)</p> <table border="1"> <tr><td>0</td><td>0=Never present</td></tr> <tr><td>1</td><td>1= Never present before COVID, present after COVID</td></tr> <tr><td>2</td><td>2=Present before COVID, Less severe</td></tr> <tr><td>3</td><td>3=Present before COVID, Unchanged</td></tr> <tr><td>4</td><td>4=Present before COVID, More severe</td></tr> </table> | 0 | 0=Never present         | 1            | 1= Never present before COVID, present after COVID | 2                       | 2=Present before COVID, Less severe | 3 | 3=Present before COVID, Unchanged | 4         | 4=Present before COVID, More severe |
| 0   | 0=Never present                                                                                                                                                                     |                                                         |                                                                                                                                                                                                                                                                                                                                                                            |   |                         |              |                                                    |                         |                                     |   |                                   |           |                                     |
| 1   | 1= Never present before COVID, present after COVID                                                                                                                                  |                                                         |                                                                                                                                                                                                                                                                                                                                                                            |   |                         |              |                                                    |                         |                                     |   |                                   |           |                                     |
| 2   | 2=Present before COVID, Less severe                                                                                                                                                 |                                                         |                                                                                                                                                                                                                                                                                                                                                                            |   |                         |              |                                                    |                         |                                     |   |                                   |           |                                     |
| 3   | 3=Present before COVID, Unchanged                                                                                                                                                   |                                                         |                                                                                                                                                                                                                                                                                                                                                                            |   |                         |              |                                                    |                         |                                     |   |                                   |           |                                     |
| 4   | 4=Present before COVID, More severe                                                                                                                                                 |                                                         |                                                                                                                                                                                                                                                                                                                                                                            |   |                         |              |                                                    |                         |                                     |   |                                   |           |                                     |
| 437 | <p>pdnonmotorsymp_1_5</p> <p>Show the field ONLY if:<br/>[covid_1] = "1" OR [covid_1] = "3"</p>                                                                                     | Urinary issues                                          | <p>radio (Matrix)</p> <table border="1"> <tr><td>0</td><td>0=Never present</td></tr> <tr><td>1</td><td>1= Never present before COVID, present after COVID</td></tr> <tr><td>2</td><td>2=Present before COVID, Less severe</td></tr> <tr><td>3</td><td>3=Present before COVID, Unchanged</td></tr> <tr><td>4</td><td>4=Present before COVID, More severe</td></tr> </table> | 0 | 0=Never present         | 1            | 1= Never present before COVID, present after COVID | 2                       | 2=Present before COVID, Less severe | 3 | 3=Present before COVID, Unchanged | 4         | 4=Present before COVID, More severe |
| 0   | 0=Never present                                                                                                                                                                     |                                                         |                                                                                                                                                                                                                                                                                                                                                                            |   |                         |              |                                                    |                         |                                     |   |                                   |           |                                     |
| 1   | 1= Never present before COVID, present after COVID                                                                                                                                  |                                                         |                                                                                                                                                                                                                                                                                                                                                                            |   |                         |              |                                                    |                         |                                     |   |                                   |           |                                     |
| 2   | 2=Present before COVID, Less severe                                                                                                                                                 |                                                         |                                                                                                                                                                                                                                                                                                                                                                            |   |                         |              |                                                    |                         |                                     |   |                                   |           |                                     |
| 3   | 3=Present before COVID, Unchanged                                                                                                                                                   |                                                         |                                                                                                                                                                                                                                                                                                                                                                            |   |                         |              |                                                    |                         |                                     |   |                                   |           |                                     |
| 4   | 4=Present before COVID, More severe                                                                                                                                                 |                                                         |                                                                                                                                                                                                                                                                                                                                                                            |   |                         |              |                                                    |                         |                                     |   |                                   |           |                                     |
| 438 | <p>pdnonmotorsymp_1_5_1</p> <p>Show the field ONLY if:<br/>[pdnonmotorsymp_1_5] = "1" OR [pdnonmotorsymp_1_5] = "2" OR [pdnonmotorsymp_1_5] = "3" OR [pdnonmotorsymp_1_5] = "4"</p> | <p>Specify<br/>(Urinary issues)</p>                     | <p>checkbox</p> <table border="1"> <tr><td>1</td><td>pdnonmotorsymp_1_5_1__1</td><td>incontinence</td></tr> <tr><td>2</td><td>pdnonmotorsymp_1_5_1__2</td><td>urgency</td></tr> <tr><td>3</td><td>pdnonmotorsymp_1_5_1__3</td><td>frequency</td></tr> </table>                                                                                                             | 1 | pdnonmotorsymp_1_5_1__1 | incontinence | 2                                                  | pdnonmotorsymp_1_5_1__2 | urgency                             | 3 | pdnonmotorsymp_1_5_1__3           | frequency |                                     |
| 1   | pdnonmotorsymp_1_5_1__1                                                                                                                                                             | incontinence                                            |                                                                                                                                                                                                                                                                                                                                                                            |   |                         |              |                                                    |                         |                                     |   |                                   |           |                                     |
| 2   | pdnonmotorsymp_1_5_1__2                                                                                                                                                             | urgency                                                 |                                                                                                                                                                                                                                                                                                                                                                            |   |                         |              |                                                    |                         |                                     |   |                                   |           |                                     |
| 3   | pdnonmotorsymp_1_5_1__3                                                                                                                                                             | frequency                                               |                                                                                                                                                                                                                                                                                                                                                                            |   |                         |              |                                                    |                         |                                     |   |                                   |           |                                     |
| 439 | telephone_survey_complete                                                                                                                                                           | <p>Section Header: <i>Form Status</i><br/>Complete?</p> | <p>dropdown</p> <table border="1"> <tr><td>0</td><td>Incomplete</td></tr> <tr><td>1</td><td>Unverified</td></tr> <tr><td>2</td><td>Complete</td></tr> </table>                                                                                                                                                                                                             | 0 | Incomplete              | 1            | Unverified                                         | 2                       | Complete                            |   |                                   |           |                                     |
| 0   | Incomplete                                                                                                                                                                          |                                                         |                                                                                                                                                                                                                                                                                                                                                                            |   |                         |              |                                                    |                         |                                     |   |                                   |           |                                     |
| 1   | Unverified                                                                                                                                                                          |                                                         |                                                                                                                                                                                                                                                                                                                                                                            |   |                         |              |                                                    |                         |                                     |   |                                   |           |                                     |
| 2   | Complete                                                                                                                                                                            |                                                         |                                                                                                                                                                                                                                                                                                                                                                            |   |                         |              |                                                    |                         |                                     |   |                                   |           |                                     |

Survey Conort

CUMC/PF COVID Follow-up Survey (IRB-AAAT0369)

[Project Home](#)
[Project Setup](#)
[Online Designer](#)
[Data Dictionary](#)
[Codebook](#)

Data Dictionary Codebook

11/02/2020 4:09pm

[^ Collapse all instruments](#)

| #                                                                                                                                   | Variable / Field Name                | Field Label<br><i>Field Note</i>                                                                     | Field Attributes (Field Type, Validation, Choices, Calculations, etc.)                                                                                                                                                                                                                                                                                                                                                                                               |   |                                  |   |                                 |   |                        |   |                      |   |                                  |   |                        |   |                                      |   |                      |
|-------------------------------------------------------------------------------------------------------------------------------------|--------------------------------------|------------------------------------------------------------------------------------------------------|----------------------------------------------------------------------------------------------------------------------------------------------------------------------------------------------------------------------------------------------------------------------------------------------------------------------------------------------------------------------------------------------------------------------------------------------------------------------|---|----------------------------------|---|---------------------------------|---|------------------------|---|----------------------|---|----------------------------------|---|------------------------|---|--------------------------------------|---|----------------------|
| Instrument: <b>Follow-up Telephone Survey</b> (followup_telephone_survey) <span>Enabled as survey</span> <a href="#">^ Collapse</a> |                                      |                                                                                                      |                                                                                                                                                                                                                                                                                                                                                                                                                                                                      |   |                                  |   |                                 |   |                        |   |                      |   |                                  |   |                        |   |                                      |   |                      |
| 1                                                                                                                                   | record_id                            | Record ID                                                                                            | text                                                                                                                                                                                                                                                                                                                                                                                                                                                                 |   |                                  |   |                                 |   |                        |   |                      |   |                                  |   |                        |   |                                      |   |                      |
| 2                                                                                                                                   | subject_id                           | Subject ID                                                                                           | text, Required                                                                                                                                                                                                                                                                                                                                                                                                                                                       |   |                                  |   |                                 |   |                        |   |                      |   |                                  |   |                        |   |                                      |   |                      |
| 3                                                                                                                                   | demo_1                               | Section Header: I. Demographics<br>Year of Birth                                                     | text                                                                                                                                                                                                                                                                                                                                                                                                                                                                 |   |                                  |   |                                 |   |                        |   |                      |   |                                  |   |                        |   |                                      |   |                      |
| 4                                                                                                                                   | demo_2                               | Age                                                                                                  | text                                                                                                                                                                                                                                                                                                                                                                                                                                                                 |   |                                  |   |                                 |   |                        |   |                      |   |                                  |   |                        |   |                                      |   |                      |
| 5                                                                                                                                   | demo_3                               | Gender                                                                                               | radio<br><table border="1"> <tr><td>1</td><td>Male</td></tr> <tr><td>2</td><td>Female</td></tr> <tr><td>3</td><td>Other</td></tr> <tr><td>4</td><td>Prefer not to answer</td></tr> </table>                                                                                                                                                                                                                                                                          | 1 | Male                             | 2 | Female                          | 3 | Other                  | 4 | Prefer not to answer |   |                                  |   |                        |   |                                      |   |                      |
| 1                                                                                                                                   | Male                                 |                                                                                                      |                                                                                                                                                                                                                                                                                                                                                                                                                                                                      |   |                                  |   |                                 |   |                        |   |                      |   |                                  |   |                        |   |                                      |   |                      |
| 2                                                                                                                                   | Female                               |                                                                                                      |                                                                                                                                                                                                                                                                                                                                                                                                                                                                      |   |                                  |   |                                 |   |                        |   |                      |   |                                  |   |                        |   |                                      |   |                      |
| 3                                                                                                                                   | Other                                |                                                                                                      |                                                                                                                                                                                                                                                                                                                                                                                                                                                                      |   |                                  |   |                                 |   |                        |   |                      |   |                                  |   |                        |   |                                      |   |                      |
| 4                                                                                                                                   | Prefer not to answer                 |                                                                                                      |                                                                                                                                                                                                                                                                                                                                                                                                                                                                      |   |                                  |   |                                 |   |                        |   |                      |   |                                  |   |                        |   |                                      |   |                      |
| 6                                                                                                                                   | demo_4                               | Race/Ethnicity                                                                                       | radio<br><table border="1"> <tr><td>1</td><td>American Indian or Alaska Native</td></tr> <tr><td>2</td><td>Asian</td></tr> <tr><td>3</td><td>Black/African American</td></tr> <tr><td>4</td><td>Hispanic/Latino</td></tr> <tr><td>5</td><td>Native Hawaiian Pacific Islander</td></tr> <tr><td>6</td><td>White/Caucasian, Mixed</td></tr> <tr><td>7</td><td>Some other race, ethnicity or origin</td></tr> <tr><td>8</td><td>Prefer not to answer</td></tr> </table> | 1 | American Indian or Alaska Native | 2 | Asian                           | 3 | Black/African American | 4 | Hispanic/Latino      | 5 | Native Hawaiian Pacific Islander | 6 | White/Caucasian, Mixed | 7 | Some other race, ethnicity or origin | 8 | Prefer not to answer |
| 1                                                                                                                                   | American Indian or Alaska Native     |                                                                                                      |                                                                                                                                                                                                                                                                                                                                                                                                                                                                      |   |                                  |   |                                 |   |                        |   |                      |   |                                  |   |                        |   |                                      |   |                      |
| 2                                                                                                                                   | Asian                                |                                                                                                      |                                                                                                                                                                                                                                                                                                                                                                                                                                                                      |   |                                  |   |                                 |   |                        |   |                      |   |                                  |   |                        |   |                                      |   |                      |
| 3                                                                                                                                   | Black/African American               |                                                                                                      |                                                                                                                                                                                                                                                                                                                                                                                                                                                                      |   |                                  |   |                                 |   |                        |   |                      |   |                                  |   |                        |   |                                      |   |                      |
| 4                                                                                                                                   | Hispanic/Latino                      |                                                                                                      |                                                                                                                                                                                                                                                                                                                                                                                                                                                                      |   |                                  |   |                                 |   |                        |   |                      |   |                                  |   |                        |   |                                      |   |                      |
| 5                                                                                                                                   | Native Hawaiian Pacific Islander     |                                                                                                      |                                                                                                                                                                                                                                                                                                                                                                                                                                                                      |   |                                  |   |                                 |   |                        |   |                      |   |                                  |   |                        |   |                                      |   |                      |
| 6                                                                                                                                   | White/Caucasian, Mixed               |                                                                                                      |                                                                                                                                                                                                                                                                                                                                                                                                                                                                      |   |                                  |   |                                 |   |                        |   |                      |   |                                  |   |                        |   |                                      |   |                      |
| 7                                                                                                                                   | Some other race, ethnicity or origin |                                                                                                      |                                                                                                                                                                                                                                                                                                                                                                                                                                                                      |   |                                  |   |                                 |   |                        |   |                      |   |                                  |   |                        |   |                                      |   |                      |
| 8                                                                                                                                   | Prefer not to answer                 |                                                                                                      |                                                                                                                                                                                                                                                                                                                                                                                                                                                                      |   |                                  |   |                                 |   |                        |   |                      |   |                                  |   |                        |   |                                      |   |                      |
| 7                                                                                                                                   | demo_5                               | Marital Status                                                                                       | radio<br><table border="1"> <tr><td>1</td><td>Single [never married]</td></tr> <tr><td>2</td><td>Married or domestic partnership</td></tr> <tr><td>3</td><td>Separated</td></tr> <tr><td>4</td><td>Widowed</td></tr> <tr><td>5</td><td>Divorced</td></tr> </table>                                                                                                                                                                                                   | 1 | Single [never married]           | 2 | Married or domestic partnership | 3 | Separated              | 4 | Widowed              | 5 | Divorced                         |   |                        |   |                                      |   |                      |
| 1                                                                                                                                   | Single [never married]               |                                                                                                      |                                                                                                                                                                                                                                                                                                                                                                                                                                                                      |   |                                  |   |                                 |   |                        |   |                      |   |                                  |   |                        |   |                                      |   |                      |
| 2                                                                                                                                   | Married or domestic partnership      |                                                                                                      |                                                                                                                                                                                                                                                                                                                                                                                                                                                                      |   |                                  |   |                                 |   |                        |   |                      |   |                                  |   |                        |   |                                      |   |                      |
| 3                                                                                                                                   | Separated                            |                                                                                                      |                                                                                                                                                                                                                                                                                                                                                                                                                                                                      |   |                                  |   |                                 |   |                        |   |                      |   |                                  |   |                        |   |                                      |   |                      |
| 4                                                                                                                                   | Widowed                              |                                                                                                      |                                                                                                                                                                                                                                                                                                                                                                                                                                                                      |   |                                  |   |                                 |   |                        |   |                      |   |                                  |   |                        |   |                                      |   |                      |
| 5                                                                                                                                   | Divorced                             |                                                                                                      |                                                                                                                                                                                                                                                                                                                                                                                                                                                                      |   |                                  |   |                                 |   |                        |   |                      |   |                                  |   |                        |   |                                      |   |                      |
| 8                                                                                                                                   | demo_6                               | Zip Code                                                                                             | text (number)                                                                                                                                                                                                                                                                                                                                                                                                                                                        |   |                                  |   |                                 |   |                        |   |                      |   |                                  |   |                        |   |                                      |   |                      |
| 9                                                                                                                                   | demo_7                               | PD Status                                                                                            | radio, Required<br><table border="1"> <tr><td>1</td><td>Yes</td></tr> <tr><td>2</td><td>No</td></tr> </table>                                                                                                                                                                                                                                                                                                                                                        | 1 | Yes                              | 2 | No                              |   |                        |   |                      |   |                                  |   |                        |   |                                      |   |                      |
| 1                                                                                                                                   | Yes                                  |                                                                                                      |                                                                                                                                                                                                                                                                                                                                                                                                                                                                      |   |                                  |   |                                 |   |                        |   |                      |   |                                  |   |                        |   |                                      |   |                      |
| 2                                                                                                                                   | No                                   |                                                                                                      |                                                                                                                                                                                                                                                                                                                                                                                                                                                                      |   |                                  |   |                                 |   |                        |   |                      |   |                                  |   |                        |   |                                      |   |                      |
| 10                                                                                                                                  | demo_7_1                             | At what age did the motor symptoms begin?<br>Show the field ONLY if: [demo_7] = "1"                  | text (number)                                                                                                                                                                                                                                                                                                                                                                                                                                                        |   |                                  |   |                                 |   |                        |   |                      |   |                                  |   |                        |   |                                      |   |                      |
| 11                                                                                                                                  | demo_7_2                             | At what age was Parkinson's disease diagnosis?<br>Show the field ONLY if: [demo_7] = "1"             | text (number)                                                                                                                                                                                                                                                                                                                                                                                                                                                        |   |                                  |   |                                 |   |                        |   |                      |   |                                  |   |                        |   |                                      |   |                      |
| 12                                                                                                                                  | demo_7_3                             | What neurological disease/diagnosis does the patient have?<br>Show the field ONLY if: [demo_7] = "2" | text                                                                                                                                                                                                                                                                                                                                                                                                                                                                 |   |                                  |   |                                 |   |                        |   |                      |   |                                  |   |                        |   |                                      |   |                      |
| 13                                                                                                                                  | demo_7_4                             | At what age was that diagnosed?<br>Show the field ONLY if: [demo_7] = "2"                            | text (number)                                                                                                                                                                                                                                                                                                                                                                                                                                                        |   |                                  |   |                                 |   |                        |   |                      |   |                                  |   |                        |   |                                      |   |                      |

|    |                                                                                                       |                                                                                                                                                             |                                                                                                                                                                                                                                                                                                                                                                                                                                                                                                                                                                                                                                                          |   |                                                              |                                       |                                                                       |              |                                                 |   |                           |                                          |       |              |                                   |   |              |                                |   |              |                   |   |              |                                                              |
|----|-------------------------------------------------------------------------------------------------------|-------------------------------------------------------------------------------------------------------------------------------------------------------------|----------------------------------------------------------------------------------------------------------------------------------------------------------------------------------------------------------------------------------------------------------------------------------------------------------------------------------------------------------------------------------------------------------------------------------------------------------------------------------------------------------------------------------------------------------------------------------------------------------------------------------------------------------|---|--------------------------------------------------------------|---------------------------------------|-----------------------------------------------------------------------|--------------|-------------------------------------------------|---|---------------------------|------------------------------------------|-------|--------------|-----------------------------------|---|--------------|--------------------------------|---|--------------|-------------------|---|--------------|--------------------------------------------------------------|
| 14 | covid_1                                                                                               | Section Header: <i>II. COVID-19 Questions</i><br>Do you think you've been infected with coronavirus?                                                        | radio, Required<br><table border="1"> <tr><td>1</td><td>Yes</td></tr> <tr><td>2</td><td>No</td></tr> <tr><td>3</td><td>Unsure</td></tr> </table>                                                                                                                                                                                                                                                                                                                                                                                                                                                                                                         | 1 | Yes                                                          | 2                                     | No                                                                    | 3            | Unsure                                          |   |                           |                                          |       |              |                                   |   |              |                                |   |              |                   |   |              |                                                              |
| 1  | Yes                                                                                                   |                                                                                                                                                             |                                                                                                                                                                                                                                                                                                                                                                                                                                                                                                                                                                                                                                                          |   |                                                              |                                       |                                                                       |              |                                                 |   |                           |                                          |       |              |                                   |   |              |                                |   |              |                   |   |              |                                                              |
| 2  | No                                                                                                    |                                                                                                                                                             |                                                                                                                                                                                                                                                                                                                                                                                                                                                                                                                                                                                                                                                          |   |                                                              |                                       |                                                                       |              |                                                 |   |                           |                                          |       |              |                                   |   |              |                                |   |              |                   |   |              |                                                              |
| 3  | Unsure                                                                                                |                                                                                                                                                             |                                                                                                                                                                                                                                                                                                                                                                                                                                                                                                                                                                                                                                                          |   |                                                              |                                       |                                                                       |              |                                                 |   |                           |                                          |       |              |                                   |   |              |                                |   |              |                   |   |              |                                                              |
| 15 | covid_1_1<br>Show the field ONLY if:<br>[covid_1] = "1" or [covid_1] = "3"                            | When did you start having symptoms that you think were caused by the coronavirus?                                                                           | text (date_mdy)                                                                                                                                                                                                                                                                                                                                                                                                                                                                                                                                                                                                                                          |   |                                                              |                                       |                                                                       |              |                                                 |   |                           |                                          |       |              |                                   |   |              |                                |   |              |                   |   |              |                                                              |
| 16 | covid_1_2<br>Show the field ONLY if:<br>[covid_1] = "1" or [covid_1] = "3"                            | How long did those symptoms last (days)?                                                                                                                    | text (number)                                                                                                                                                                                                                                                                                                                                                                                                                                                                                                                                                                                                                                            |   |                                                              |                                       |                                                                       |              |                                                 |   |                           |                                          |       |              |                                   |   |              |                                |   |              |                   |   |              |                                                              |
| 17 | covid_1_3<br>Show the field ONLY if:<br>[covid_1] = "1" or [covid_1] = "3"                            | Have you been tested for the coronavirus? If so, what was the result?                                                                                       | radio<br><table border="1"> <tr><td>1</td><td>I have been tested and I tested positive (I had coronavirus)</td></tr> <tr><td>2</td><td>I have been tested and I tested negative (I did not have coronavirus)</td></tr> <tr><td>3</td><td>I have been tested and I do not know the result</td></tr> <tr><td>4</td><td>I have not been tested</td></tr> </table>                                                                                                                                                                                                                                                                                           | 1 | I have been tested and I tested positive (I had coronavirus) | 2                                     | I have been tested and I tested negative (I did not have coronavirus) | 3            | I have been tested and I do not know the result | 4 | I have not been tested    |                                          |       |              |                                   |   |              |                                |   |              |                   |   |              |                                                              |
| 1  | I have been tested and I tested positive (I had coronavirus)                                          |                                                                                                                                                             |                                                                                                                                                                                                                                                                                                                                                                                                                                                                                                                                                                                                                                                          |   |                                                              |                                       |                                                                       |              |                                                 |   |                           |                                          |       |              |                                   |   |              |                                |   |              |                   |   |              |                                                              |
| 2  | I have been tested and I tested negative (I did not have coronavirus)                                 |                                                                                                                                                             |                                                                                                                                                                                                                                                                                                                                                                                                                                                                                                                                                                                                                                                          |   |                                                              |                                       |                                                                       |              |                                                 |   |                           |                                          |       |              |                                   |   |              |                                |   |              |                   |   |              |                                                              |
| 3  | I have been tested and I do not know the result                                                       |                                                                                                                                                             |                                                                                                                                                                                                                                                                                                                                                                                                                                                                                                                                                                                                                                                          |   |                                                              |                                       |                                                                       |              |                                                 |   |                           |                                          |       |              |                                   |   |              |                                |   |              |                   |   |              |                                                              |
| 4  | I have not been tested                                                                                |                                                                                                                                                             |                                                                                                                                                                                                                                                                                                                                                                                                                                                                                                                                                                                                                                                          |   |                                                              |                                       |                                                                       |              |                                                 |   |                           |                                          |       |              |                                   |   |              |                                |   |              |                   |   |              |                                                              |
| 18 | covid_1_3_1<br>Show the field ONLY if:<br>[covid_1_3] = "1" OR [covid_1_3] = "2" OR [covid_1_3] = "3" | How were you tested?                                                                                                                                        | radio<br><table border="1"> <tr><td>1</td><td>Nose swab (PCR)</td></tr> <tr><td>2</td><td>Mouth swab (PCR)</td></tr> <tr><td>3</td><td>Blood test (serology)</td></tr> </table>                                                                                                                                                                                                                                                                                                                                                                                                                                                                          | 1 | Nose swab (PCR)                                              | 2                                     | Mouth swab (PCR)                                                      | 3            | Blood test (serology)                           |   |                           |                                          |       |              |                                   |   |              |                                |   |              |                   |   |              |                                                              |
| 1  | Nose swab (PCR)                                                                                       |                                                                                                                                                             |                                                                                                                                                                                                                                                                                                                                                                                                                                                                                                                                                                                                                                                          |   |                                                              |                                       |                                                                       |              |                                                 |   |                           |                                          |       |              |                                   |   |              |                                |   |              |                   |   |              |                                                              |
| 2  | Mouth swab (PCR)                                                                                      |                                                                                                                                                             |                                                                                                                                                                                                                                                                                                                                                                                                                                                                                                                                                                                                                                                          |   |                                                              |                                       |                                                                       |              |                                                 |   |                           |                                          |       |              |                                   |   |              |                                |   |              |                   |   |              |                                                              |
| 3  | Blood test (serology)                                                                                 |                                                                                                                                                             |                                                                                                                                                                                                                                                                                                                                                                                                                                                                                                                                                                                                                                                          |   |                                                              |                                       |                                                                       |              |                                                 |   |                           |                                          |       |              |                                   |   |              |                                |   |              |                   |   |              |                                                              |
| 19 | covid_1_4<br>Show the field ONLY if:<br>[covid_1] = "1" or [covid_1] = "3"                            | Whether or not you have had a coronavirus test, has a doctor or another healthcare professional diagnosed you as having or probably having the coronavirus? | radio<br><table border="1"> <tr><td>1</td><td>Yes</td></tr> <tr><td>2</td><td>No</td></tr> <tr><td>3</td><td>Unsure</td></tr> </table>                                                                                                                                                                                                                                                                                                                                                                                                                                                                                                                   | 1 | Yes                                                          | 2                                     | No                                                                    | 3            | Unsure                                          |   |                           |                                          |       |              |                                   |   |              |                                |   |              |                   |   |              |                                                              |
| 1  | Yes                                                                                                   |                                                                                                                                                             |                                                                                                                                                                                                                                                                                                                                                                                                                                                                                                                                                                                                                                                          |   |                                                              |                                       |                                                                       |              |                                                 |   |                           |                                          |       |              |                                   |   |              |                                |   |              |                   |   |              |                                                              |
| 2  | No                                                                                                    |                                                                                                                                                             |                                                                                                                                                                                                                                                                                                                                                                                                                                                                                                                                                                                                                                                          |   |                                                              |                                       |                                                                       |              |                                                 |   |                           |                                          |       |              |                                   |   |              |                                |   |              |                   |   |              |                                                              |
| 3  | Unsure                                                                                                |                                                                                                                                                             |                                                                                                                                                                                                                                                                                                                                                                                                                                                                                                                                                                                                                                                          |   |                                                              |                                       |                                                                       |              |                                                 |   |                           |                                          |       |              |                                   |   |              |                                |   |              |                   |   |              |                                                              |
| 20 | covid_1_5<br>Show the field ONLY if:<br>[covid_1] = "1" or [covid_1] = "3"                            | Have you contacted anyone, (other than the medical professionals that tested, or diagnosed, or treated you), to inform them you have coronavirus?           | radio<br><table border="1"> <tr><td>1</td><td>Yes</td></tr> <tr><td>2</td><td>No</td></tr> </table>                                                                                                                                                                                                                                                                                                                                                                                                                                                                                                                                                      | 1 | Yes                                                          | 2                                     | No                                                                    |              |                                                 |   |                           |                                          |       |              |                                   |   |              |                                |   |              |                   |   |              |                                                              |
| 1  | Yes                                                                                                   |                                                                                                                                                             |                                                                                                                                                                                                                                                                                                                                                                                                                                                                                                                                                                                                                                                          |   |                                                              |                                       |                                                                       |              |                                                 |   |                           |                                          |       |              |                                   |   |              |                                |   |              |                   |   |              |                                                              |
| 2  | No                                                                                                    |                                                                                                                                                             |                                                                                                                                                                                                                                                                                                                                                                                                                                                                                                                                                                                                                                                          |   |                                                              |                                       |                                                                       |              |                                                 |   |                           |                                          |       |              |                                   |   |              |                                |   |              |                   |   |              |                                                              |
| 21 | covid_1_6<br>Show the field ONLY if:<br>[covid_1] = "1" or [covid_1] = "3"                            | Who have you contacted to let them know that you think you have coronavirus? Please check all that apply.                                                   | checkbox<br><table border="1"> <tr><td>1</td><td>covid_1_6__1</td><td>A local health departments or hotline</td></tr> <tr><td>2</td><td>covid_1_6__2</td><td>Hospital or emergency room</td></tr> <tr><td>3</td><td>covid_1_6__3</td><td>My primary care doctor or another doctor</td></tr> <tr><td>4</td><td>covid_1_6__4</td><td>My employer, supervisor or school</td></tr> <tr><td>5</td><td>covid_1_6__5</td><td>Community or religious leaders</td></tr> <tr><td>6</td><td>covid_1_6__6</td><td>Family or friends</td></tr> <tr><td>7</td><td>covid_1_6__7</td><td>Online social contacts such as people on Facebook or Twitter</td></tr> </table> | 1 | covid_1_6__1                                                 | A local health departments or hotline | 2                                                                     | covid_1_6__2 | Hospital or emergency room                      | 3 | covid_1_6__3              | My primary care doctor or another doctor | 4     | covid_1_6__4 | My employer, supervisor or school | 5 | covid_1_6__5 | Community or religious leaders | 6 | covid_1_6__6 | Family or friends | 7 | covid_1_6__7 | Online social contacts such as people on Facebook or Twitter |
| 1  | covid_1_6__1                                                                                          | A local health departments or hotline                                                                                                                       |                                                                                                                                                                                                                                                                                                                                                                                                                                                                                                                                                                                                                                                          |   |                                                              |                                       |                                                                       |              |                                                 |   |                           |                                          |       |              |                                   |   |              |                                |   |              |                   |   |              |                                                              |
| 2  | covid_1_6__2                                                                                          | Hospital or emergency room                                                                                                                                  |                                                                                                                                                                                                                                                                                                                                                                                                                                                                                                                                                                                                                                                          |   |                                                              |                                       |                                                                       |              |                                                 |   |                           |                                          |       |              |                                   |   |              |                                |   |              |                   |   |              |                                                              |
| 3  | covid_1_6__3                                                                                          | My primary care doctor or another doctor                                                                                                                    |                                                                                                                                                                                                                                                                                                                                                                                                                                                                                                                                                                                                                                                          |   |                                                              |                                       |                                                                       |              |                                                 |   |                           |                                          |       |              |                                   |   |              |                                |   |              |                   |   |              |                                                              |
| 4  | covid_1_6__4                                                                                          | My employer, supervisor or school                                                                                                                           |                                                                                                                                                                                                                                                                                                                                                                                                                                                                                                                                                                                                                                                          |   |                                                              |                                       |                                                                       |              |                                                 |   |                           |                                          |       |              |                                   |   |              |                                |   |              |                   |   |              |                                                              |
| 5  | covid_1_6__5                                                                                          | Community or religious leaders                                                                                                                              |                                                                                                                                                                                                                                                                                                                                                                                                                                                                                                                                                                                                                                                          |   |                                                              |                                       |                                                                       |              |                                                 |   |                           |                                          |       |              |                                   |   |              |                                |   |              |                   |   |              |                                                              |
| 6  | covid_1_6__6                                                                                          | Family or friends                                                                                                                                           |                                                                                                                                                                                                                                                                                                                                                                                                                                                                                                                                                                                                                                                          |   |                                                              |                                       |                                                                       |              |                                                 |   |                           |                                          |       |              |                                   |   |              |                                |   |              |                   |   |              |                                                              |
| 7  | covid_1_6__7                                                                                          | Online social contacts such as people on Facebook or Twitter                                                                                                |                                                                                                                                                                                                                                                                                                                                                                                                                                                                                                                                                                                                                                                          |   |                                                              |                                       |                                                                       |              |                                                 |   |                           |                                          |       |              |                                   |   |              |                                |   |              |                   |   |              |                                                              |
| 22 | covid_1_7<br>Show the field ONLY if:<br>[covid_1] = "1" or [covid_1] = "3"                            | Whether or not you have been tested, or diagnosed, have you sought medical care for coronavirus?                                                            | yesno<br><table border="1"> <tr><td>1</td><td>Yes</td></tr> <tr><td>0</td><td>No</td></tr> </table>                                                                                                                                                                                                                                                                                                                                                                                                                                                                                                                                                      | 1 | Yes                                                          | 0                                     | No                                                                    |              |                                                 |   |                           |                                          |       |              |                                   |   |              |                                |   |              |                   |   |              |                                                              |
| 1  | Yes                                                                                                   |                                                                                                                                                             |                                                                                                                                                                                                                                                                                                                                                                                                                                                                                                                                                                                                                                                          |   |                                                              |                                       |                                                                       |              |                                                 |   |                           |                                          |       |              |                                   |   |              |                                |   |              |                   |   |              |                                                              |
| 0  | No                                                                                                    |                                                                                                                                                             |                                                                                                                                                                                                                                                                                                                                                                                                                                                                                                                                                                                                                                                          |   |                                                              |                                       |                                                                       |              |                                                 |   |                           |                                          |       |              |                                   |   |              |                                |   |              |                   |   |              |                                                              |
| 23 | covid_1_7_1<br>Show the field ONLY if:<br>[covid_1_7] = "1"                                           | Where did you first seek medical care for coronavirus?                                                                                                      | radio<br><table border="1"> <tr><td>1</td><td>Hospital or emergency room</td></tr> <tr><td>2</td><td>Urgent care</td></tr> <tr><td>3</td><td>My primary care doctor or another doctor</td></tr> <tr><td>4</td><td>A local health department</td></tr> <tr><td>5</td><td>Other</td></tr> </table>                                                                                                                                                                                                                                                                                                                                                         | 1 | Hospital or emergency room                                   | 2                                     | Urgent care                                                           | 3            | My primary care doctor or another doctor        | 4 | A local health department | 5                                        | Other |              |                                   |   |              |                                |   |              |                   |   |              |                                                              |
| 1  | Hospital or emergency room                                                                            |                                                                                                                                                             |                                                                                                                                                                                                                                                                                                                                                                                                                                                                                                                                                                                                                                                          |   |                                                              |                                       |                                                                       |              |                                                 |   |                           |                                          |       |              |                                   |   |              |                                |   |              |                   |   |              |                                                              |
| 2  | Urgent care                                                                                           |                                                                                                                                                             |                                                                                                                                                                                                                                                                                                                                                                                                                                                                                                                                                                                                                                                          |   |                                                              |                                       |                                                                       |              |                                                 |   |                           |                                          |       |              |                                   |   |              |                                |   |              |                   |   |              |                                                              |
| 3  | My primary care doctor or another doctor                                                              |                                                                                                                                                             |                                                                                                                                                                                                                                                                                                                                                                                                                                                                                                                                                                                                                                                          |   |                                                              |                                       |                                                                       |              |                                                 |   |                           |                                          |       |              |                                   |   |              |                                |   |              |                   |   |              |                                                              |
| 4  | A local health department                                                                             |                                                                                                                                                             |                                                                                                                                                                                                                                                                                                                                                                                                                                                                                                                                                                                                                                                          |   |                                                              |                                       |                                                                       |              |                                                 |   |                           |                                          |       |              |                                   |   |              |                                |   |              |                   |   |              |                                                              |
| 5  | Other                                                                                                 |                                                                                                                                                             |                                                                                                                                                                                                                                                                                                                                                                                                                                                                                                                                                                                                                                                          |   |                                                              |                                       |                                                                       |              |                                                 |   |                           |                                          |       |              |                                   |   |              |                                |   |              |                   |   |              |                                                              |

|    |                                                                     |                                                                                            |                                                                                                                                                                                                                                                                              |   |                |   |                          |   |                                                      |   |                                        |   |       |
|----|---------------------------------------------------------------------|--------------------------------------------------------------------------------------------|------------------------------------------------------------------------------------------------------------------------------------------------------------------------------------------------------------------------------------------------------------------------------|---|----------------|---|--------------------------|---|------------------------------------------------------|---|----------------------------------------|---|-------|
| 24 | covid_1_7_1_1<br>Show the field ONLY if:<br>[covid_1_7_1] = "5"     | Other: please specify                                                                      | text                                                                                                                                                                                                                                                                         |   |                |   |                          |   |                                                      |   |                                        |   |       |
| 25 | covid_1_8<br>Show the field ONLY if:<br>[covid_1_7] = "0"           | Why did you not seek care?                                                                 | radio<br><table border="1"> <tr><td>1</td><td>No insurance</td></tr> <tr><td>2</td><td>No access</td></tr> <tr><td>3</td><td>Did not think necessary</td></tr> <tr><td>4</td><td>Was advised not to seek care by family</td></tr> <tr><td>5</td><td>Other</td></tr> </table> | 1 | No insurance   | 2 | No access                | 3 | Did not think necessary                              | 4 | Was advised not to seek care by family | 5 | Other |
| 1  | No insurance                                                        |                                                                                            |                                                                                                                                                                                                                                                                              |   |                |   |                          |   |                                                      |   |                                        |   |       |
| 2  | No access                                                           |                                                                                            |                                                                                                                                                                                                                                                                              |   |                |   |                          |   |                                                      |   |                                        |   |       |
| 3  | Did not think necessary                                             |                                                                                            |                                                                                                                                                                                                                                                                              |   |                |   |                          |   |                                                      |   |                                        |   |       |
| 4  | Was advised not to seek care by family                              |                                                                                            |                                                                                                                                                                                                                                                                              |   |                |   |                          |   |                                                      |   |                                        |   |       |
| 5  | Other                                                               |                                                                                            |                                                                                                                                                                                                                                                                              |   |                |   |                          |   |                                                      |   |                                        |   |       |
| 26 | covid_1_8_1<br>Show the field ONLY if:<br>[covid_1_8] = "5"         | Other (Please specify _____)                                                               | text                                                                                                                                                                                                                                                                         |   |                |   |                          |   |                                                      |   |                                        |   |       |
| 27 | covid_1_7_1_2<br>Show the field ONLY if:<br>[covid_1_7_1] = "1"     | When you sought care from 'Hospital or Emergency Room', did you obtain care?               | radio<br><table border="1"> <tr><td>1</td><td>Yes, in person</td></tr> <tr><td>2</td><td>Yes, phone or video care</td></tr> <tr><td>3</td><td>Did not obtain care (follow up with a why? Question)</td></tr> </table>                                                        | 1 | Yes, in person | 2 | Yes, phone or video care | 3 | Did not obtain care (follow up with a why? Question) |   |                                        |   |       |
| 1  | Yes, in person                                                      |                                                                                            |                                                                                                                                                                                                                                                                              |   |                |   |                          |   |                                                      |   |                                        |   |       |
| 2  | Yes, phone or video care                                            |                                                                                            |                                                                                                                                                                                                                                                                              |   |                |   |                          |   |                                                      |   |                                        |   |       |
| 3  | Did not obtain care (follow up with a why? Question)                |                                                                                            |                                                                                                                                                                                                                                                                              |   |                |   |                          |   |                                                      |   |                                        |   |       |
| 28 | covid_1_7_1_2_1<br>Show the field ONLY if:<br>[covid_1_7_1_2] = "3" | Why?                                                                                       | text                                                                                                                                                                                                                                                                         |   |                |   |                          |   |                                                      |   |                                        |   |       |
| 29 | covid_1_7_1_3<br>Show the field ONLY if:<br>[covid_1_7_1] = "2"     | When you sought care from 'Urgent care', did you obtain care?                              | radio<br><table border="1"> <tr><td>1</td><td>Yes, in person</td></tr> <tr><td>2</td><td>Yes, phone or video care</td></tr> <tr><td>3</td><td>Did not obtain care (follow up with a why? Question)</td></tr> </table>                                                        | 1 | Yes, in person | 2 | Yes, phone or video care | 3 | Did not obtain care (follow up with a why? Question) |   |                                        |   |       |
| 1  | Yes, in person                                                      |                                                                                            |                                                                                                                                                                                                                                                                              |   |                |   |                          |   |                                                      |   |                                        |   |       |
| 2  | Yes, phone or video care                                            |                                                                                            |                                                                                                                                                                                                                                                                              |   |                |   |                          |   |                                                      |   |                                        |   |       |
| 3  | Did not obtain care (follow up with a why? Question)                |                                                                                            |                                                                                                                                                                                                                                                                              |   |                |   |                          |   |                                                      |   |                                        |   |       |
| 30 | covid_1_7_1_3_1<br>Show the field ONLY if:<br>[covid_1_7_1_3] = "3" | Why?                                                                                       | text                                                                                                                                                                                                                                                                         |   |                |   |                          |   |                                                      |   |                                        |   |       |
| 31 | covid_1_7_1_4<br>Show the field ONLY if:<br>[covid_1_7_1] = "3"     | When you sought care from 'My primary care doctor or another doctor', did you obtain care? | radio<br><table border="1"> <tr><td>1</td><td>Yes, in person</td></tr> <tr><td>2</td><td>Yes, phone or video care</td></tr> <tr><td>3</td><td>Did not obtain care (follow up with a why? Question)</td></tr> </table>                                                        | 1 | Yes, in person | 2 | Yes, phone or video care | 3 | Did not obtain care (follow up with a why? Question) |   |                                        |   |       |
| 1  | Yes, in person                                                      |                                                                                            |                                                                                                                                                                                                                                                                              |   |                |   |                          |   |                                                      |   |                                        |   |       |
| 2  | Yes, phone or video care                                            |                                                                                            |                                                                                                                                                                                                                                                                              |   |                |   |                          |   |                                                      |   |                                        |   |       |
| 3  | Did not obtain care (follow up with a why? Question)                |                                                                                            |                                                                                                                                                                                                                                                                              |   |                |   |                          |   |                                                      |   |                                        |   |       |
| 32 | covid_1_7_1_4_1<br>Show the field ONLY if:<br>[covid_1_7_1_4] = "3" | Why?                                                                                       | text                                                                                                                                                                                                                                                                         |   |                |   |                          |   |                                                      |   |                                        |   |       |
| 33 | covid_1_7_1_5<br>Show the field ONLY if:<br>[covid_1_7_1] = "4"     | When you sought care from 'A local health department', did you obtain care?                | radio<br><table border="1"> <tr><td>1</td><td>Yes, in person</td></tr> <tr><td>2</td><td>Yes, phone or video care</td></tr> <tr><td>3</td><td>Did not obtain care (follow up with a why? Question)</td></tr> </table>                                                        | 1 | Yes, in person | 2 | Yes, phone or video care | 3 | Did not obtain care (follow up with a why? Question) |   |                                        |   |       |
| 1  | Yes, in person                                                      |                                                                                            |                                                                                                                                                                                                                                                                              |   |                |   |                          |   |                                                      |   |                                        |   |       |
| 2  | Yes, phone or video care                                            |                                                                                            |                                                                                                                                                                                                                                                                              |   |                |   |                          |   |                                                      |   |                                        |   |       |
| 3  | Did not obtain care (follow up with a why? Question)                |                                                                                            |                                                                                                                                                                                                                                                                              |   |                |   |                          |   |                                                      |   |                                        |   |       |
| 34 | covid_1_7_1_5_1<br>Show the field ONLY if:<br>[covid_1_7_1_5] = "3" | Why?                                                                                       | text                                                                                                                                                                                                                                                                         |   |                |   |                          |   |                                                      |   |                                        |   |       |
| 35 | covid_1_7_1_6<br>Show the field ONLY if:<br>[covid_1_7_1] = "5"     | When you sought care from 'Other', did you obtain care?                                    | radio<br><table border="1"> <tr><td>1</td><td>Yes, in person</td></tr> <tr><td>2</td><td>Yes, phone or video care</td></tr> <tr><td>3</td><td>Did not obtain care (follow up with a why? Question)</td></tr> </table>                                                        | 1 | Yes, in person | 2 | Yes, phone or video care | 3 | Did not obtain care (follow up with a why? Question) |   |                                        |   |       |
| 1  | Yes, in person                                                      |                                                                                            |                                                                                                                                                                                                                                                                              |   |                |   |                          |   |                                                      |   |                                        |   |       |
| 2  | Yes, phone or video care                                            |                                                                                            |                                                                                                                                                                                                                                                                              |   |                |   |                          |   |                                                      |   |                                        |   |       |
| 3  | Did not obtain care (follow up with a why? Question)                |                                                                                            |                                                                                                                                                                                                                                                                              |   |                |   |                          |   |                                                      |   |                                        |   |       |
| 36 | covid_1_7_1_6_1<br>Show the field ONLY if:<br>[covid_1_7_1_6] = "3" | Why?                                                                                       | text                                                                                                                                                                                                                                                                         |   |                |   |                          |   |                                                      |   |                                        |   |       |

|    |                                                                                               |                                                                                                                                                          |                                                                                                     |
|----|-----------------------------------------------------------------------------------------------|----------------------------------------------------------------------------------------------------------------------------------------------------------|-----------------------------------------------------------------------------------------------------|
| 37 | covid_1_9<br>Show the field ONLY if:<br>[covid_1] = "1" or [covid_1] = "3"                    | Were you hospitalized for COVID?                                                                                                                         | radio<br>1 Not hospitalized<br>2 Hospitalized<br>3 Hospitalized and received Mechanical ventilation |
| 38 | covid_1_9_1<br>Show the field ONLY if:<br>[covid_1_9] = "2" OR [covid_1_9] = "3"              | Which hospital?                                                                                                                                          | text                                                                                                |
| 39 | covid_1_10<br>Show the field ONLY if:<br>[covid_1] = "1" or [covid_1] = "3"                   | How would you describe the severity of your COVID/COVID-like illness?                                                                                    | radio<br>1 Asymptomatic<br>2 Mild<br>3 Moderate<br>4 Severe                                         |
| 40 | sympt_1<br>Show the field ONLY if:<br>[covid_1] = "1" or [covid_1] = "3"                      | Section Header: (COVID symptoms) Have you experienced any of the following new symptoms during your COVID/ COVID-like illness? Common<br>Fever or chills | radio<br>0 0=no,<br>1 1=mild,<br>2 2=moderate<br>3 3=severe                                         |
| 41 | sympt_1_2<br>Show the field ONLY if:<br>[sympt_1] = "1" or [sympt_1] = "2" or [sympt_1] = "3" | Duration of Symptom (in days)<br>(Fever and chills)                                                                                                      | text (number)                                                                                       |
| 42 | sympt_1_3<br>Show the field ONLY if:<br>[sympt_1] = "1" or [sympt_1] = "2" or [sympt_1] = "3" | Details of the symptom (Can you describe the symptom in more detail?)<br>(Fever and chills)                                                              | notes                                                                                               |
| 43 | sympt_2<br>Show the field ONLY if:<br>[covid_1] = "1" OR [covid_1] = "3"                      | Body Temperature higher than 100.4 F or 38.0 C                                                                                                           | radio<br>0 Yes<br>1 No                                                                              |
| 44 | sympt_2_2<br>Show the field ONLY if:<br>[sympt_2] = "0"                                       | Duration of Symptom (in days)<br>(Body Temperature higher than 100.4 F or 38.0 C)                                                                        | text (number)                                                                                       |
| 45 | sympt_2_3<br>Show the field ONLY if:<br>[sympt_2] = "0"                                       | Details of the symptom (Can you describe the symptom in more detail?)<br><br>(Body Temperature higher than 100.4 F or 38.0 C)                            | notes                                                                                               |
| 46 | sympt_3<br>Show the field ONLY if:<br>[covid_1] = "1" OR [covid_1] = "3"                      | Fatigue or Tiredness                                                                                                                                     | radio<br>0 0=no,<br>1 1=mild<br>2 2=moderate<br>3 3=severe                                          |
| 47 | sympt_3_2<br>Show the field ONLY if:<br>[sympt_3] = "1" OR [sympt_3] = "2" OR [sympt_3] = "3" | Duration of Symptom (in days)<br>(Fatigue or Tiredness)                                                                                                  | text (number)                                                                                       |
| 48 | sympt_3_3<br>Show the field ONLY if:<br>[sympt_3] = "1" OR [sympt_3] = "2" OR [sympt_3] = "3" | Details of the symptom (Can you describe the symptom in more detail?)<br>(Fatigue or Tiredness)                                                          | notes                                                                                               |

|    |                                                                                                           |                                                                                                                   |                                                                                                                                                                                          |   |      |   |        |   |            |   |          |
|----|-----------------------------------------------------------------------------------------------------------|-------------------------------------------------------------------------------------------------------------------|------------------------------------------------------------------------------------------------------------------------------------------------------------------------------------------|---|------|---|--------|---|------------|---|----------|
| 49 | <p>sympt_4</p> <p>Show the field ONLY if:<br/>[covid_1] = "1" OR [covid_1] = "3"</p>                      | <p>Runny or stuffy nose</p>                                                                                       | <p>radio</p> <table border="1"> <tr><td>0</td><td>0=no</td></tr> <tr><td>1</td><td>1=mild</td></tr> <tr><td>2</td><td>2=moderate</td></tr> <tr><td>3</td><td>3=severe</td></tr> </table> | 0 | 0=no | 1 | 1=mild | 2 | 2=moderate | 3 | 3=severe |
| 0  | 0=no                                                                                                      |                                                                                                                   |                                                                                                                                                                                          |   |      |   |        |   |            |   |          |
| 1  | 1=mild                                                                                                    |                                                                                                                   |                                                                                                                                                                                          |   |      |   |        |   |            |   |          |
| 2  | 2=moderate                                                                                                |                                                                                                                   |                                                                                                                                                                                          |   |      |   |        |   |            |   |          |
| 3  | 3=severe                                                                                                  |                                                                                                                   |                                                                                                                                                                                          |   |      |   |        |   |            |   |          |
| 50 | <p>sympt_4_2</p> <p>Show the field ONLY if:<br/>[sympt_4] = "1" OR [sympt_4] = "2" OR [sympt_4] = "3"</p> | <p>Duration of Symptom<br/>(in days)</p> <p>(Runny or stuffy nose)</p>                                            | <p>text (number)</p>                                                                                                                                                                     |   |      |   |        |   |            |   |          |
| 51 | <p>sympt_4_3</p> <p>Show the field ONLY if:<br/>[sympt_4] = "1" OR [sympt_4] = "2" OR [sympt_4] = "3"</p> | <p>Details of the symptom<br/>(Can you describe the symptom in more detail?)</p> <p>(Runny or stuffy nose)</p>    | <p>notes</p>                                                                                                                                                                             |   |      |   |        |   |            |   |          |
| 52 | <p>sympt_5</p> <p>Show the field ONLY if:<br/>[covid_1] = "1" OR [covid_1] = "3"</p>                      | <p>Sneezing</p>                                                                                                   | <p>radio</p> <table border="1"> <tr><td>0</td><td>0=no</td></tr> <tr><td>1</td><td>1=mild</td></tr> <tr><td>2</td><td>2=moderate</td></tr> <tr><td>3</td><td>3=severe</td></tr> </table> | 0 | 0=no | 1 | 1=mild | 2 | 2=moderate | 3 | 3=severe |
| 0  | 0=no                                                                                                      |                                                                                                                   |                                                                                                                                                                                          |   |      |   |        |   |            |   |          |
| 1  | 1=mild                                                                                                    |                                                                                                                   |                                                                                                                                                                                          |   |      |   |        |   |            |   |          |
| 2  | 2=moderate                                                                                                |                                                                                                                   |                                                                                                                                                                                          |   |      |   |        |   |            |   |          |
| 3  | 3=severe                                                                                                  |                                                                                                                   |                                                                                                                                                                                          |   |      |   |        |   |            |   |          |
| 53 | <p>sympt_5_2</p> <p>Show the field ONLY if:<br/>[sympt_5] = "1" OR [sympt_5] = "2" OR [sympt_5] = "3"</p> | <p>Duration of Symptom<br/>(in days)</p> <p>(Sneezing)</p>                                                        | <p>text (number)</p>                                                                                                                                                                     |   |      |   |        |   |            |   |          |
| 54 | <p>sympt_5_3</p> <p>Show the field ONLY if:<br/>[sympt_5] = "1" OR [sympt_5] = "2" OR [sympt_5] = "3"</p> | <p>Details of the symptom<br/>(Can you describe the symptom in more detail?)</p> <p>(Sneezing)</p>                | <p>notes</p>                                                                                                                                                                             |   |      |   |        |   |            |   |          |
| 55 | <p>sympt_6</p> <p>Show the field ONLY if:<br/>[covid_1] = "1" OR [covid_1] = "3"</p>                      | <p>Temporary loss of smell</p>                                                                                    | <p>radio</p> <table border="1"> <tr><td>0</td><td>0=no</td></tr> <tr><td>1</td><td>1=mild</td></tr> <tr><td>2</td><td>2=moderate</td></tr> <tr><td>3</td><td>3=severe</td></tr> </table> | 0 | 0=no | 1 | 1=mild | 2 | 2=moderate | 3 | 3=severe |
| 0  | 0=no                                                                                                      |                                                                                                                   |                                                                                                                                                                                          |   |      |   |        |   |            |   |          |
| 1  | 1=mild                                                                                                    |                                                                                                                   |                                                                                                                                                                                          |   |      |   |        |   |            |   |          |
| 2  | 2=moderate                                                                                                |                                                                                                                   |                                                                                                                                                                                          |   |      |   |        |   |            |   |          |
| 3  | 3=severe                                                                                                  |                                                                                                                   |                                                                                                                                                                                          |   |      |   |        |   |            |   |          |
| 56 | <p>sympt_6_2</p> <p>Show the field ONLY if:<br/>[sympt_6] = "1" OR [sympt_6] = "2" OR [sympt_6] = "3"</p> | <p>Duration of Symptom<br/>(in days)</p> <p>(Temporary loss of smell)</p>                                         | <p>text (number)</p>                                                                                                                                                                     |   |      |   |        |   |            |   |          |
| 57 | <p>sympt_6_3</p> <p>Show the field ONLY if:<br/>[sympt_6] = "1" OR [sympt_6] = "2" OR [sympt_6] = "3"</p> | <p>Details of the symptom<br/>(Can you describe the symptom in more detail?)</p> <p>(Temporary loss of smell)</p> | <p>notes</p>                                                                                                                                                                             |   |      |   |        |   |            |   |          |
| 58 | <p>sympt_7</p> <p>Show the field ONLY if:<br/>[covid_1] = "1" OR [covid_1] = "3"</p>                      | <p>Sore throat</p>                                                                                                | <p>radio</p> <table border="1"> <tr><td>0</td><td>0=no</td></tr> <tr><td>1</td><td>1=mild</td></tr> <tr><td>2</td><td>2=moderate</td></tr> <tr><td>3</td><td>3=severe</td></tr> </table> | 0 | 0=no | 1 | 1=mild | 2 | 2=moderate | 3 | 3=severe |
| 0  | 0=no                                                                                                      |                                                                                                                   |                                                                                                                                                                                          |   |      |   |        |   |            |   |          |
| 1  | 1=mild                                                                                                    |                                                                                                                   |                                                                                                                                                                                          |   |      |   |        |   |            |   |          |
| 2  | 2=moderate                                                                                                |                                                                                                                   |                                                                                                                                                                                          |   |      |   |        |   |            |   |          |
| 3  | 3=severe                                                                                                  |                                                                                                                   |                                                                                                                                                                                          |   |      |   |        |   |            |   |          |
| 59 | <p>sympt_7_2</p> <p>Show the field ONLY if:<br/>[sympt_7] = "1" OR [sympt_7] = "2" OR [sympt_7] = "3"</p> | <p>Duration of Symptom<br/>(in days)</p> <p>(Sore throat)</p>                                                     | <p>text (number)</p>                                                                                                                                                                     |   |      |   |        |   |            |   |          |



|    |                                                                                                               |                                                                                                               |                                                                                                                                                                                          |   |      |   |        |   |            |   |          |
|----|---------------------------------------------------------------------------------------------------------------|---------------------------------------------------------------------------------------------------------------|------------------------------------------------------------------------------------------------------------------------------------------------------------------------------------------|---|------|---|--------|---|------------|---|----------|
| 60 | <p>sympt_7_3</p> <p>Show the field ONLY if:<br/>[sympt_7] = "1" OR [sympt_7] = "2" OR [sympt_7] = "3"</p>     | <p>Details of the symptom<br/>(Can you describe the symptom in more detail?)</p> <p>(Sore throat)</p>         | <p>notes</p>                                                                                                                                                                             |   |      |   |        |   |            |   |          |
| 61 | <p>sympt_8</p> <p>Show the field ONLY if:<br/>[covid_1] = "1" OR [covid_1] = "3"</p>                          | <p>Cough</p>                                                                                                  | <p>radio</p> <table border="1"> <tr><td>0</td><td>0=no</td></tr> <tr><td>1</td><td>1=mild</td></tr> <tr><td>2</td><td>2=moderate</td></tr> <tr><td>3</td><td>3=severe</td></tr> </table> | 0 | 0=no | 1 | 1=mild | 2 | 2=moderate | 3 | 3=severe |
| 0  | 0=no                                                                                                          |                                                                                                               |                                                                                                                                                                                          |   |      |   |        |   |            |   |          |
| 1  | 1=mild                                                                                                        |                                                                                                               |                                                                                                                                                                                          |   |      |   |        |   |            |   |          |
| 2  | 2=moderate                                                                                                    |                                                                                                               |                                                                                                                                                                                          |   |      |   |        |   |            |   |          |
| 3  | 3=severe                                                                                                      |                                                                                                               |                                                                                                                                                                                          |   |      |   |        |   |            |   |          |
| 62 | <p>sympt_8_2</p> <p>Show the field ONLY if:<br/>[sympt_8] = "1" OR [sympt_8] = "2" OR [sympt_8] = "3"</p>     | <p>Duration of Symptom<br/>(in days)</p> <p>(Cough)</p>                                                       | <p>text (number)</p>                                                                                                                                                                     |   |      |   |        |   |            |   |          |
| 63 | <p>sympt_8_3</p> <p>Show the field ONLY if:<br/>[sympt_8] = "1" OR [sympt_8] = "2" OR [sympt_8] = "3"</p>     | <p>Details of the symptom<br/>(Can you describe the symptom in more detail?)</p> <p>(Cough)</p>               | <p>notes</p>                                                                                                                                                                             |   |      |   |        |   |            |   |          |
| 64 | <p>sympt_9</p> <p>Show the field ONLY if:<br/>[covid_1] = "1" OR [covid_1] = "3"</p>                          | <p>Shortness of breath</p>                                                                                    | <p>radio</p> <table border="1"> <tr><td>0</td><td>0=no</td></tr> <tr><td>1</td><td>1=mild</td></tr> <tr><td>2</td><td>2=moderate</td></tr> <tr><td>3</td><td>3=severe</td></tr> </table> | 0 | 0=no | 1 | 1=mild | 2 | 2=moderate | 3 | 3=severe |
| 0  | 0=no                                                                                                          |                                                                                                               |                                                                                                                                                                                          |   |      |   |        |   |            |   |          |
| 1  | 1=mild                                                                                                        |                                                                                                               |                                                                                                                                                                                          |   |      |   |        |   |            |   |          |
| 2  | 2=moderate                                                                                                    |                                                                                                               |                                                                                                                                                                                          |   |      |   |        |   |            |   |          |
| 3  | 3=severe                                                                                                      |                                                                                                               |                                                                                                                                                                                          |   |      |   |        |   |            |   |          |
| 65 | <p>sympt_9_2</p> <p>Show the field ONLY if:<br/>[sympt_9] = "1" OR [sympt_9] = "2" OR [sympt_9] = "3"</p>     | <p>Duration of Symptom<br/>(in days)</p> <p>(Shortness of breath)</p>                                         | <p>text (number)</p>                                                                                                                                                                     |   |      |   |        |   |            |   |          |
| 66 | <p>sympt_9_3</p> <p>Show the field ONLY if:<br/>[sympt_9] = "1" OR [sympt_9] = "2" OR [sympt_9] = "3"</p>     | <p>Details of the symptom<br/>(Can you describe the symptom in more detail?)</p> <p>(Shortness of breath)</p> | <p>notes</p>                                                                                                                                                                             |   |      |   |        |   |            |   |          |
| 67 | <p>sympt_10</p> <p>Show the field ONLY if:<br/>[covid_1] = "1" OR [covid_1] = "3"</p>                         | <p>Chest congestion</p>                                                                                       | <p>radio</p> <table border="1"> <tr><td>0</td><td>0=no</td></tr> <tr><td>1</td><td>1=mild</td></tr> <tr><td>2</td><td>2=moderate</td></tr> <tr><td>3</td><td>3=severe</td></tr> </table> | 0 | 0=no | 1 | 1=mild | 2 | 2=moderate | 3 | 3=severe |
| 0  | 0=no                                                                                                          |                                                                                                               |                                                                                                                                                                                          |   |      |   |        |   |            |   |          |
| 1  | 1=mild                                                                                                        |                                                                                                               |                                                                                                                                                                                          |   |      |   |        |   |            |   |          |
| 2  | 2=moderate                                                                                                    |                                                                                                               |                                                                                                                                                                                          |   |      |   |        |   |            |   |          |
| 3  | 3=severe                                                                                                      |                                                                                                               |                                                                                                                                                                                          |   |      |   |        |   |            |   |          |
| 68 | <p>sympt_10_2</p> <p>Show the field ONLY if:<br/>[sympt_10] = "1" OR [sympt_10] = "2" OR [sympt_10] = "3"</p> | <p>Duration of Symptom<br/>(in days)</p> <p>(Chest congestion)</p>                                            | <p>text (number)</p>                                                                                                                                                                     |   |      |   |        |   |            |   |          |
| 69 | <p>sympt_10_3</p> <p>Show the field ONLY if:<br/>[sympt_10] = "1" OR [sympt_10] = "2" OR [sympt_10] = "3"</p> | <p>Details of the symptom<br/>(Can you describe the symptom in more detail?)</p> <p>(Chest congestion)</p>    | <p>notes</p>                                                                                                                                                                             |   |      |   |        |   |            |   |          |

|    |                                                                                                               |                                                                                                                   |                                                                                                                                                                                          |   |      |   |        |   |            |   |          |
|----|---------------------------------------------------------------------------------------------------------------|-------------------------------------------------------------------------------------------------------------------|------------------------------------------------------------------------------------------------------------------------------------------------------------------------------------------|---|------|---|--------|---|------------|---|----------|
| 70 | <p>sympt_11</p> <p>Show the field ONLY if:<br/>[covid_1] = "1" OR [covid_1] = "3"</p>                         | <p>Temporary loss of taste</p>                                                                                    | <p>radio</p> <table border="1"> <tr><td>0</td><td>0=no</td></tr> <tr><td>1</td><td>1=mild</td></tr> <tr><td>2</td><td>2=moderate</td></tr> <tr><td>3</td><td>3=severe</td></tr> </table> | 0 | 0=no | 1 | 1=mild | 2 | 2=moderate | 3 | 3=severe |
| 0  | 0=no                                                                                                          |                                                                                                                   |                                                                                                                                                                                          |   |      |   |        |   |            |   |          |
| 1  | 1=mild                                                                                                        |                                                                                                                   |                                                                                                                                                                                          |   |      |   |        |   |            |   |          |
| 2  | 2=moderate                                                                                                    |                                                                                                                   |                                                                                                                                                                                          |   |      |   |        |   |            |   |          |
| 3  | 3=severe                                                                                                      |                                                                                                                   |                                                                                                                                                                                          |   |      |   |        |   |            |   |          |
| 71 | <p>sympt_11_2</p> <p>Show the field ONLY if:<br/>[sympt_11] = "1" OR [sympt_11] = "2" OR [sympt_11] = "3"</p> | <p>Duration of Symptom<br/>(in days)</p> <p>(Temporary loss of taste)</p>                                         | <p>text (number)</p>                                                                                                                                                                     |   |      |   |        |   |            |   |          |
| 72 | <p>sympt_11_3</p> <p>Show the field ONLY if:<br/>[sympt_11] = "1" OR [sympt_11] = "2" OR [sympt_11] = "3"</p> | <p>Details of the symptom<br/>(Can you describe the symptom in more detail?)</p> <p>(Temporary loss of taste)</p> | <p>notes</p>                                                                                                                                                                             |   |      |   |        |   |            |   |          |
| 73 | <p>sympt_12</p> <p>Show the field ONLY if:<br/>[covid_1] = "1" OR [covid_1] = "3"</p>                         | <p>Nausea</p>                                                                                                     | <p>radio</p> <table border="1"> <tr><td>0</td><td>0=no</td></tr> <tr><td>1</td><td>1=mild</td></tr> <tr><td>2</td><td>2=moderate</td></tr> <tr><td>3</td><td>3=severe</td></tr> </table> | 0 | 0=no | 1 | 1=mild | 2 | 2=moderate | 3 | 3=severe |
| 0  | 0=no                                                                                                          |                                                                                                                   |                                                                                                                                                                                          |   |      |   |        |   |            |   |          |
| 1  | 1=mild                                                                                                        |                                                                                                                   |                                                                                                                                                                                          |   |      |   |        |   |            |   |          |
| 2  | 2=moderate                                                                                                    |                                                                                                                   |                                                                                                                                                                                          |   |      |   |        |   |            |   |          |
| 3  | 3=severe                                                                                                      |                                                                                                                   |                                                                                                                                                                                          |   |      |   |        |   |            |   |          |
| 74 | <p>sympt_12_2</p> <p>Show the field ONLY if:<br/>[sympt_12] = "1" OR [sympt_12] = "2" OR [sympt_12] = "3"</p> | <p>Duration of Symptom<br/>(in days)</p> <p>(Nausea)</p>                                                          | <p>text (number)</p>                                                                                                                                                                     |   |      |   |        |   |            |   |          |
| 75 | <p>sympt_12_3</p> <p>Show the field ONLY if:<br/>[sympt_12] = "1" OR [sympt_12] = "2" OR [sympt_12] = "3"</p> | <p>Details of the symptom<br/>(Can you describe the symptom in more detail?)</p> <p>(Nausea)</p>                  | <p>notes</p>                                                                                                                                                                             |   |      |   |        |   |            |   |          |
| 76 | <p>sympt_13</p> <p>Show the field ONLY if:<br/>[covid_1] = "1" OR [covid_1] = "3"</p>                         | <p>Vomiting</p>                                                                                                   | <p>radio</p> <table border="1"> <tr><td>0</td><td>0=no</td></tr> <tr><td>1</td><td>1=mild</td></tr> <tr><td>2</td><td>2=moderate</td></tr> <tr><td>3</td><td>3=severe</td></tr> </table> | 0 | 0=no | 1 | 1=mild | 2 | 2=moderate | 3 | 3=severe |
| 0  | 0=no                                                                                                          |                                                                                                                   |                                                                                                                                                                                          |   |      |   |        |   |            |   |          |
| 1  | 1=mild                                                                                                        |                                                                                                                   |                                                                                                                                                                                          |   |      |   |        |   |            |   |          |
| 2  | 2=moderate                                                                                                    |                                                                                                                   |                                                                                                                                                                                          |   |      |   |        |   |            |   |          |
| 3  | 3=severe                                                                                                      |                                                                                                                   |                                                                                                                                                                                          |   |      |   |        |   |            |   |          |
| 77 | <p>sympt_13_2</p> <p>Show the field ONLY if:<br/>[sympt_13] = "1" OR [sympt_13] = "2" OR [sympt_13] = "3"</p> | <p>Duration of Symptom<br/>(in days)</p> <p>(Vomiting)</p>                                                        | <p>text (number)</p>                                                                                                                                                                     |   |      |   |        |   |            |   |          |
| 78 | <p>sympt_13_3</p> <p>Show the field ONLY if:<br/>[sympt_13] = "1" OR [sympt_13] = "2" OR [sympt_13] = "3"</p> | <p>Details of the symptom<br/>(Can you describe the symptom in more detail?)</p> <p>(Vomiting)</p>                | <p>notes</p>                                                                                                                                                                             |   |      |   |        |   |            |   |          |
| 79 | <p>sympt_14</p> <p>Show the field ONLY if:<br/>[covid_1] = "1" OR [covid_1] = "3"</p>                         | <p>Diarrhea</p>                                                                                                   | <p>radio</p> <table border="1"> <tr><td>0</td><td>0=no</td></tr> <tr><td>1</td><td>1=mild</td></tr> <tr><td>2</td><td>2=moderate</td></tr> <tr><td>3</td><td>3=severe</td></tr> </table> | 0 | 0=no | 1 | 1=mild | 2 | 2=moderate | 3 | 3=severe |
| 0  | 0=no                                                                                                          |                                                                                                                   |                                                                                                                                                                                          |   |      |   |        |   |            |   |          |
| 1  | 1=mild                                                                                                        |                                                                                                                   |                                                                                                                                                                                          |   |      |   |        |   |            |   |          |
| 2  | 2=moderate                                                                                                    |                                                                                                                   |                                                                                                                                                                                          |   |      |   |        |   |            |   |          |
| 3  | 3=severe                                                                                                      |                                                                                                                   |                                                                                                                                                                                          |   |      |   |        |   |            |   |          |
| 80 | <p>sympt_14_2</p> <p>Show the field ONLY if:<br/>[sympt_14] = "1" OR [sympt_14] = "2" OR [sympt_14] = "3"</p> | <p>Duration of Symptom<br/>(in days)</p> <p>(Diarrhea)</p>                                                        | <p>text (number)</p>                                                                                                                                                                     |   |      |   |        |   |            |   |          |

|    |                                                                                                               |                                                                                                                    |                                                                                                                                                                                          |   |      |   |        |   |            |   |          |
|----|---------------------------------------------------------------------------------------------------------------|--------------------------------------------------------------------------------------------------------------------|------------------------------------------------------------------------------------------------------------------------------------------------------------------------------------------|---|------|---|--------|---|------------|---|----------|
| 81 | <p>sympt_14_3</p> <p>Show the field ONLY if:<br/>[sympt_14] = "1" OR [sympt_14] = "2" OR [sympt_14] = "3"</p> | <p>Details of the symptom<br/>(Can you describe the symptom in more detail?)</p> <p>(Diarrhea)</p>                 | notes                                                                                                                                                                                    |   |      |   |        |   |            |   |          |
| 82 | <p>sympt_15</p> <p>Show the field ONLY if:<br/>[covid_1] = "1" OR [covid_1] = "3"</p>                         | Abdominal discomfort                                                                                               | <p>radio</p> <table border="1"> <tr><td>0</td><td>0=no</td></tr> <tr><td>1</td><td>1=mild</td></tr> <tr><td>2</td><td>2=moderate</td></tr> <tr><td>3</td><td>3=severe</td></tr> </table> | 0 | 0=no | 1 | 1=mild | 2 | 2=moderate | 3 | 3=severe |
| 0  | 0=no                                                                                                          |                                                                                                                    |                                                                                                                                                                                          |   |      |   |        |   |            |   |          |
| 1  | 1=mild                                                                                                        |                                                                                                                    |                                                                                                                                                                                          |   |      |   |        |   |            |   |          |
| 2  | 2=moderate                                                                                                    |                                                                                                                    |                                                                                                                                                                                          |   |      |   |        |   |            |   |          |
| 3  | 3=severe                                                                                                      |                                                                                                                    |                                                                                                                                                                                          |   |      |   |        |   |            |   |          |
| 83 | <p>sympt_15_2</p> <p>Show the field ONLY if:<br/>[sympt_15] = "1" OR [sympt_15] = "2" OR [sympt_15] = "3"</p> | <p>Duration of Symptom<br/>(in days)</p> <p>(Abdominal discomfort)</p>                                             | text (number)                                                                                                                                                                            |   |      |   |        |   |            |   |          |
| 84 | <p>sympt_15_3</p> <p>Show the field ONLY if:<br/>[sympt_15] = "1" OR [sympt_15] = "2" OR [sympt_15] = "3"</p> | <p>Details of the symptom<br/>(Can you describe the symptom in more detail?)</p> <p>(Abdominal discomfort)</p>     | notes                                                                                                                                                                                    |   |      |   |        |   |            |   |          |
| 85 | <p>sympt_16</p> <p>Show the field ONLY if:<br/>[covid_1] = "1" OR [covid_1] = "3"</p>                         | Muscle or body ache/pain                                                                                           | <p>radio</p> <table border="1"> <tr><td>0</td><td>0=no</td></tr> <tr><td>1</td><td>1=mild</td></tr> <tr><td>2</td><td>2=moderate</td></tr> <tr><td>3</td><td>3=severe</td></tr> </table> | 0 | 0=no | 1 | 1=mild | 2 | 2=moderate | 3 | 3=severe |
| 0  | 0=no                                                                                                          |                                                                                                                    |                                                                                                                                                                                          |   |      |   |        |   |            |   |          |
| 1  | 1=mild                                                                                                        |                                                                                                                    |                                                                                                                                                                                          |   |      |   |        |   |            |   |          |
| 2  | 2=moderate                                                                                                    |                                                                                                                    |                                                                                                                                                                                          |   |      |   |        |   |            |   |          |
| 3  | 3=severe                                                                                                      |                                                                                                                    |                                                                                                                                                                                          |   |      |   |        |   |            |   |          |
| 86 | <p>sympt_16_2</p> <p>Show the field ONLY if:<br/>[sympt_16] = "1" OR [sympt_16] = "2" OR [sympt_16] = "3"</p> | <p>Duration of Symptom<br/>(in days)</p> <p>(Muscle or body ache/pain)</p>                                         | text (number)                                                                                                                                                                            |   |      |   |        |   |            |   |          |
| 87 | <p>sympt_16_3</p> <p>Show the field ONLY if:<br/>[sympt_16] = "1" OR [sympt_16] = "2" OR [sympt_16] = "3"</p> | <p>Details of the symptom<br/>(Can you describe the symptom in more detail?)</p> <p>(Muscle or body ache/pain)</p> | notes                                                                                                                                                                                    |   |      |   |        |   |            |   |          |
| 88 | <p>sympt_17</p> <p>Show the field ONLY if:<br/>[covid_1] = "1" OR [covid_1] = "3"</p>                         | Dry skin                                                                                                           | <p>radio</p> <table border="1"> <tr><td>0</td><td>0=no</td></tr> <tr><td>1</td><td>1=mild</td></tr> <tr><td>2</td><td>2=moderate</td></tr> <tr><td>3</td><td>3=severe</td></tr> </table> | 0 | 0=no | 1 | 1=mild | 2 | 2=moderate | 3 | 3=severe |
| 0  | 0=no                                                                                                          |                                                                                                                    |                                                                                                                                                                                          |   |      |   |        |   |            |   |          |
| 1  | 1=mild                                                                                                        |                                                                                                                    |                                                                                                                                                                                          |   |      |   |        |   |            |   |          |
| 2  | 2=moderate                                                                                                    |                                                                                                                    |                                                                                                                                                                                          |   |      |   |        |   |            |   |          |
| 3  | 3=severe                                                                                                      |                                                                                                                    |                                                                                                                                                                                          |   |      |   |        |   |            |   |          |
| 89 | <p>sympt_17_2</p> <p>Show the field ONLY if:<br/>[sympt_17] = "1" OR [sympt_17] = "2" OR [sympt_17] = "3"</p> | <p>Duration of Symptom<br/>(in days)</p> <p>(Dry skin)</p>                                                         | text (number)                                                                                                                                                                            |   |      |   |        |   |            |   |          |
| 90 | <p>sympt_17_3</p> <p>Show the field ONLY if:<br/>[sympt_17] = "1" OR [sympt_17] = "2" OR [sympt_17] = "3"</p> | <p>Details of the symptom<br/>(Can you describe the symptom in more detail?)</p> <p>(Dry skin)</p>                 | notes                                                                                                                                                                                    |   |      |   |        |   |            |   |          |
| 91 | <p>sympt_18</p> <p>Show the field ONLY if:<br/>[covid_1] = "1" OR [covid_1] = "3"</p>                         | Skin rash                                                                                                          | <p>radio</p> <table border="1"> <tr><td>0</td><td>0=no</td></tr> <tr><td>1</td><td>1=mild</td></tr> <tr><td>2</td><td>2=moderate</td></tr> <tr><td>3</td><td>3=severe</td></tr> </table> | 0 | 0=no | 1 | 1=mild | 2 | 2=moderate | 3 | 3=severe |
| 0  | 0=no                                                                                                          |                                                                                                                    |                                                                                                                                                                                          |   |      |   |        |   |            |   |          |
| 1  | 1=mild                                                                                                        |                                                                                                                    |                                                                                                                                                                                          |   |      |   |        |   |            |   |          |
| 2  | 2=moderate                                                                                                    |                                                                                                                    |                                                                                                                                                                                          |   |      |   |        |   |            |   |          |
| 3  | 3=severe                                                                                                      |                                                                                                                    |                                                                                                                                                                                          |   |      |   |        |   |            |   |          |

|     |                                                                                                               |                                                                                                                  |                                                                                                                                                                                          |   |      |   |        |   |            |   |          |
|-----|---------------------------------------------------------------------------------------------------------------|------------------------------------------------------------------------------------------------------------------|------------------------------------------------------------------------------------------------------------------------------------------------------------------------------------------|---|------|---|--------|---|------------|---|----------|
| 92  | <p>sympt_18_2</p> <p>Show the field ONLY if:<br/>[sympt_18] = "1" OR [sympt_18] = "2" OR [sympt_18] = "3"</p> | <p>Duration of Symptom<br/>(in days)</p> <p>(Skin rash)</p>                                                      | text (number)                                                                                                                                                                            |   |      |   |        |   |            |   |          |
| 93  | <p>sympt_18_3</p> <p>Show the field ONLY if:<br/>[sympt_18] = "1" OR [sympt_18] = "2" OR [sympt_18] = "3"</p> | <p>Details of the symptom<br/>(Can you describe the symptom in more detail?)</p> <p>(Skin rash)</p>              | notes                                                                                                                                                                                    |   |      |   |        |   |            |   |          |
| 94  | <p>sympt_19</p> <p>Show the field ONLY if:<br/>[covid_1] = "1" OR [covid_1] = "3"</p>                         | Hair loss                                                                                                        | <p>radio</p> <table border="1"> <tr><td>0</td><td>0=no</td></tr> <tr><td>1</td><td>1=mild</td></tr> <tr><td>2</td><td>2=moderate</td></tr> <tr><td>3</td><td>3=severe</td></tr> </table> | 0 | 0=no | 1 | 1=mild | 2 | 2=moderate | 3 | 3=severe |
| 0   | 0=no                                                                                                          |                                                                                                                  |                                                                                                                                                                                          |   |      |   |        |   |            |   |          |
| 1   | 1=mild                                                                                                        |                                                                                                                  |                                                                                                                                                                                          |   |      |   |        |   |            |   |          |
| 2   | 2=moderate                                                                                                    |                                                                                                                  |                                                                                                                                                                                          |   |      |   |        |   |            |   |          |
| 3   | 3=severe                                                                                                      |                                                                                                                  |                                                                                                                                                                                          |   |      |   |        |   |            |   |          |
| 95  | <p>sympt_19_2</p> <p>Show the field ONLY if:<br/>[sympt_19] = "1" OR [sympt_19] = "2" OR [sympt_19] = "3"</p> | <p>Duration of Symptom<br/>(in days)</p> <p>(Hair loss)</p>                                                      | text (number)                                                                                                                                                                            |   |      |   |        |   |            |   |          |
| 96  | <p>sympt_19_3</p> <p>Show the field ONLY if:<br/>[sympt_19] = "1" OR [sympt_19] = "2" OR [sympt_19] = "3"</p> | <p>Details of the symptom<br/>(Can you describe the symptom in more detail?)</p> <p>(Hair loss)</p>              | notes                                                                                                                                                                                    |   |      |   |        |   |            |   |          |
| 97  | <p>sympt_20</p> <p>Show the field ONLY if:<br/>[covid_1] = "1" OR [covid_1] = "3"</p>                         | Headache                                                                                                         | <p>radio</p> <table border="1"> <tr><td>0</td><td>0=no</td></tr> <tr><td>1</td><td>1=mild</td></tr> <tr><td>2</td><td>2=moderate</td></tr> <tr><td>3</td><td>3=severe</td></tr> </table> | 0 | 0=no | 1 | 1=mild | 2 | 2=moderate | 3 | 3=severe |
| 0   | 0=no                                                                                                          |                                                                                                                  |                                                                                                                                                                                          |   |      |   |        |   |            |   |          |
| 1   | 1=mild                                                                                                        |                                                                                                                  |                                                                                                                                                                                          |   |      |   |        |   |            |   |          |
| 2   | 2=moderate                                                                                                    |                                                                                                                  |                                                                                                                                                                                          |   |      |   |        |   |            |   |          |
| 3   | 3=severe                                                                                                      |                                                                                                                  |                                                                                                                                                                                          |   |      |   |        |   |            |   |          |
| 98  | <p>sympt_20_2</p> <p>Show the field ONLY if:<br/>[sympt_20] = "1" OR [sympt_20] = "2" OR [sympt_20] = "3"</p> | <p>Duration of Symptom<br/>(in days)</p> <p>(Headache)</p>                                                       | text (number)                                                                                                                                                                            |   |      |   |        |   |            |   |          |
| 99  | <p>sympt_20_3</p> <p>Show the field ONLY if:<br/>[sympt_20] = "1" OR [sympt_20] = "2" OR [sympt_20] = "3"</p> | <p>Details of the symptom<br/>(Can you describe the symptom in more detail?)</p> <p>(Headache)</p>               | notes                                                                                                                                                                                    |   |      |   |        |   |            |   |          |
| 100 | <p>sympt_21</p> <p>Show the field ONLY if:<br/>[covid_1] = "1" OR [covid_1] = "3"</p>                         | Weight loss                                                                                                      | <p>radio</p> <table border="1"> <tr><td>0</td><td>0=no</td></tr> <tr><td>1</td><td>1=mild</td></tr> <tr><td>2</td><td>2=moderate</td></tr> <tr><td>3</td><td>3=severe</td></tr> </table> | 0 | 0=no | 1 | 1=mild | 2 | 2=moderate | 3 | 3=severe |
| 0   | 0=no                                                                                                          |                                                                                                                  |                                                                                                                                                                                          |   |      |   |        |   |            |   |          |
| 1   | 1=mild                                                                                                        |                                                                                                                  |                                                                                                                                                                                          |   |      |   |        |   |            |   |          |
| 2   | 2=moderate                                                                                                    |                                                                                                                  |                                                                                                                                                                                          |   |      |   |        |   |            |   |          |
| 3   | 3=severe                                                                                                      |                                                                                                                  |                                                                                                                                                                                          |   |      |   |        |   |            |   |          |
| 101 | <p>sympt_21_2</p> <p>Show the field ONLY if:<br/>[sympt_21] = "1" OR [sympt_21] = "2" OR [sympt_21] = "3"</p> | <p>Duration of Symptom<br/>(in days)</p> <p>(Weight loss)</p>                                                    | text (number)                                                                                                                                                                            |   |      |   |        |   |            |   |          |
| 102 | <p>sympt_21_3</p> <p>Show the field ONLY if:<br/>[sympt_21] = "1" OR [sympt_21] = "2" OR [sympt_21] = "3"</p> | <p>Details of the symptom<br/>(Can you describe the symptom in more detail?)</p> <p>?lb</p> <p>(Weight loss)</p> | notes                                                                                                                                                                                    |   |      |   |        |   |            |   |          |

|     |                                                                                                                           |                                                                                                                                                              |                                                                                                                                                                                                                                                               |   |               |               |        |               |            |   |               |                                         |
|-----|---------------------------------------------------------------------------------------------------------------------------|--------------------------------------------------------------------------------------------------------------------------------------------------------------|---------------------------------------------------------------------------------------------------------------------------------------------------------------------------------------------------------------------------------------------------------------|---|---------------|---------------|--------|---------------|------------|---|---------------|-----------------------------------------|
| 103 | <p>sympt_22</p> <p>Show the field ONLY if:<br/>[dem_7] = "2" AND [covid_1] = "1" OR [dem_7] = "2" AND [covid_1] = "3"</p> | <p>Urinary issues</p>                                                                                                                                        | <p>radio</p> <table border="1"> <tr><td>0</td><td>0=no</td></tr> <tr><td>1</td><td>1=mild</td></tr> <tr><td>2</td><td>2=moderate</td></tr> <tr><td>3</td><td>3=severe</td></tr> </table>                                                                      | 0 | 0=no          | 1             | 1=mild | 2             | 2=moderate | 3 | 3=severe      |                                         |
| 0   | 0=no                                                                                                                      |                                                                                                                                                              |                                                                                                                                                                                                                                                               |   |               |               |        |               |            |   |               |                                         |
| 1   | 1=mild                                                                                                                    |                                                                                                                                                              |                                                                                                                                                                                                                                                               |   |               |               |        |               |            |   |               |                                         |
| 2   | 2=moderate                                                                                                                |                                                                                                                                                              |                                                                                                                                                                                                                                                               |   |               |               |        |               |            |   |               |                                         |
| 3   | 3=severe                                                                                                                  |                                                                                                                                                              |                                                                                                                                                                                                                                                               |   |               |               |        |               |            |   |               |                                         |
| 104 | <p>sympt_22_2</p> <p>Show the field ONLY if:<br/>[sympt_22] = "1" OR [sympt_22] = "2" OR [sympt_22] = "3"</p>             | <p>Duration of Symptom (in days)</p> <p>(Urinary issues)</p>                                                                                                 | <p>text (number)</p>                                                                                                                                                                                                                                          |   |               |               |        |               |            |   |               |                                         |
| 105 | <p>sympt_22_3</p> <p>Show the field ONLY if:<br/>[sympt_22] = "1" OR [sympt_22] = "2" OR [sympt_22] = "3"</p>             | <p>Details of the symptom (Can you describe the symptom in more detail?)</p> <p>(Urinary issues)</p>                                                         | <p>checkbox</p> <table border="1"> <tr><td>1</td><td>sympt_22_3__1</td><td>incontinence</td></tr> <tr><td>2</td><td>sympt_22_3__2</td><td>urgency</td></tr> <tr><td>3</td><td>sympt_22_3__3</td><td>frequency</td></tr> </table>                              | 1 | sympt_22_3__1 | incontinence  | 2      | sympt_22_3__2 | urgency    | 3 | sympt_22_3__3 | frequency                               |
| 1   | sympt_22_3__1                                                                                                             | incontinence                                                                                                                                                 |                                                                                                                                                                                                                                                               |   |               |               |        |               |            |   |               |                                         |
| 2   | sympt_22_3__2                                                                                                             | urgency                                                                                                                                                      |                                                                                                                                                                                                                                                               |   |               |               |        |               |            |   |               |                                         |
| 3   | sympt_22_3__3                                                                                                             | frequency                                                                                                                                                    |                                                                                                                                                                                                                                                               |   |               |               |        |               |            |   |               |                                         |
| 106 | <p>neuro_1</p> <p>Show the field ONLY if:<br/>[covid_1] = "1" OR [covid_1] = "3"</p>                                      | <p>Section Header: (Neuro COVID symptoms) Have you experienced any of the following new symptoms during your COVID/ COVID-like illness?</p> <p>Dizziness</p> | <p>radio</p> <table border="1"> <tr><td>0</td><td>0=no</td></tr> <tr><td>1</td><td>1=mild</td></tr> <tr><td>2</td><td>2=moderate</td></tr> <tr><td>3</td><td>3=severe</td></tr> </table>                                                                      | 0 | 0=no          | 1             | 1=mild | 2             | 2=moderate | 3 | 3=severe      |                                         |
| 0   | 0=no                                                                                                                      |                                                                                                                                                              |                                                                                                                                                                                                                                                               |   |               |               |        |               |            |   |               |                                         |
| 1   | 1=mild                                                                                                                    |                                                                                                                                                              |                                                                                                                                                                                                                                                               |   |               |               |        |               |            |   |               |                                         |
| 2   | 2=moderate                                                                                                                |                                                                                                                                                              |                                                                                                                                                                                                                                                               |   |               |               |        |               |            |   |               |                                         |
| 3   | 3=severe                                                                                                                  |                                                                                                                                                              |                                                                                                                                                                                                                                                               |   |               |               |        |               |            |   |               |                                         |
| 107 | <p>neuro_1_2</p> <p>Show the field ONLY if:<br/>[neuro_1] = "1" OR [neuro_1] = "2" OR [neuro_1] = "3"</p>                 | <p>Duration of Symptom (in days)</p> <p>(Dizziness)</p>                                                                                                      | <p>text (number)</p>                                                                                                                                                                                                                                          |   |               |               |        |               |            |   |               |                                         |
| 108 | <p>neuro_1_3</p> <p>Show the field ONLY if:<br/>[neuro_1] = "1" OR [neuro_1] = "2" OR [neuro_1] = "3"</p>                 | <p>Details of the symptom (Can you describe the symptom in more detail?)</p> <p>(Dizziness)</p>                                                              | <p>checkbox</p> <table border="1"> <tr><td>1</td><td>neuro_1_3__1</td><td>head spinning</td></tr> <tr><td>2</td><td>neuro_1_3__2</td><td>waviness</td></tr> <tr><td>3</td><td>neuro_1_3__3</td><td>lightheadedness upon changing positions</td></tr> </table> | 1 | neuro_1_3__1  | head spinning | 2      | neuro_1_3__2  | waviness   | 3 | neuro_1_3__3  | lightheadedness upon changing positions |
| 1   | neuro_1_3__1                                                                                                              | head spinning                                                                                                                                                |                                                                                                                                                                                                                                                               |   |               |               |        |               |            |   |               |                                         |
| 2   | neuro_1_3__2                                                                                                              | waviness                                                                                                                                                     |                                                                                                                                                                                                                                                               |   |               |               |        |               |            |   |               |                                         |
| 3   | neuro_1_3__3                                                                                                              | lightheadedness upon changing positions                                                                                                                      |                                                                                                                                                                                                                                                               |   |               |               |        |               |            |   |               |                                         |
| 109 | <p>neuro_2</p> <p>Show the field ONLY if:<br/>[covid_1] = "1" OR [covid_1] = "3"</p>                                      | <p>Temporary loss of hearing</p>                                                                                                                             | <p>radio</p> <table border="1"> <tr><td>0</td><td>0=no</td></tr> <tr><td>1</td><td>1=mild</td></tr> <tr><td>2</td><td>2=moderate</td></tr> <tr><td>3</td><td>3=severe</td></tr> </table>                                                                      | 0 | 0=no          | 1             | 1=mild | 2             | 2=moderate | 3 | 3=severe      |                                         |
| 0   | 0=no                                                                                                                      |                                                                                                                                                              |                                                                                                                                                                                                                                                               |   |               |               |        |               |            |   |               |                                         |
| 1   | 1=mild                                                                                                                    |                                                                                                                                                              |                                                                                                                                                                                                                                                               |   |               |               |        |               |            |   |               |                                         |
| 2   | 2=moderate                                                                                                                |                                                                                                                                                              |                                                                                                                                                                                                                                                               |   |               |               |        |               |            |   |               |                                         |
| 3   | 3=severe                                                                                                                  |                                                                                                                                                              |                                                                                                                                                                                                                                                               |   |               |               |        |               |            |   |               |                                         |
| 110 | <p>neuro_2_2</p> <p>Show the field ONLY if:<br/>[neuro_2] = "1" OR [neuro_2] = "2" OR [neuro_2] = "3"</p>                 | <p>Duration of Symptom (in days)</p> <p>(Temporary loss of hearing)</p>                                                                                      | <p>text (number)</p>                                                                                                                                                                                                                                          |   |               |               |        |               |            |   |               |                                         |
| 111 | <p>neuro_2_3</p> <p>Show the field ONLY if:<br/>[neuro_2] = "1" OR [neuro_2] = "2" OR [neuro_2] = "3"</p>                 | <p>Details of the symptom (Can you describe the symptom in more detail?)</p> <p>(Temporary loss of hearing)</p>                                              | <p>notes</p>                                                                                                                                                                                                                                                  |   |               |               |        |               |            |   |               |                                         |
| 112 | <p>neuro_3</p> <p>Show the field ONLY if:<br/>[covid_1] = "1" OR [covid_1] = "3"</p>                                      | <p>Tinnitus (Ringing in the ears)</p>                                                                                                                        | <p>radio</p> <table border="1"> <tr><td>0</td><td>0=no</td></tr> <tr><td>1</td><td>1=mild</td></tr> <tr><td>2</td><td>2=moderate</td></tr> <tr><td>3</td><td>3=severe</td></tr> </table>                                                                      | 0 | 0=no          | 1             | 1=mild | 2             | 2=moderate | 3 | 3=severe      |                                         |
| 0   | 0=no                                                                                                                      |                                                                                                                                                              |                                                                                                                                                                                                                                                               |   |               |               |        |               |            |   |               |                                         |
| 1   | 1=mild                                                                                                                    |                                                                                                                                                              |                                                                                                                                                                                                                                                               |   |               |               |        |               |            |   |               |                                         |
| 2   | 2=moderate                                                                                                                |                                                                                                                                                              |                                                                                                                                                                                                                                                               |   |               |               |        |               |            |   |               |                                         |
| 3   | 3=severe                                                                                                                  |                                                                                                                                                              |                                                                                                                                                                                                                                                               |   |               |               |        |               |            |   |               |                                         |
| 113 | <p>neuro_3_2</p> <p>Show the field ONLY if:<br/>[neuro_3] = "1" OR [neuro_3] = "2" OR [neuro_3] = "3"</p>                 | <p>Duration of Symptom (in days)</p> <p>(Tinnitus [Ringing in the ears])</p>                                                                                 | <p>text (number)</p>                                                                                                                                                                                                                                          |   |               |               |        |               |            |   |               |                                         |

|     |                                                                                               |                                                                                                                  |                                                           |
|-----|-----------------------------------------------------------------------------------------------|------------------------------------------------------------------------------------------------------------------|-----------------------------------------------------------|
| 114 | neuro_3_3<br>Show the field ONLY if:<br>[neuro_3] = "1" OR [neuro_3] = "2" OR [neuro_3] = "3" | Details of the symptom<br>(Can you describe the symptom in more detail?)<br><br>(Tinnitus [Ringing in the ears]) | notes                                                     |
| 115 | neuro_4<br>Show the field ONLY if:<br>[covid_1] = "1" OR [covid_1] = "3"                      | Visual changes                                                                                                   | radio<br>0 0=no<br>1 1=mild<br>2 2=moderate<br>3 3=severe |
| 116 | neuro_4_2<br>Show the field ONLY if:<br>[neuro_4] = "1" OR [neuro_4] = "2" OR [neuro_4] = "3" | Duration of Symptom<br>(in days)<br><br>(Visual changes)                                                         | text (number)                                             |
| 117 | neuro_4_3<br>Show the field ONLY if:<br>[neuro_4] = "1" OR [neuro_4] = "2" OR [neuro_4] = "3" | Details of the symptom<br>(Can you describe the symptom in more detail?)<br><br>(Visual changes)                 | notes                                                     |
| 118 | neuro_5<br>Show the field ONLY if:<br>[covid_1] = "1" OR [covid_1] = "3"                      | Double vision                                                                                                    | radio<br>0 0=no<br>1 1=mild<br>2 2=moderate<br>3 3=severe |
| 119 | neuro_5_2<br>Show the field ONLY if:<br>[neuro_5] = "1" OR [neuro_5] = "2" OR [neuro_5] = "3" | Duration of Symptom<br>(in days)<br><br>(Double vision)                                                          | text (number)                                             |
| 120 | neuro_5_3<br>Show the field ONLY if:<br>[neuro_5] = "1" OR [neuro_5] = "2" OR [neuro_5] = "3" | Details of the symptom<br>(Can you describe the symptom in more detail?)<br><br>(Double vision)                  | notes                                                     |
| 121 | neuro_6<br>Show the field ONLY if:<br>[covid_1] = "1" OR [covid_1] = "3"                      | Facial twitches                                                                                                  | radio<br>0 0=no<br>1 1=mild<br>2 2=moderate<br>3 3=severe |
| 122 | neuro_6_2<br>Show the field ONLY if:<br>[neuro_6] = "1" OR [neuro_6] = "2" OR [neuro_6] = "3" | Duration of Symptom<br>(in days)<br><br>(Facial twitches)                                                        | text (number)                                             |
| 123 | neuro_6_3<br>Show the field ONLY if:<br>[neuro_6] = "1" OR [neuro_6] = "2" OR [neuro_6] = "3" | Details of the symptom<br>(Can you describe the symptom in more detail?)<br><br>(Facial twitches)                | notes                                                     |

|     |                                                                                                   |                                                                                                   |                                                           |
|-----|---------------------------------------------------------------------------------------------------|---------------------------------------------------------------------------------------------------|-----------------------------------------------------------|
| 124 | neuro_7<br>Show the field ONLY if:<br>[covid_1] = "1" OR [covid_1] = "3"                          | Body/Arms/Leg twitches                                                                            | radio<br>0 0=no<br>1 1=mild<br>2 2=moderate<br>3 3=severe |
| 125 | neuro_7_2<br>Show the field ONLY if:<br>[neuro_7] = "1" OR [neuro_7] = "2" OR [neuro_7] = "3"     | Duration of Symptom (in days)<br>(Body/Arms/Leg twitches)                                         | text (number)                                             |
| 126 | neuro_7_3<br>Show the field ONLY if:<br>[neuro_7] = "1" OR [neuro_7] = "2" OR [neuro_7] = "3"     | Details of the symptom (Can you describe the symptom in more detail?)<br>(Body/Arms/Leg twitches) | notes                                                     |
| 127 | neuro_8<br>Show the field ONLY if:<br>[covid_1] = "1" OR [covid_1] = "3"                          | Seizure                                                                                           | radio<br>0 0=no<br>1 1=mild<br>2 2=moderate<br>3 3=severe |
| 128 | neuro_8_2<br>Show the field ONLY if:<br>[neuro_8] = "1" OR [neuro_8] = "2" OR [neuro_8] = "3"     | Duration of Symptom (in days)<br>(Seizure)                                                        | text (number)                                             |
| 129 | neuro_8_3<br>Show the field ONLY if:<br>[neuro_8] = "1" OR [neuro_8] = "2" OR [neuro_8] = "3"     | Details of the symptom (Can you describe the symptom in more detail?)<br>(Seizure)                | notes                                                     |
| 130 | neuro_9<br>Show the field ONLY if:<br>[covid_1] = "1" OR [covid_1] = "3"                          | Loss of consciousness                                                                             | radio<br>0 0=no<br>1 1=mild<br>2 2=moderate<br>3 3=severe |
| 131 | neuro_9_2<br>Show the field ONLY if:<br>[neuro_9] = "1" OR [neuro_9] = "2" OR [neuro_9] = "3"     | Duration of Symptom (in days)<br>(Loss of consciousness)                                          | text (number)                                             |
| 132 | neuro_9_3<br>Show the field ONLY if:<br>[neuro_9] = "1" OR [neuro_9] = "2" OR [neuro_9] = "3"     | Details of the symptom (Can you describe the symptom in more detail?)<br>(Loss of consciousness)  | notes                                                     |
| 133 | neuro_10<br>Show the field ONLY if:<br>[covid_1] = "1" OR [covid_1] = "3"                         | Confusion                                                                                         | radio<br>0 0=no<br>1 1=mild<br>2 2=moderate<br>3 3=severe |
| 134 | neuro_10_2<br>Show the field ONLY if:<br>[neuro_10] = "1" OR [neuro_10] = "2" OR [neuro_10] = "3" | Duration of Symptom (in days)<br>(Confusion)                                                      | text (number)                                             |

|     |                                                                                                               |                                                                                                                              |                                                           |
|-----|---------------------------------------------------------------------------------------------------------------|------------------------------------------------------------------------------------------------------------------------------|-----------------------------------------------------------|
| 135 | neuro_10_3<br>Show the field ONLY if:<br>[neuro_10] = "1" OR [neuro_10] = "2" OR [neuro_10] = "3"             | Details of the symptom<br>(Can you describe the symptom in more detail?)<br><br>(Confusion)                                  | radio<br>1 Intermittent<br>2 Constant during illness      |
| 136 | neuro_11<br>Show the field ONLY if:<br>[dem_7] = "2" AND [covid_1] = "1" OR [dem_7] = "2" AND [covid_1] = "3" | Memory Loss                                                                                                                  | radio<br>0 0=no<br>1 1=mild<br>2 2=moderate<br>3 3=severe |
| 137 | neuro_11_2<br>Show the field ONLY if:<br>[neuro_11] = "1" OR [neuro_11] = "2" OR [neuro_11] = "3"             | Duration of Symptom<br>(in days)<br><br>(Memory loss)                                                                        | text (number)                                             |
| 138 | neuro_11_3<br>Show the field ONLY if:<br>[neuro_11] = "1" OR [neuro_11] = "2" OR [neuro_11] = "3"             | Details of the symptom<br>(Can you describe the symptom in more detail?)<br><br>(Memory loss)                                | radio<br>1 Temporary<br>2 Since                           |
| 139 | neuro_12<br>Show the field ONLY if:<br>[dem_7] = "2" AND [covid_1] = "1" OR [dem_7] = "2" AND [covid_1] = "3" | Hallucinations                                                                                                               | radio<br>0 0=no<br>1 1=mild<br>2 2=moderate<br>3 3=severe |
| 140 | neuro_12_2<br>Show the field ONLY if:<br>[neuro_12] = "1" OR [neuro_12] = "2" OR [neuro_12] = "3"             | Duration of Symptom<br>(in days)<br><br>(Hallucinations)                                                                     | text (number)                                             |
| 141 | neuro_12_3<br>Show the field ONLY if:<br>[neuro_12] = "1" OR [neuro_12] = "2" OR [neuro_12] = "3"             | Details of the symptom<br>(Can you describe the symptom in more detail?)<br>(Type of hallucinations)<br><br>(Hallucinations) | notes                                                     |
| 142 | neuro_13<br>Show the field ONLY if:<br>[covid_1] = "1" OR [covid_1] = "3"                                     | Nerve pain                                                                                                                   | radio<br>0 0=no<br>1 1=mild<br>2 2=moderate<br>3 3=severe |
| 143 | neuro_13_2<br>Show the field ONLY if:<br>[neuro_13] = "1" OR [neuro_13] = "2" OR [neuro_13] = "3"             | Duration of Symptom<br>(in days)<br><br>(Nerve pain)                                                                         | text (number)                                             |
| 144 | neuro_13_3<br>Show the field ONLY if:<br>[neuro_13] = "1" OR [neuro_13] = "2" OR [neuro_13] = "3"             | Details of the symptom<br>(Can you describe the symptom in more detail?)<br><br>(Nerve pain)                                 | notes                                                     |
| 145 | neuro_14<br>Show the field ONLY if:<br>[dem_7] = "2" AND [covid_1] = "1" OR [dem_7] = "2" AND [covid_1] = "3" | Numbness/tingling                                                                                                            | radio<br>0 0=no<br>1 1=mild<br>2 2=moderate<br>3 3=severe |



|     |                                                                                                               |                                                                                                        |                                                                                                                                                                                                               |   |               |      |        |               |            |   |               |      |
|-----|---------------------------------------------------------------------------------------------------------------|--------------------------------------------------------------------------------------------------------|---------------------------------------------------------------------------------------------------------------------------------------------------------------------------------------------------------------|---|---------------|------|--------|---------------|------------|---|---------------|------|
| 146 | neuro_14_2<br>Show the field ONLY if:<br>[neuro_14] = "1" OR [neuro_14] = "2" OR [neuro_14] = "3"             | Duration of Symptom<br>(in days)<br><br>(Numbness/tingling)                                            | text (number)                                                                                                                                                                                                 |   |               |      |        |               |            |   |               |      |
| 147 | neuro_14_3<br>Show the field ONLY if:<br>[neuro_14] = "1" OR [neuro_14] = "2" OR [neuro_14] = "3"             | Details of the symptom<br>(Can you describe the symptom in more detail?)<br><br>(Numbness/tingling)    | notes                                                                                                                                                                                                         |   |               |      |        |               |            |   |               |      |
| 148 | neuro_15<br>Show the field ONLY if:<br>[covid_1] = "1" OR [covid_1] = "3"                                     | Loss of sensation                                                                                      | radio<br><table border="1"> <tr><td>0</td><td>0=no</td></tr> <tr><td>1</td><td>1=mild</td></tr> <tr><td>2</td><td>2=moderate</td></tr> <tr><td>3</td><td>3=severe</td></tr> </table>                          | 0 | 0=no          | 1    | 1=mild | 2             | 2=moderate | 3 | 3=severe      |      |
| 0   | 0=no                                                                                                          |                                                                                                        |                                                                                                                                                                                                               |   |               |      |        |               |            |   |               |      |
| 1   | 1=mild                                                                                                        |                                                                                                        |                                                                                                                                                                                                               |   |               |      |        |               |            |   |               |      |
| 2   | 2=moderate                                                                                                    |                                                                                                        |                                                                                                                                                                                                               |   |               |      |        |               |            |   |               |      |
| 3   | 3=severe                                                                                                      |                                                                                                        |                                                                                                                                                                                                               |   |               |      |        |               |            |   |               |      |
| 149 | neuro_15_2<br>Show the field ONLY if:<br>[neuro_15] = "1" OR [neuro_15] = "2" OR [neuro_15] = "3"             | Duration of Symptom<br>(in days)<br><br>(Loss of sensation)                                            | text (number)                                                                                                                                                                                                 |   |               |      |        |               |            |   |               |      |
| 150 | neuro_15_3<br>Show the field ONLY if:<br>[neuro_15] = "1" OR [neuro_15] = "2" OR [neuro_15] = "3"             | Details of the symptom<br>(Can you describe the symptom in more detail?)<br><br>(Loss of sensation)    | checkbox<br><table border="1"> <tr><td>1</td><td>neuro_15_3__1</td><td>Pain</td></tr> <tr><td>2</td><td>neuro_15_3__2</td><td>Touch</td></tr> <tr><td>3</td><td>neuro_15_3__3</td><td>Temp</td></tr> </table> | 1 | neuro_15_3__1 | Pain | 2      | neuro_15_3__2 | Touch      | 3 | neuro_15_3__3 | Temp |
| 1   | neuro_15_3__1                                                                                                 | Pain                                                                                                   |                                                                                                                                                                                                               |   |               |      |        |               |            |   |               |      |
| 2   | neuro_15_3__2                                                                                                 | Touch                                                                                                  |                                                                                                                                                                                                               |   |               |      |        |               |            |   |               |      |
| 3   | neuro_15_3__3                                                                                                 | Temp                                                                                                   |                                                                                                                                                                                                               |   |               |      |        |               |            |   |               |      |
| 151 | neuro_16<br>Show the field ONLY if:<br>[covid_1] = "1" OR [covid_1] = "3"                                     | Weakness                                                                                               | radio<br><table border="1"> <tr><td>0</td><td>0=no</td></tr> <tr><td>1</td><td>1=mild</td></tr> <tr><td>2</td><td>2=moderate</td></tr> <tr><td>3</td><td>3=severe</td></tr> </table>                          | 0 | 0=no          | 1    | 1=mild | 2             | 2=moderate | 3 | 3=severe      |      |
| 0   | 0=no                                                                                                          |                                                                                                        |                                                                                                                                                                                                               |   |               |      |        |               |            |   |               |      |
| 1   | 1=mild                                                                                                        |                                                                                                        |                                                                                                                                                                                                               |   |               |      |        |               |            |   |               |      |
| 2   | 2=moderate                                                                                                    |                                                                                                        |                                                                                                                                                                                                               |   |               |      |        |               |            |   |               |      |
| 3   | 3=severe                                                                                                      |                                                                                                        |                                                                                                                                                                                                               |   |               |      |        |               |            |   |               |      |
| 152 | neuro_16_2<br>Show the field ONLY if:<br>[neuro_16] = "1" OR [neuro_16] = "2" OR [neuro_16] = "3"             | Duration of Symptom<br>(in days)<br><br>(Weakness)                                                     | text (number)                                                                                                                                                                                                 |   |               |      |        |               |            |   |               |      |
| 153 | neuro_16_3<br>Show the field ONLY if:<br>[neuro_16] = "1" OR [neuro_16] = "2" OR [neuro_16] = "3"             | Details of the symptom<br>(Can you describe the symptom in more detail?)<br>(Where?)<br><br>(Weakness) | notes                                                                                                                                                                                                         |   |               |      |        |               |            |   |               |      |
| 154 | neuro_17<br>Show the field ONLY if:<br>[dem_7] = "2" AND [covid_1] = "1" OR [dem_7] = "2" AND [covid_1] = "3" | Tremor                                                                                                 | radio<br><table border="1"> <tr><td>0</td><td>0=no</td></tr> <tr><td>1</td><td>1=mild</td></tr> <tr><td>2</td><td>2=moderate</td></tr> <tr><td>3</td><td>3=severe</td></tr> </table>                          | 0 | 0=no          | 1    | 1=mild | 2             | 2=moderate | 3 | 3=severe      |      |
| 0   | 0=no                                                                                                          |                                                                                                        |                                                                                                                                                                                                               |   |               |      |        |               |            |   |               |      |
| 1   | 1=mild                                                                                                        |                                                                                                        |                                                                                                                                                                                                               |   |               |      |        |               |            |   |               |      |
| 2   | 2=moderate                                                                                                    |                                                                                                        |                                                                                                                                                                                                               |   |               |      |        |               |            |   |               |      |
| 3   | 3=severe                                                                                                      |                                                                                                        |                                                                                                                                                                                                               |   |               |      |        |               |            |   |               |      |
| 155 | neuro_17_2<br>Show the field ONLY if:<br>[neuro_17] = "1" OR [neuro_17] = "2" OR [neuro_17] = "3"             | Duration of Symptom<br>(in days)<br><br>(Tremor)                                                       | text (number)                                                                                                                                                                                                 |   |               |      |        |               |            |   |               |      |
| 156 | neuro_17_3<br>Show the field ONLY if:<br>[neuro_17] = "1" OR [neuro_17] = "2" OR [neuro_17] = "3"             | Details of the symptom<br>(Can you describe the symptom in more detail?)<br><br>(Tremor)               | notes                                                                                                                                                                                                         |   |               |      |        |               |            |   |               |      |

|     |                                                                                                               |                                                                                                             |                                                           |
|-----|---------------------------------------------------------------------------------------------------------------|-------------------------------------------------------------------------------------------------------------|-----------------------------------------------------------|
| 157 | neuro_18<br>Show the field ONLY if:<br>[dem_7] = "2" AND [covid_1] = "1" OR [dem_7] = "2" AND [covid_1] = "3" | Rigidity                                                                                                    | radio<br>0 0=no<br>1 1=mild<br>2 2=moderate<br>3 3=severe |
| 158 | neuro_18_2<br>Show the field ONLY if:<br>[neuro_18] = "1" OR [neuro_18] = "2" OR [neuro_18] = "3"             | Duration of Symptom (in days)<br>(Rigidity)                                                                 | text (number)                                             |
| 159 | neuro_18_3<br>Show the field ONLY if:<br>[neuro_18] = "1" OR [neuro_18] = "2" OR [neuro_18] = "3"             | Details of the symptom (Can you describe the symptom in more detail?)<br>(Rigidity)                         | notes                                                     |
| 160 | neuro_19<br>Show the field ONLY if:<br>[dem_7] = "2" AND [covid_1] = "1" OR [dem_7] = "2" AND [covid_1] = "3" | Difficulty walking                                                                                          | radio<br>0 0=no<br>1 1=mild<br>2 2=moderate<br>3 3=severe |
| 161 | neuro_19_2<br>Show the field ONLY if:<br>[neuro_19] = "1" OR [neuro_19] = "2" OR [neuro_19] = "3"             | Duration of Symptom (in days)<br>(Difficulty walking)                                                       | text (number)                                             |
| 162 | neuro_19_3<br>Show the field ONLY if:<br>[neuro_19] = "1" OR [neuro_19] = "2" OR [neuro_19] = "3"             | Details of the symptom (Can you describe the symptom in more detail?)<br>(Difficulty walking)               | notes                                                     |
| 163 | neuro_20<br>Show the field ONLY if:<br>[dem_7] = "2" AND [covid_1] = "1" OR [dem_7] = "2" AND [covid_1] = "3" | (Ataxia) Difficulty with balance                                                                            | radio<br>0 0=no<br>1 1=mild<br>2 2=moderate<br>3 3=severe |
| 164 | neuro_20_2<br>Show the field ONLY if:<br>[neuro_20] = "1" OR [neuro_20] = "2" OR [neuro_20] = "3"             | Duration of Symptom (in days)<br>[(Ataxia) Difficulty with balance]                                         | text (number)                                             |
| 165 | neuro_20_3<br>Show the field ONLY if:<br>[neuro_20] = "1" OR [neuro_20] = "2" OR [neuro_20] = "3"             | Details of the symptom (Can you describe the symptom in more detail?)<br>[(Ataxia) Difficulty with balance] | notes                                                     |
| 166 | neuro_21<br>Show the field ONLY if:<br>[dem_7] = "2" AND [covid_1] = "1" OR [dem_7] = "2" AND [covid_1] = "3" | Falls                                                                                                       | radio<br>0 0=no<br>1 1=mild<br>2 2=moderate<br>3 3=severe |
| 167 | neuro_21_2<br>Show the field ONLY if:<br>[neuro_21] = "1" OR [neuro_21] = "2" OR [neuro_21] = "3"             | Duration of Symptom (in days)<br>(Falls)                                                                    | text (number)                                             |

|     |                                                                                                               |                                                                                                                       |                                                           |
|-----|---------------------------------------------------------------------------------------------------------------|-----------------------------------------------------------------------------------------------------------------------|-----------------------------------------------------------|
| 168 | neuro_21_3<br>Show the field ONLY if:<br>[neuro_21] = "1" OR [neuro_21] = "2" OR [neuro_21] = "3"             | Details of the symptom<br>(Can you describe the symptom in more detail?)<br><br>(Falls)                               | notes                                                     |
| 169 | neuro_22<br>Show the field ONLY if:<br>[dem_7] = "2" AND [covid_1] = "1" OR [dem_7] = "2" AND [covid_1] = "3" | Bradykinesia (slowness in movement)                                                                                   | radio<br>0 0=no<br>1 1=mild<br>2 2=moderate<br>3 3=severe |
| 170 | neuro_22_2<br>Show the field ONLY if:<br>[neuro_22] = "1" OR [neuro_22] = "2" OR [neuro_22] = "3"             | Duration of Symptom<br>(in days)<br><br>(Bradykinesia (slowness in movement))                                         | text (number)                                             |
| 171 | neuro_22_3<br>Show the field ONLY if:<br>[neuro_22] = "1" OR [neuro_22] = "2" OR [neuro_22] = "3"             | Details of the symptom<br>(Can you describe the symptom in more detail?)<br><br>(Bradykinesia (slowness in movement)) | notes                                                     |
| 172 | neuro_23<br>Show the field ONLY if:<br>[dem_7] = "2" AND [covid_1] = "1" OR [dem_7] = "2" AND [covid_1] = "3" | Freezing of gait                                                                                                      | radio<br>0 0=no<br>1 1=mild<br>2 2=moderate<br>3 3=severe |
| 173 | neuro_23_1<br>Show the field ONLY if:<br>[neuro_23] = "1" OR [neuro_23] = "2" OR [neuro_23] = "3"             | Duration of Symptom (in days)<br><br>(Freezing of gait)                                                               | text (number)                                             |
| 174 | neuro_23_2<br>Show the field ONLY if:<br>[neuro_23] = "1" OR [neuro_23] = "2" OR [neuro_23] = "3"             | Details of the symptom<br>(Can you describe the symptom in more detail?)<br><br>(Freezing of gait)                    | notes                                                     |
| 175 | neuro_24<br>Show the field ONLY if:<br>[dem_7] = "2" AND [covid_1] = "1" OR [dem_7] = "2" AND [covid_1] = "3" | Dyskinesias                                                                                                           | radio<br>0 0=no<br>1 1=mild<br>2 2=moderate<br>3 3=severe |
| 176 | neuro_24_1<br>Show the field ONLY if:<br>[neuro_24] = "1" OR [neuro_24] = "2" OR [neuro_24] = "3"             | Duration of Symptom (in days)<br><br>(Dyskinesias)                                                                    | text (number)                                             |
| 177 | neuro_24_2<br>Show the field ONLY if:<br>[neuro_24] = "1" OR [neuro_24] = "2" OR [neuro_24] = "3"             | Details of the symptom<br>(Can you describe the symptom in more detail?)<br><br>(Dyskinesias)                         | notes                                                     |
| 178 | neuro_25<br>Show the field ONLY if:<br>[dem_7] = "2" AND [covid_1] = "1" OR [dem_7] = "2" AND [covid_1] = "3" | Dystonia                                                                                                              | radio<br>0 0=no<br>1 1=mild<br>2 2=moderate<br>3 3=severe |

|     |                                                                                                               |                                                                                               |                                                           |
|-----|---------------------------------------------------------------------------------------------------------------|-----------------------------------------------------------------------------------------------|-----------------------------------------------------------|
| 179 | neuro_25_1<br>Show the field ONLY if:<br>[neuro_25] = "1" OR [neuro_25] = "2" OR [neuro_25] = "3"             | Duration of Symptom (in days)<br>(Dystonia)                                                   | text (number)                                             |
| 180 | neuro_25_2<br>Show the field ONLY if:<br>[neuro_25] = "1" OR [neuro_25] = "2" OR [neuro_25] = "3"             | Details of the symptom<br>(Can you describe the symptom in more detail?)<br>(Dystonia)        | notes                                                     |
| 181 | neuro_26<br>Show the field ONLY if:<br>[dem_7] = "2" AND [covid_1] = "1" OR [dem_7] = "2" AND [covid_1] = "3" | Sleep- Insomnia                                                                               | radio<br>0 0=no<br>1 1=mild<br>2 2=moderate<br>3 3=severe |
| 182 | neuro_26_1<br>Show the field ONLY if:<br>[neuro_26] = "1" OR [neuro_26] = "2" OR [neuro_26] = "3"             | Duration of Symptom (in days)<br>(Sleep- Insomnia)                                            | text (number)                                             |
| 183 | neuro_26_2<br>Show the field ONLY if:<br>[neuro_26] = "1" OR [neuro_26] = "2" OR [neuro_26] = "3"             | Details of the symptom<br>(Can you describe the symptom in more detail?)<br>(Sleep- Insomnia) | notes                                                     |
| 184 | neuro_27<br>Show the field ONLY if:<br>[dem_7] = "2" AND [covid_1] = "1" OR [dem_7] = "2" AND [covid_1] = "3" | Anxiety                                                                                       | radio<br>0 0=no<br>1 1=mild<br>2 2=moderate<br>3 3=severe |
| 185 | neuro_27_1<br>Show the field ONLY if:<br>[neuro_27] = "1" OR [neuro_27] = "2" OR [neuro_27] = "3"             | Duration of Symptom (in days)<br>(Anxiety)                                                    | text (number)                                             |
| 186 | neuro_27_2<br>Show the field ONLY if:<br>[neuro_27] = "1" OR [neuro_27] = "2" OR [neuro_27] = "3"             | Details of the symptom<br>(Can you describe the symptom in more detail?)<br>(Anxiety)         | notes                                                     |
| 187 | neuro_28<br>Show the field ONLY if:<br>[dem_7] = "2" AND [covid_1] = "1" OR [dem_7] = "2" AND [covid_1] = "3" | Apathy                                                                                        | radio<br>0 0=no<br>1 1=mild<br>2 2=moderate<br>3 3=severe |
| 188 | neuro_28_1<br>Show the field ONLY if:<br>[neuro_28] = "1" OR [neuro_28] = "2" OR [neuro_28] = "3"             | Duration of Symptom (in days)<br>(Apathy)                                                     | text (number)                                             |
| 189 | neuro_28_2<br>Show the field ONLY if:<br>[neuro_28] = "1" OR [neuro_28] = "2" OR [neuro_28] = "3"             | Details of the symptom<br>(Can you describe the symptom in more detail?)<br>(Apathy)          | notes                                                     |

|     |                                                                                                               |                                                                                            |                                                           |
|-----|---------------------------------------------------------------------------------------------------------------|--------------------------------------------------------------------------------------------|-----------------------------------------------------------|
| 190 | neuro_29<br>Show the field ONLY if:<br>[dem_7] = "2" AND [covid_1] = "1" OR [dem_7] = "2" AND [covid_1] = "3" | Constipation                                                                               | radio<br>0 0=no<br>1 1=mild<br>2 2=moderate<br>3 3=severe |
| 191 | neuro_29_1<br>Show the field ONLY if:<br>[neuro_29] = "1" OR [neuro_29] = "2" OR [neuro_29] = "3"             | Duration of Symptom (in days)<br>(Constipation)                                            | text (number)                                             |
| 192 | neuro_29_2<br>Show the field ONLY if:<br>[neuro_29] = "1" OR [neuro_29] = "2" OR [neuro_29] = "3"             | Details of the symptom<br>(Can you describe the symptom in more detail?)<br>(Constipation) | notes                                                     |
| 193 | neuro_30<br>Show the field ONLY if:<br>[dem_7] = "2" AND [covid_1] = "1" OR [dem_7] = "2" AND [covid_1] = "3" | Pain                                                                                       | radio<br>0 0=no<br>1 1=mild<br>2 2=moderate<br>3 3=severe |
| 194 | neuro_30_1<br>Show the field ONLY if:<br>[neuro_30] = "1" OR [neuro_30] = "2" OR [neuro_30] = "3"             | Duration of Symptom (in days)<br>(Pain)                                                    | text (number)                                             |
| 195 | neuro_30_2<br>Show the field ONLY if:<br>[neuro_30] = "1" OR [neuro_30] = "2" OR [neuro_30] = "3"             | Details of the symptom<br>(Can you describe the symptom in more detail?)<br>(Pain)         | notes                                                     |
| 196 | neuro_31<br>Show the field ONLY if:<br>[dem_7] = "2" AND [covid_1] = "1" OR [dem_7] = "2" AND [covid_1] = "3" | OFF time                                                                                   | radio<br>0 0=no<br>1 1=mild<br>2 2=moderate<br>3 3=severe |
| 197 | neuro_31_1<br>Show the field ONLY if:<br>[neuro_31] = "1" OR [neuro_31] = "2" OR [neuro_31] = "3"             | Duration of Symptom (in days)<br>(OFF time)                                                | text (number)                                             |
| 198 | neuro_31_2<br>Show the field ONLY if:<br>[neuro_31] = "1" OR [neuro_31] = "2" OR [neuro_31] = "3"             | Details of the symptom<br>(Can you describe the symptom in more detail?)<br>(OFF time)     | notes                                                     |
| 199 | neuro_32<br>Show the field ONLY if:<br>[covid_1] = "1" OR [covid_1] = "3"                                     | Other                                                                                      | radio<br>0 0=no<br>1 1=mild<br>2 2=moderate<br>3 3=severe |
| 200 | neuro_32_1<br>Show the field ONLY if:<br>[neuro_32] = "1" OR [neuro_32] = "2" OR [neuro_32] = "3"             | Duration of Symptom (in days)<br>(Other)                                                   | text (number)                                             |

|     |                                                                                                   |                                                                                                                                                                |                                                                                                           |   |     |   |    |
|-----|---------------------------------------------------------------------------------------------------|----------------------------------------------------------------------------------------------------------------------------------------------------------------|-----------------------------------------------------------------------------------------------------------|---|-----|---|----|
| 201 | neuro_32_2<br>Show the field ONLY if:<br>[neuro_32] = "1" OR [neuro_32] = "2" OR [neuro_32] = "3" | Details of the symptom<br>(Can you describe the symptom in more detail?)<br><br>(Other)                                                                        | notes                                                                                                     |   |     |   |    |
| 202 | medhist_1_1<br>Show the field ONLY if:<br>[covid_1] = "1" OR [covid_1] = "3"                      | Section Header: <i>(Past Medical History) Have you been Diagnosed with any of the following conditions before COVID?</i><br>Hypertension (High Blood Pressure) | radio (Matrix)<br><table border="1"><tr><td>1</td><td>Yes</td></tr><tr><td>2</td><td>No</td></tr></table> | 1 | Yes | 2 | No |
| 1   | Yes                                                                                               |                                                                                                                                                                |                                                                                                           |   |     |   |    |
| 2   | No                                                                                                |                                                                                                                                                                |                                                                                                           |   |     |   |    |
| 203 | medhist_1_2<br>Show the field ONLY if:<br>[covid_1] = "1" OR [covid_1] = "3"                      | Diabetes Mellitus (Childhood onset)                                                                                                                            | radio (Matrix)<br><table border="1"><tr><td>1</td><td>Yes</td></tr><tr><td>2</td><td>No</td></tr></table> | 1 | Yes | 2 | No |
| 1   | Yes                                                                                               |                                                                                                                                                                |                                                                                                           |   |     |   |    |
| 2   | No                                                                                                |                                                                                                                                                                |                                                                                                           |   |     |   |    |
| 204 | medhist_1_3<br>Show the field ONLY if:<br>[covid_1] = "1" OR [covid_1] = "3"                      | Diabetes Mellitus (Adult onset)                                                                                                                                | radio (Matrix)<br><table border="1"><tr><td>1</td><td>Yes</td></tr><tr><td>2</td><td>No</td></tr></table> | 1 | Yes | 2 | No |
| 1   | Yes                                                                                               |                                                                                                                                                                |                                                                                                           |   |     |   |    |
| 2   | No                                                                                                |                                                                                                                                                                |                                                                                                           |   |     |   |    |
| 205 | medhist_1_4<br>Show the field ONLY if:<br>[covid_1] = "1" OR [covid_1] = "3"                      | Myocardial infarct (Heart Attach)                                                                                                                              | radio (Matrix)<br><table border="1"><tr><td>1</td><td>Yes</td></tr><tr><td>2</td><td>No</td></tr></table> | 1 | Yes | 2 | No |
| 1   | Yes                                                                                               |                                                                                                                                                                |                                                                                                           |   |     |   |    |
| 2   | No                                                                                                |                                                                                                                                                                |                                                                                                           |   |     |   |    |
| 206 | medhist_1_5<br>Show the field ONLY if:<br>[covid_1] = "1" OR [covid_1] = "3"                      | Congestive heart Failure                                                                                                                                       | radio (Matrix)<br><table border="1"><tr><td>1</td><td>Yes</td></tr><tr><td>2</td><td>No</td></tr></table> | 1 | Yes | 2 | No |
| 1   | Yes                                                                                               |                                                                                                                                                                |                                                                                                           |   |     |   |    |
| 2   | No                                                                                                |                                                                                                                                                                |                                                                                                           |   |     |   |    |
| 207 | medhist_1_6<br>Show the field ONLY if:<br>[covid_1] = "1" OR [covid_1] = "3"                      | Arrhythmia/ Atrial Fibrillation                                                                                                                                | radio (Matrix)<br><table border="1"><tr><td>1</td><td>Yes</td></tr><tr><td>2</td><td>No</td></tr></table> | 1 | Yes | 2 | No |
| 1   | Yes                                                                                               |                                                                                                                                                                |                                                                                                           |   |     |   |    |
| 2   | No                                                                                                |                                                                                                                                                                |                                                                                                           |   |     |   |    |
| 208 | medhist_1_7<br>Show the field ONLY if:<br>[covid_1] = "1" OR [covid_1] = "3"                      | Hypercholesterolemia (High Cholesterol)                                                                                                                        | radio (Matrix)<br><table border="1"><tr><td>1</td><td>Yes</td></tr><tr><td>2</td><td>No</td></tr></table> | 1 | Yes | 2 | No |
| 1   | Yes                                                                                               |                                                                                                                                                                |                                                                                                           |   |     |   |    |
| 2   | No                                                                                                |                                                                                                                                                                |                                                                                                           |   |     |   |    |
| 209 | medhist_1_8<br>Show the field ONLY if:<br>[covid_1] = "1" OR [covid_1] = "3"                      | Hearing Loss                                                                                                                                                   | radio (Matrix)<br><table border="1"><tr><td>1</td><td>Yes</td></tr><tr><td>2</td><td>No</td></tr></table> | 1 | Yes | 2 | No |
| 1   | Yes                                                                                               |                                                                                                                                                                |                                                                                                           |   |     |   |    |
| 2   | No                                                                                                |                                                                                                                                                                |                                                                                                           |   |     |   |    |
| 210 | medhist_1_9<br>Show the field ONLY if:<br>[covid_1] = "1" OR [covid_1] = "3"                      | Loss of smell                                                                                                                                                  | radio (Matrix)<br><table border="1"><tr><td>1</td><td>Yes</td></tr><tr><td>2</td><td>No</td></tr></table> | 1 | Yes | 2 | No |
| 1   | Yes                                                                                               |                                                                                                                                                                |                                                                                                           |   |     |   |    |
| 2   | No                                                                                                |                                                                                                                                                                |                                                                                                           |   |     |   |    |
| 211 | medhist_1_10<br>Show the field ONLY if:<br>[covid_1] = "1" OR [covid_1] = "3"                     | Lung disease (including emphysema)                                                                                                                             | radio (Matrix)<br><table border="1"><tr><td>1</td><td>Yes</td></tr><tr><td>2</td><td>No</td></tr></table> | 1 | Yes | 2 | No |
| 1   | Yes                                                                                               |                                                                                                                                                                |                                                                                                           |   |     |   |    |
| 2   | No                                                                                                |                                                                                                                                                                |                                                                                                           |   |     |   |    |
| 212 | medhist_1_11<br>Show the field ONLY if:<br>[covid_1] = "1" OR [covid_1] = "3"                     | Thyroid disease (not cancer, including Grave's disease)                                                                                                        | radio (Matrix)<br><table border="1"><tr><td>1</td><td>Yes</td></tr><tr><td>2</td><td>No</td></tr></table> | 1 | Yes | 2 | No |
| 1   | Yes                                                                                               |                                                                                                                                                                |                                                                                                           |   |     |   |    |
| 2   | No                                                                                                |                                                                                                                                                                |                                                                                                           |   |     |   |    |
| 213 | medhist_1_12<br>Show the field ONLY if:<br>[covid_1] = "1" OR [covid_1] = "3"                     | Liver disease                                                                                                                                                  | radio (Matrix)<br><table border="1"><tr><td>1</td><td>Yes</td></tr><tr><td>2</td><td>No</td></tr></table> | 1 | Yes | 2 | No |
| 1   | Yes                                                                                               |                                                                                                                                                                |                                                                                                           |   |     |   |    |
| 2   | No                                                                                                |                                                                                                                                                                |                                                                                                           |   |     |   |    |
| 214 | medhist_1_13<br>Show the field ONLY if:<br>[covid_1] = "1" OR [covid_1] = "3"                     | Renal insufficiency (kidney disease)                                                                                                                           | radio (Matrix)<br><table border="1"><tr><td>1</td><td>Yes</td></tr><tr><td>2</td><td>No</td></tr></table> | 1 | Yes | 2 | No |
| 1   | Yes                                                                                               |                                                                                                                                                                |                                                                                                           |   |     |   |    |
| 2   | No                                                                                                |                                                                                                                                                                |                                                                                                           |   |     |   |    |

|     |                                                                               |                                                                               |                                 |
|-----|-------------------------------------------------------------------------------|-------------------------------------------------------------------------------|---------------------------------|
| 215 | medhist_1_14<br>Show the field ONLY if:<br>[covid_1] = "1" OR [covid_1] = "3" | Peptic ulcer disease                                                          | radio (Matrix)<br>1 Yes<br>2 No |
| 216 | medhist_1_15<br>Show the field ONLY if:<br>[covid_1] = "1" OR [covid_1] = "3" | Peripheral vascular disease                                                   | radio (Matrix)<br>1 Yes<br>2 No |
| 217 | medhist_1_16<br>Show the field ONLY if:<br>[covid_1] = "1" OR [covid_1] = "3" | Stroke mini stroke, CVA (cerebrovascular accident) or TIA (transient ischemic | radio (Matrix)<br>1 Yes<br>2 No |
| 218 | medhist_1_17<br>Show the field ONLY if:<br>[covid_1] = "1" OR [covid_1] = "3" | Seizure, fit, convulsion or unexplained loss of consciousness                 | radio (Matrix)<br>1 Yes<br>2 No |
| 219 | medhist_1_18<br>Show the field ONLY if:<br>[covid_1] = "1" OR [covid_1] = "3" | Arthritis                                                                     | radio (Matrix)<br>1 Yes<br>2 No |
| 220 | medhist_1_19<br>Show the field ONLY if:<br>[covid_1] = "1" OR [covid_1] = "3" | Hip Fracture                                                                  | radio (Matrix)<br>1 Yes<br>2 No |
| 221 | medhist_1_20<br>Show the field ONLY if:<br>[covid_1] = "1" OR [covid_1] = "3" | Gout                                                                          | radio (Matrix)<br>1 Yes<br>2 No |
| 222 | medhist_1_21<br>Show the field ONLY if:<br>[covid_1] = "1" OR [covid_1] = "3" | Recreational drug use                                                         | radio (Matrix)<br>1 Yes<br>2 No |
| 223 | medhist_1_22<br>Show the field ONLY if:<br>[covid_1] = "1" OR [covid_1] = "3" | Gaucher disease                                                               | radio (Matrix)<br>1 Yes<br>2 No |
| 224 | medhist_1_23<br>Show the field ONLY if:<br>[covid_1] = "1" OR [covid_1] = "3" | Multiple sclerosis                                                            | radio (Matrix)<br>1 Yes<br>2 No |
| 225 | medhist_1_24<br>Show the field ONLY if:<br>[covid_1] = "1" OR [covid_1] = "3" | B12 deficiency                                                                | radio (Matrix)<br>1 Yes<br>2 No |
| 226 | medhist_1_25<br>Show the field ONLY if:<br>[covid_1] = "1" OR [covid_1] = "3" | Normal pressure hydrocephalus                                                 | radio (Matrix)<br>1 Yes<br>2 No |
| 227 | medhist_1_26<br>Show the field ONLY if:<br>[covid_1] = "1" OR [covid_1] = "3" | Peripheral neuropathy                                                         | radio (Matrix)<br>1 Yes<br>2 No |
| 228 | medhist_1_27<br>Show the field ONLY if:<br>[covid_1] = "1" OR [covid_1] = "3" | Crohn's disease/ Ulcerative colitis                                           | radio (Matrix)<br>1 Yes<br>2 No |
| 229 | medhist_1_28<br>Show the field ONLY if:<br>[covid_1] = "1" OR [covid_1] = "3" | Cancer                                                                        | radio (Matrix)<br>1 Yes<br>2 No |

|     |                                                                                                             |                                                                                                                                                                            |                                 |
|-----|-------------------------------------------------------------------------------------------------------------|----------------------------------------------------------------------------------------------------------------------------------------------------------------------------|---------------------------------|
| 230 | medhist_1_29<br>Show the field ONLY if:<br>[covid_1] = "1" OR [covid_1] = "3"                               | Brain surgery                                                                                                                                                              | radio (Matrix)<br>1 Yes<br>2 No |
| 231 | medhist_1_30<br>Show the field ONLY if:<br>[covid_1] = "1" OR [covid_1] = "3"                               | Other                                                                                                                                                                      | radio (Matrix)<br>1 Yes<br>2 No |
| 232 | medhist_1_29_1<br>Show the field ONLY if:<br>[medhist_1_29] = "1"                                           | If yes to brain surgery, was that DBS? When (age)?                                                                                                                         | text (number)                   |
| 233 | medhist_1_10_2<br>Show the field ONLY if:<br>[medhist_1_10] = "1"                                           | Specify Lung Disease                                                                                                                                                       | text                            |
| 234 | medhist_1_30_1<br>Show the field ONLY if:<br>[medhist_1_30] = "1"                                           | Specify Other                                                                                                                                                              | text                            |
| 235 | meds_1<br>Show the field ONLY if:<br>[dem_7] = "1" AND [covid_1] = "1" OR [dem_7] = "1" AND [covid_1] = "3" | Section Header: III. (If a PD/Parkinsonism patient) PD/Parkinsonism specific questions What medications are you currently taking? (Name, dose, frequency)<br>PD<br>Sinemet | radio<br>1 Yes<br>0 No          |
| 236 | meds_1_1<br>Show the field ONLY if:<br>[meds_1] = "1"                                                       | Dose (mg)<br>(Sinemet)                                                                                                                                                     | text (number)                   |
| 237 | meds_1_2<br>Show the field ONLY if:<br>[meds_1] = "1"                                                       | Frequency (times per day)<br>(Sinemet)                                                                                                                                     | text (number)                   |
| 238 | meds_2<br>Show the field ONLY if:<br>[dem_7] = "1" AND [covid_1] = "1" OR [dem_7] = "1" AND [covid_1] = "3" | Stalevo                                                                                                                                                                    | yesno<br>1 Yes<br>0 No          |
| 239 | meds_2_1<br>Show the field ONLY if:<br>[meds_2] = "1"                                                       | Dose (mg)<br>(Stalevo)                                                                                                                                                     | text (number)                   |
| 240 | meds_2_2<br>Show the field ONLY if:<br>[meds_2] = "1"                                                       | Frequency (times per day)<br>(Stalevo)                                                                                                                                     | text (number)                   |
| 241 | meds_3<br>Show the field ONLY if:<br>[dem_7] = "1" AND [covid_1] = "1" OR [dem_7] = "1" AND [covid_1] = "3" | Mirapex                                                                                                                                                                    | yesno<br>1 Yes<br>0 No          |
| 242 | meds_3_1<br>Show the field ONLY if:<br>[meds_3] = "1"                                                       | Dose (mg)<br>(Mirapex)                                                                                                                                                     | text (number)                   |
| 243 | meds_3_2<br>Show the field ONLY if:<br>[meds_3] = "1"                                                       | Frequency (times per day)<br>(Mirapex)                                                                                                                                     | text (number)                   |
| 244 | meds_4<br>Show the field ONLY if:<br>[dem_7] = "1" AND [covid_1] = "1" OR [dem_7] = "1" AND [covid_1] = "3" | Requip                                                                                                                                                                     | yesno<br>1 Yes<br>0 No          |
| 245 | meds_4_1<br>Show the field ONLY if:<br>[meds_4] = "1"                                                       | Dose (mg)<br>(Requip)                                                                                                                                                      | text (number)                   |



|     |                                                                                                                    |                                                         |                        |
|-----|--------------------------------------------------------------------------------------------------------------------|---------------------------------------------------------|------------------------|
| 246 | meds_4_2<br>Show the field ONLY if:<br>[meds_4] = "1"                                                              | Frequency (times per day)<br>(Requip)                   | text (number)          |
| 247 | meds_5<br>Show the field ONLY if:<br>[dem_7] = "1" AND [covid_1] =<br>"1" OR [dem_7] = "1" AND [cov<br>id_1] = "3" | Amantadine (Symmetrel)                                  | yesno<br>1 Yes<br>0 No |
| 248 | meds_5_1<br>Show the field ONLY if:<br>[meds_5] = "1"                                                              | Dose (mg)<br>(Amantadine [Symmetrel])                   | text (number)          |
| 249 | meds_5_2<br>Show the field ONLY if:<br>[meds_5] = "1"                                                              | Frequency (times per day)<br>(Amantadine [Symmetrel])   | text (number)          |
| 250 | meds_6<br>Show the field ONLY if:<br>[dem_7] = "1" AND [covid_1] =<br>"1" OR [dem_7] = "1" AND [cov<br>id_1] = "3" | Artane (trihexyphenidyl)                                | yesno<br>1 Yes<br>0 No |
| 251 | meds_6_1<br>Show the field ONLY if:<br>[meds_6] = "1"                                                              | Dose (mg)<br>(Artane [trihexyphenidyl])                 | text                   |
| 252 | meds_6_2<br>Show the field ONLY if:<br>[meds_6] = "1"                                                              | Frequency (times per day)<br>(Artane [trihexyphenidyl]) | text                   |
| 253 | meds_7<br>Show the field ONLY if:<br>[dem_7] = "1" AND [covid_1] =<br>"1" OR [dem_7] = "1" AND [cov<br>id_1] = "3" | Azilect (rasagiline)                                    | yesno<br>1 Yes<br>0 No |
| 254 | meds_7_1<br>Show the field ONLY if:<br>[meds_7] = "1"                                                              | Dose (mg)<br>(Azilect [rasagiline])                     | text                   |
| 255 | meds_7_2<br>Show the field ONLY if:<br>[meds_7] = "1"                                                              | Frequency (times per day)<br>(Azilect [rasagiline])     | text                   |
| 256 | meds_8<br>Show the field ONLY if:<br>[dem_7] = "1" AND [covid_1] =<br>"1" OR [dem_7] = "1" AND [cov<br>id_1] = "3" | Comtan (entacapone)                                     | yesno<br>1 Yes<br>0 No |
| 257 | meds_8_1<br>Show the field ONLY if:<br>[meds_8] = "1"                                                              | Dose (mg)<br>(Comtan [entacapone])                      | text (number)          |
| 258 | meds_8_2<br>Show the field ONLY if:<br>[meds_8] = "1"                                                              | Frequency (times per day)<br>(Comtan [entacapone])      | text (number)          |
| 259 | meds_9<br>Show the field ONLY if:<br>[dem_7] = "1" AND [covid_1] =<br>"1" OR [dem_7] = "1" AND [cov<br>id_1] = "3" | Eldepryl (selegiline)                                   | yesno<br>1 Yes<br>0 No |
| 260 | meds_9_1<br>Show the field ONLY if:<br>[meds_9] = "1"                                                              | Dose (mg)<br>(Eldepryl [selegiline])                    | text (number)          |
| 261 | meds_9_2<br>Show the field ONLY if:<br>[meds_9] = "1"                                                              | Frequency (times per day)<br>(Eldepryl [selegiline])    | text (number)          |

|     |                                                                                                               |                                                       |                                                                                                  |   |     |   |    |
|-----|---------------------------------------------------------------------------------------------------------------|-------------------------------------------------------|--------------------------------------------------------------------------------------------------|---|-----|---|----|
| 262 | meds_10<br>Show the field ONLY if:<br>[dem_7] = "1" AND [covid_1] = "1" OR [dem_7] = "1" AND [cov id_1] = "3" | Parcopa                                               | yesno<br><table border="1"><tr><td>1</td><td>Yes</td></tr><tr><td>0</td><td>No</td></tr></table> | 1 | Yes | 0 | No |
| 1   | Yes                                                                                                           |                                                       |                                                                                                  |   |     |   |    |
| 0   | No                                                                                                            |                                                       |                                                                                                  |   |     |   |    |
| 263 | meds_10_1<br>Show the field ONLY if:<br>[meds_10] = "1"                                                       | Dose (mg)<br>(Parcopa)                                | text (number)                                                                                    |   |     |   |    |
| 264 | meds_10_2<br>Show the field ONLY if:<br>[meds_10] = "1"                                                       | Frequency (times per day)<br>(Parcopa)                | text (number)                                                                                    |   |     |   |    |
| 265 | meds_11<br>Show the field ONLY if:<br>[dem_7] = "1" AND [covid_1] = "1" OR [dem_7] = "1" AND [cov id_1] = "3" | Aricept (donepezil)                                   | yesno<br><table border="1"><tr><td>1</td><td>Yes</td></tr><tr><td>0</td><td>No</td></tr></table> | 1 | Yes | 0 | No |
| 1   | Yes                                                                                                           |                                                       |                                                                                                  |   |     |   |    |
| 0   | No                                                                                                            |                                                       |                                                                                                  |   |     |   |    |
| 266 | meds_11_1<br>Show the field ONLY if:<br>[meds_11] = "1"                                                       | Dose (mg)<br>(Aricept [donepezil])                    | text (number)                                                                                    |   |     |   |    |
| 267 | meds_11_2<br>Show the field ONLY if:<br>[meds_11] = "1"                                                       | Frequency (times per day)<br>(Aricept [donepezil])    | text (number)                                                                                    |   |     |   |    |
| 268 | meds_12<br>Show the field ONLY if:<br>[dem_7] = "1" AND [covid_1] = "1" OR [dem_7] = "1" AND [cov id_1] = "3" | Clozaril (clozapine)                                  | yesno<br><table border="1"><tr><td>1</td><td>Yes</td></tr><tr><td>0</td><td>No</td></tr></table> | 1 | Yes | 0 | No |
| 1   | Yes                                                                                                           |                                                       |                                                                                                  |   |     |   |    |
| 0   | No                                                                                                            |                                                       |                                                                                                  |   |     |   |    |
| 269 | meds_12_1<br>Show the field ONLY if:<br>[meds_12] = "1"                                                       | Dose (mg)<br>(Clozaril [clozapine])                   | text (number)                                                                                    |   |     |   |    |
| 270 | meds_12_2<br>Show the field ONLY if:<br>[meds_12] = "1"                                                       | Frequency (times per day)<br>(Clozaril [clozapine])   | text (number)                                                                                    |   |     |   |    |
| 271 | meds_13<br>Show the field ONLY if:<br>[dem_7] = "1" AND [covid_1] = "1" OR [dem_7] = "1" AND [cov id_1] = "3" | Cogentin (benztropine)                                | yesno<br><table border="1"><tr><td>1</td><td>Yes</td></tr><tr><td>0</td><td>No</td></tr></table> | 1 | Yes | 0 | No |
| 1   | Yes                                                                                                           |                                                       |                                                                                                  |   |     |   |    |
| 0   | No                                                                                                            |                                                       |                                                                                                  |   |     |   |    |
| 272 | meds_13_1<br>Show the field ONLY if:<br>[meds_13] = "1"                                                       | Dose (mg)<br>(Cogentin [benztropine])                 | text (number)                                                                                    |   |     |   |    |
| 273 | meds_13_2<br>Show the field ONLY if:<br>[meds_13] = "1"                                                       | Frequency (times per day)<br>(Cogentin [benztropine]) | text                                                                                             |   |     |   |    |
| 274 | meds_14<br>Show the field ONLY if:<br>[dem_7] = "1" AND [covid_1] = "1" OR [dem_7] = "1" AND [cov id_1] = "3" | Klonopin (clonazepam)                                 | yesno<br><table border="1"><tr><td>1</td><td>Yes</td></tr><tr><td>0</td><td>No</td></tr></table> | 1 | Yes | 0 | No |
| 1   | Yes                                                                                                           |                                                       |                                                                                                  |   |     |   |    |
| 0   | No                                                                                                            |                                                       |                                                                                                  |   |     |   |    |
| 275 | meds_14_1<br>Show the field ONLY if:<br>[meds_14] = "1"                                                       | Dose (mg)<br>(Klonopin [clonazepam])                  | text (number)                                                                                    |   |     |   |    |
| 276 | meds_14_2<br>Show the field ONLY if:<br>[meds_14] = "1"                                                       | Frequency (times per day)<br>(Klonopin [clonazepam])  | text (number)                                                                                    |   |     |   |    |

|     |                                                                                                               |                                                               |                                                                                                  |   |     |   |    |
|-----|---------------------------------------------------------------------------------------------------------------|---------------------------------------------------------------|--------------------------------------------------------------------------------------------------|---|-----|---|----|
| 277 | meds_15<br>Show the field ONLY if:<br>[dem_7] = "1" AND [covid_1] = "1" OR [dem_7] = "1" AND [cov id_1] = "3" | Seroquel (quetiapine fumurate)                                | yesno<br><table border="1"><tr><td>1</td><td>Yes</td></tr><tr><td>0</td><td>No</td></tr></table> | 1 | Yes | 0 | No |
| 1   | Yes                                                                                                           |                                                               |                                                                                                  |   |     |   |    |
| 0   | No                                                                                                            |                                                               |                                                                                                  |   |     |   |    |
| 278 | meds_15_1<br>Show the field ONLY if:<br>[meds_15] = "1"                                                       | Dose (mg)<br>(Seroquel [quetiapine fumurate])                 | text (number)                                                                                    |   |     |   |    |
| 279 | meds_15_2<br>Show the field ONLY if:<br>[meds_15] = "1"                                                       | Frequency (times per day)<br>(Seroquel [quetiapine fumurate]) | text (number)                                                                                    |   |     |   |    |
| 280 | meds_16<br>Show the field ONLY if:<br>[dem_7] = "1" AND [covid_1] = "1" OR [dem_7] = "1" AND [cov id_1] = "3" | Valium (lorazepam)                                            | yesno<br><table border="1"><tr><td>1</td><td>Yes</td></tr><tr><td>0</td><td>No</td></tr></table> | 1 | Yes | 0 | No |
| 1   | Yes                                                                                                           |                                                               |                                                                                                  |   |     |   |    |
| 0   | No                                                                                                            |                                                               |                                                                                                  |   |     |   |    |
| 281 | meds_16_1<br>Show the field ONLY if:<br>[meds_16] = "1"                                                       | Dose (mg)<br>(Valium [lorazepam])                             | text (number)                                                                                    |   |     |   |    |
| 282 | meds_16_2<br>Show the field ONLY if:<br>[meds_16] = "1"                                                       | Frequency (times per day)<br>(Valium [lorazepam])             | text (number)                                                                                    |   |     |   |    |
| 283 | meds_17<br>Show the field ONLY if:<br>[dem_7] = "1" AND [covid_1] = "1" OR [dem_7] = "1" AND [cov id_1] = "3" | Neupro (rotigotine)                                           | yesno<br><table border="1"><tr><td>1</td><td>Yes</td></tr><tr><td>0</td><td>No</td></tr></table> | 1 | Yes | 0 | No |
| 1   | Yes                                                                                                           |                                                               |                                                                                                  |   |     |   |    |
| 0   | No                                                                                                            |                                                               |                                                                                                  |   |     |   |    |
| 284 | meds_17_1<br>Show the field ONLY if:<br>[meds_17] = "1"                                                       | Dose (mg)<br>(Neupro [rotigotine])                            | text (number)                                                                                    |   |     |   |    |
| 285 | meds_17_2<br>Show the field ONLY if:<br>[meds_17] = "1"                                                       | Frequency (times per day)<br>(Neupro [rotigotine])            | text (number)                                                                                    |   |     |   |    |
| 286 | meds_18<br>Show the field ONLY if:<br>[dem_7] = "1" AND [covid_1] = "1" OR [dem_7] = "1" AND [cov id_1] = "3" | Rytary                                                        | yesno<br><table border="1"><tr><td>1</td><td>Yes</td></tr><tr><td>0</td><td>No</td></tr></table> | 1 | Yes | 0 | No |
| 1   | Yes                                                                                                           |                                                               |                                                                                                  |   |     |   |    |
| 0   | No                                                                                                            |                                                               |                                                                                                  |   |     |   |    |
| 287 | meds_18_1<br>Show the field ONLY if:<br>[meds_18] = "1"                                                       | Dose (mg)<br>(Rytary)                                         | text (number)                                                                                    |   |     |   |    |
| 288 | meds_18_2<br>Show the field ONLY if:<br>[meds_18] = "1"                                                       | Frequency (times per day)<br>(Rytary)                         | text (number)                                                                                    |   |     |   |    |
| 289 | meds_19<br>Show the field ONLY if:<br>[dem_7] = "1" AND [covid_1] = "1" OR [dem_7] = "1" AND [cov id_1] = "3" | Duopa                                                         | yesno<br><table border="1"><tr><td>1</td><td>Yes</td></tr><tr><td>0</td><td>No</td></tr></table> | 1 | Yes | 0 | No |
| 1   | Yes                                                                                                           |                                                               |                                                                                                  |   |     |   |    |
| 0   | No                                                                                                            |                                                               |                                                                                                  |   |     |   |    |
| 290 | meds_19_1<br>Show the field ONLY if:<br>[meds_19] = "1"                                                       | Dose (mg)<br>(Duopa)                                          | text (number)                                                                                    |   |     |   |    |
| 291 | meds_19_2<br>Show the field ONLY if:<br>[meds_19] = "1"                                                       | Frequency (times per day)<br>(Duopa)                          | text (number)                                                                                    |   |     |   |    |

|     |                                                                                                               |                                                                                                   |                                                                                                  |   |     |   |    |
|-----|---------------------------------------------------------------------------------------------------------------|---------------------------------------------------------------------------------------------------|--------------------------------------------------------------------------------------------------|---|-----|---|----|
| 292 | meds_20<br>Show the field ONLY if:<br>[dem_7] = "1" AND [covid_1] = "1" OR [dem_7] = "1" AND [cov id_1] = "3" | Other PD meds                                                                                     | yesno<br><table border="1"><tr><td>1</td><td>Yes</td></tr><tr><td>0</td><td>No</td></tr></table> | 1 | Yes | 0 | No |
| 1   | Yes                                                                                                           |                                                                                                   |                                                                                                  |   |     |   |    |
| 0   | No                                                                                                            |                                                                                                   |                                                                                                  |   |     |   |    |
| 293 | meds_20_1<br>Show the field ONLY if:<br>[meds_20] = "1"                                                       | Other PD meds                                                                                     | text                                                                                             |   |     |   |    |
| 294 | meds_20_2<br>Show the field ONLY if:<br>[meds_20] = "1"                                                       | Dose (mg)<br>(Other PD meds)                                                                      | text (number)                                                                                    |   |     |   |    |
| 295 | meds_20_3<br>Show the field ONLY if:<br>[meds_20] = "1"                                                       | Frequency (times per day)<br>(Other PD meds)                                                      | text (number)                                                                                    |   |     |   |    |
| 296 | meds_21<br>Show the field ONLY if:<br>[dem_7] = "1" AND [covid_1] = "1" OR [dem_7] = "1" AND [cov id_1] = "3" | OTHER MEDICATIONS<br>Antidepressants<br><br>Celexa, Lexapro, Luvox, Paxil, Prozac Serzone, Zoloft | yesno<br><table border="1"><tr><td>1</td><td>Yes</td></tr><tr><td>0</td><td>No</td></tr></table> | 1 | Yes | 0 | No |
| 1   | Yes                                                                                                           |                                                                                                   |                                                                                                  |   |     |   |    |
| 0   | No                                                                                                            |                                                                                                   |                                                                                                  |   |     |   |    |
| 297 | meds_21_1<br>Show the field ONLY if:<br>[meds_21] = "1"                                                       | Celexa, Lexapro, Luvox, Paxil, Prozac Serzone, Zoloft                                             | text                                                                                             |   |     |   |    |
| 298 | meds_21_2<br>Show the field ONLY if:<br>[meds_21] = "1"                                                       | Dose (mg)<br>(Celexa, Lexapro, Luvox, Paxil, Prozac Serzone, Zoloft)                              | text (number)                                                                                    |   |     |   |    |
| 299 | meds_21_3<br>Show the field ONLY if:<br>[meds_21] = "1"                                                       | Frequency (times per day)<br>(Celexa, Lexapro, Luvox, Paxil, Prozac Serzone, Zoloft)              | text (number)                                                                                    |   |     |   |    |
| 300 | meds_22<br>Show the field ONLY if:<br>[dem_7] = "1" AND [covid_1] = "1" OR [dem_7] = "1" AND [cov id_1] = "3" | Wellbutrin                                                                                        | yesno<br><table border="1"><tr><td>1</td><td>Yes</td></tr><tr><td>0</td><td>No</td></tr></table> | 1 | Yes | 0 | No |
| 1   | Yes                                                                                                           |                                                                                                   |                                                                                                  |   |     |   |    |
| 0   | No                                                                                                            |                                                                                                   |                                                                                                  |   |     |   |    |
| 301 | meds_22_1<br>Show the field ONLY if:<br>[meds_22] = "1"                                                       | Dose (mg)<br>(Wellbutrin)                                                                         | text (number)                                                                                    |   |     |   |    |
| 302 | meds_22_2<br>Show the field ONLY if:<br>[meds_22] = "1"                                                       | Frequency (times per day)<br>(Wellbutrin)                                                         | text (number)                                                                                    |   |     |   |    |
| 303 | meds_23<br>Show the field ONLY if:<br>[dem_7] = "1" AND [covid_1] = "1" OR [dem_7] = "1" AND [cov id_1] = "3" | Effexor                                                                                           | yesno<br><table border="1"><tr><td>1</td><td>Yes</td></tr><tr><td>0</td><td>No</td></tr></table> | 1 | Yes | 0 | No |
| 1   | Yes                                                                                                           |                                                                                                   |                                                                                                  |   |     |   |    |
| 0   | No                                                                                                            |                                                                                                   |                                                                                                  |   |     |   |    |
| 304 | meds_23_1<br>Show the field ONLY if:<br>[meds_23] = "1"                                                       | Dose (mg)<br>(Effexor)                                                                            | text (number)                                                                                    |   |     |   |    |
| 305 | meds_23_2<br>Show the field ONLY if:<br>[meds_23] = "1"                                                       | Frequency (times per day)<br>(Effexor)                                                            | text (number)                                                                                    |   |     |   |    |
| 306 | meds_24<br>Show the field ONLY if:<br>[dem_7] = "1" AND [covid_1] = "1" OR [dem_7] = "1" AND [cov id_1] = "3" | Cymbalta                                                                                          | yesno<br><table border="1"><tr><td>1</td><td>Yes</td></tr><tr><td>0</td><td>No</td></tr></table> | 1 | Yes | 0 | No |
| 1   | Yes                                                                                                           |                                                                                                   |                                                                                                  |   |     |   |    |
| 0   | No                                                                                                            |                                                                                                   |                                                                                                  |   |     |   |    |

|     |                                                                                                                     |                                                                                                                                                                                                                                                                     |                        |
|-----|---------------------------------------------------------------------------------------------------------------------|---------------------------------------------------------------------------------------------------------------------------------------------------------------------------------------------------------------------------------------------------------------------|------------------------|
| 307 | meds_24_1<br>Show the field ONLY if:<br>[meds_24] = "1"                                                             | Dose (mg)<br><br>(Cymbalta)                                                                                                                                                                                                                                         | text (number)          |
| 308 | meds_24_2<br>Show the field ONLY if:<br>[meds_24] = "1"                                                             | Frequency (times per day)<br><br>(Cymbalta)                                                                                                                                                                                                                         | text (number)          |
| 309 | meds_25<br>Show the field ONLY if:<br>[dem_7] = "1" AND [covid_1] =<br>"1" OR [dem_7] = "1" AND [cov<br>id_1] = "3" | MAO inhibitor (Parnate, Nardil, Marplan)                                                                                                                                                                                                                            | yesno<br>1 Yes<br>0 No |
| 310 | meds_25_1<br>Show the field ONLY if:<br>[meds_25] = "1"                                                             | MAO inhibitor (Parnate, Nardil, Marplan)                                                                                                                                                                                                                            | text                   |
| 311 | meds_25_2<br>Show the field ONLY if:<br>[meds_25] = "1"                                                             | Dose (mg)<br><br>(MAO inhibitor [Parnate, Nardil, Marplan])                                                                                                                                                                                                         | text (number)          |
| 312 | meds_25_3<br>Show the field ONLY if:<br>[meds_25] = "1"                                                             | Frequency (times per day)<br><br>(MAO inhibitor [Parnate, Nardil, Marplan])                                                                                                                                                                                         | text (number)          |
| 313 | meds_26<br>Show the field ONLY if:<br>[dem_7] = "1" AND [covid_1] =<br>"1" OR [dem_7] = "1" AND [cov<br>id_1] = "3" | Amitriptyline (Elavil, Vanatrip), Clomipramine<br>(Anafranil), Desipramine (Norpramin), Doxepin<br>(Sinequan), Imipramine (Tofranil),<br>Nortriptyline (Aventyl, Pamelor), Protryptiline<br>(Vivactil), Trimipramine (Surmontil)                                    | yesno<br>1 Yes<br>0 No |
| 314 | meds_26_1<br>Show the field ONLY if:<br>[meds_26] = "1"                                                             | Amitriptyline (Elavil, Vanatrip), Clomipramine<br>(Anafranil), Desipramine (Norpramin), Doxepin<br>(Sinequan), Imipramine (Tofranil),<br>Nortriptyline (Aventyl, Pamelor), Protryptiline<br>(Vivactil), Trimipramine (Surmontil)                                    | text                   |
| 315 | meds_26_2<br>Show the field ONLY if:<br>[meds_26] = "1"                                                             | Dose (mg)<br><br>[Amitriptyline (Elavil, Vanatrip), Clomipramine<br>(Anafranil), Desipramine (Norpramin), Doxepin<br>(Sinequan), Imipramine (Tofranil),<br>Nortriptyline (Aventyl, Pamelor), Protryptiline<br>(Vivactil), Trimipramine (Surmontil)]                 | text (number)          |
| 316 | meds_26_3<br>Show the field ONLY if:<br>[meds_26] = "1"                                                             | Frequency (times per day)<br><br>[Amitriptyline (Elavil, Vanatrip), Clomipramine<br>(Anafranil), Desipramine (Norpramin), Doxepin<br>(Sinequan), Imipramine (Tofranil),<br>Nortriptyline (Aventyl, Pamelor), Protryptiline<br>(Vivactil), Trimipramine (Surmontil)] | text (number)          |
| 317 | meds_27<br>Show the field ONLY if:<br>[dem_7] = "1" AND [covid_1] =<br>"1" OR [dem_7] = "1" AND [cov<br>id_1] = "3" | Neuroleptics/antipsychotics<br><br>Chlorpromazine (Thorazine), Fluphenazine<br>(Prolixin),<br>Haloperidol (Haldol), Thiothixene (Navane),<br>Trifluoperazine (Stelazine), Perphenazine<br>(Trilafon), and Thioridazine (Mellaril)                                   | yesno<br>1 Yes<br>0 No |
| 318 | meds_27_1<br>Show the field ONLY if:<br>[meds_27] = "1"                                                             | Chlorpromazine (Thorazine), Fluphenazine<br>(Prolixin),<br>Haloperidol (Haldol), Thiothixene (Navane),<br>Trifluoperazine (Stelazine), Perphenazine<br>(Trilafon), and Thioridazine (Mellaril)                                                                      | text                   |

|     |                                                                                                               |                                                                                                                                                                                                                       |                        |
|-----|---------------------------------------------------------------------------------------------------------------|-----------------------------------------------------------------------------------------------------------------------------------------------------------------------------------------------------------------------|------------------------|
| 319 | meds_27_2<br>Show the field ONLY if:<br>[meds_27] = "1"                                                       | Dose (mg)<br><br>[Chlorpromazine (Thorazine), Fluphenazine (Prolixin), Haloperidol (Haldol), Thiothixene (Navane), Trifluoperazine (Stelazine), Perphenazine (Trilafon), and Thioridazine (Mellaril)]                 | text (number)          |
| 320 | meds_27_3<br>Show the field ONLY if:<br>[meds_27] = "1"                                                       | Frequency (times per day)<br><br>[Chlorpromazine (Thorazine), Fluphenazine (Prolixin), Haloperidol (Haldol), Thiothixene (Navane), Trifluoperazine (Stelazine), Perphenazine (Trilafon), and Thioridazine (Mellaril)] | text (number)          |
| 321 | meds_28<br>Show the field ONLY if:<br>[dem_7] = "1" AND [covid_1] = "1" OR [dem_7] = "1" AND [cov id_1] = "3" | Aripiprazole (Abilify), Risperidone (Risperdal), Olanzapine (Zyprexa), and Ziprasidone (Geodon)                                                                                                                       | yesno<br>1 Yes<br>0 No |
| 322 | meds_28_1<br>Show the field ONLY if:<br>[meds_28] = "1"                                                       | Aripiprazole (Abilify), Risperidone (Risperdal), Olanzapine (Zyprexa), and Ziprasidone (Geodon)                                                                                                                       | text                   |
| 323 | meds_28_2<br>Show the field ONLY if:<br>[meds_28] = "1"                                                       | Dose (mg)<br><br>[Aripiprazole (Abilify), Risperidone (Risperdal), Olanzapine (Zyprexa), and Ziprasidone (Geodon)]                                                                                                    | text (number)          |
| 324 | meds_28_3<br>Show the field ONLY if:<br>[meds_28] = "1"                                                       | Frequency (times per day)<br><br>[Aripiprazole (Abilify), Risperidone (Risperdal), Olanzapine (Zyprexa), and Ziprasidone (Geodon)]                                                                                    | text (number)          |
| 325 | meds_29<br>Show the field ONLY if:<br>[dem_7] = "1" AND [covid_1] = "1" OR [dem_7] = "1" AND [cov id_1] = "3" | Clozapine (Clozaril), Quetiapine (Seroquel)                                                                                                                                                                           | yesno<br>1 Yes<br>0 No |
| 326 | meds_29_1<br>Show the field ONLY if:<br>[meds_29] = "1"                                                       | Clozapine (Clozaril), Quetiapine (Seroquel)                                                                                                                                                                           | text                   |
| 327 | meds_29_2<br>Show the field ONLY if:<br>[meds_29] = "1"                                                       | Dose (mg)<br><br>[Clozapine (Clozaril), Quetiapine (Seroquel)]                                                                                                                                                        | text (number)          |
| 328 | meds_29_3<br>Show the field ONLY if:<br>[meds_29] = "1"                                                       | Frequency (times per day)<br><br>[Clozapine (Clozaril), Quetiapine (Seroquel)]                                                                                                                                        | text (number)          |
| 329 | meds_30<br>Show the field ONLY if:<br>[dem_7] = "1" AND [covid_1] = "1" OR [dem_7] = "1" AND [cov id_1] = "3" | Aspirin or NSAIDS<br><br>Aspirin, Ecotrin, Excedrin, Anacin                                                                                                                                                           | yesno<br>1 Yes<br>0 No |
| 330 | meds_30_1<br>Show the field ONLY if:<br>[meds_30] = "1"                                                       | Aspirin, Ecotrin, Excedrin, Anacin                                                                                                                                                                                    | text                   |

|     |                                                                                                                     |                                                                                                                                           |                        |
|-----|---------------------------------------------------------------------------------------------------------------------|-------------------------------------------------------------------------------------------------------------------------------------------|------------------------|
| 331 | meds_30_2<br>Show the field ONLY if:<br>[meds_30] = "1"                                                             | Dose (mg)<br>(Aspirin, Ecotrin, Excedrin, Anacin)                                                                                         | text (number)          |
| 332 | meds_30_3<br>Show the field ONLY if:<br>[meds_30] = "1"                                                             | Frequency (times per day)<br>(Aspirin, Ecotrin, Excedrin, Anacin)                                                                         | text (number)          |
| 333 | meds_31<br>Show the field ONLY if:<br>[dem_7] = "1" AND [covid_1] =<br>"1" OR [dem_7] = "1" AND [cov<br>id_1] = "3" | Orudis, Ketoprofen, Oruvail, Ansaid, Naprosyn,<br>Anaprox, Naproxen, Naprolan, Aleve, Daypro<br>or Toradol                                | yesno<br>1 Yes<br>0 No |
| 334 | meds_31_1<br>Show the field ONLY if:<br>[meds_31] = "1"                                                             | Orudis, Ketoprofen, Oruvail, Ansaid, Naprosyn,<br>Anaprox, Naproxen, Naprolan, Aleve, Daypro<br>or Toradol                                | text                   |
| 335 | meds_31_2<br>Show the field ONLY if:<br>[meds_31] = "1"                                                             | Dose (mg)<br>(Orudis, Ketoprofen, Oruvail, Ansaid, Naprosyn,<br>Anaprox, Naproxen, Naprolan, Aleve, Daypro<br>or Toradol)                 | text (number)          |
| 336 | meds_31_3<br>Show the field ONLY if:<br>[meds_31] = "1"                                                             | Frequency (times per day)<br>(Orudis, Ketoprofen, Oruvail, Ansaid, Naprosyn,<br>Anaprox, Naproxen, Naprolan, Aleve, Daypro<br>or Toradol) | text (number)          |
| 337 | meds_32<br>Show the field ONLY if:<br>[dem_7] = "1" AND [covid_1] =<br>"1" OR [dem_7] = "1" AND [cov<br>id_1] = "3" | Indocin, Indomethacin, Clinoril, Sulindac,<br>Lodine, Voltaren, Cataflam or Diclofenac                                                    | yesno<br>1 Yes<br>0 No |
| 338 | meds_32_1<br>Show the field ONLY if:<br>[meds_32] = "1"                                                             | Indocin, Indomethacin, Clinoril, Sulindac,<br>Lodine, Voltaren, Cataflam or Diclofenac                                                    | text                   |
| 339 | meds_32_2<br>Show the field ONLY if:<br>[meds_32] = "1"                                                             | Dose (mg)<br>(Indocin, Indomethacin, Clinoril, Sulindac,<br>Lodine, Voltaren, Cataflam or Diclofenac)                                     | text (number)          |
| 340 | meds_32_3<br>Show the field ONLY if:<br>[meds_32] = "1"                                                             | Frequency (times per day)<br>(Indocin, Indomethacin, Clinoril, Sulindac,<br>Lodine, Voltaren, Cataflam or Diclofenac)                     | text (number)          |
| 341 | meds_33<br>Show the field ONLY if:<br>[dem_7] = "1" AND [covid_1] =<br>"1" OR [dem_7] = "1" AND [cov<br>id_1] = "3" | Celebrex, Vioxx, Bextra or Relafen                                                                                                        | yesno<br>1 Yes<br>0 No |
| 342 | meds_33_1<br>Show the field ONLY if:<br>[meds_33] = "1"                                                             | Celebrex, Vioxx, Bextra or Relafen                                                                                                        | text                   |
| 343 | meds_33_2<br>Show the field ONLY if:<br>[meds_33] = "1"                                                             | Dose (mg)<br>(Celebrex, Vioxx, Bextra or Relafen)                                                                                         | text (number)          |

|     |                                                                                                                     |                                                                                                 |                        |
|-----|---------------------------------------------------------------------------------------------------------------------|-------------------------------------------------------------------------------------------------|------------------------|
| 344 | meds_33_3<br>Show the field ONLY if:<br>[meds_33] = "1"                                                             | Frequency (times per day)<br>(Celebrex, Vioxx, Bextra or Relafen)                               | text (number)          |
| 345 | meds_34<br>Show the field ONLY if:<br>[dem_7] = "1" AND [covid_1] =<br>"1" OR [dem_7] = "1" AND [cov<br>id_1] = "3" | Statins<br>Lipitor, Zocor, Pravachol, Lescol, Crestor,<br>Mevacor (--statin)                    | yesno<br>1 Yes<br>0 No |
| 346 | meds_34_1<br>Show the field ONLY if:<br>[meds_34] = "1"                                                             | Lipitor, Zocor, Pravachol, Lescol, Crestor,<br>Mevacor (--statin)                               | text                   |
| 347 | meds_34_2<br>Show the field ONLY if:<br>[meds_34] = "1"                                                             | Dose (mg)<br>Lipitor, Zocor, Pravachol, Lescol, Crestor,<br>Mevacor (--statin))                 | text (number)          |
| 348 | meds_34_3<br>Show the field ONLY if:<br>[meds_34] = "1"                                                             | Frequency (times per day)<br>Lipitor, Zocor, Pravachol, Lescol, Crestor,<br>Mevacor (--statin)) | text (number)          |
| 349 | meds_35<br>Show the field ONLY if:<br>[dem_7] = "1" AND [covid_1] =<br>"1" OR [dem_7] = "1" AND [cov<br>id_1] = "3" | Other<br>SUPPLEMENTS<br>Ginko Biloba                                                            | yesno<br>1 Yes<br>0 No |
| 350 | meds_35_1<br>Show the field ONLY if:<br>[meds_35] = "1"                                                             | Dose (specify unit of measurement)<br>(Ginko Biloba)                                            | text                   |
| 351 | meds_35_2<br>Show the field ONLY if:<br>[meds_35] = "1"                                                             | Frequency (specify times per day/week/month)<br>(Ginko Biloba)                                  | text                   |
| 352 | meds_36<br>Show the field ONLY if:<br>[dem_7] = "1" AND [covid_1] =<br>"1" OR [dem_7] = "1" AND [cov<br>id_1] = "3" | Coenzyme Q10                                                                                    | yesno<br>1 Yes<br>0 No |
| 353 | meds_36_1<br>Show the field ONLY if:<br>[meds_36] = "1"                                                             | Dose (specify unit of measurement)<br>(Coenzyme Q10)                                            | text                   |
| 354 | meds_36_2<br>Show the field ONLY if:<br>[meds_36] = "1"                                                             | Frequency (specify times per day/week/month)<br>(Coenzyme Q10)                                  | text                   |



|     |                                                                                                               |                                                                                                                                           |                        |
|-----|---------------------------------------------------------------------------------------------------------------|-------------------------------------------------------------------------------------------------------------------------------------------|------------------------|
| 355 | meds_37<br>Show the field ONLY if:<br>[dem_7] = "1" AND [covid_1] = "1" OR [dem_7] = "1" AND [cov id_1] = "3" | Mutivitamin (such as One-a-day, stress tabs, theragram, centrum, generic multivitamins)                                                   | yesno<br>1 Yes<br>0 No |
| 356 | meds_37_1<br>Show the field ONLY if:<br>[meds_37] = "1"                                                       | Mutivitamin (such as One-a-day, stress tabs, theragram, centrum, generic multivitamins)                                                   | text                   |
| 357 | meds_37_2<br>Show the field ONLY if:<br>[meds_37] = "1"                                                       | Dose (specify unit of measurement)<br>[Mutivitamin (such as One-a-day, stress tabs, theragram, centrum, generic multivitamins)]           | text                   |
| 358 | meds_37_3<br>Show the field ONLY if:<br>[meds_37] = "1"                                                       | Frequency (specify times per day/week/month)<br>[Mutivitamin (such as One-a-day, stress tabs, theragram, centrum, generic multivitamins)] | text                   |
| 359 | meds_38<br>Show the field ONLY if:<br>[dem_7] = "1" AND [covid_1] = "1" OR [dem_7] = "1" AND [cov id_1] = "3" | Vitamin C                                                                                                                                 | yesno<br>1 Yes<br>0 No |
| 360 | meds_38_1<br>Show the field ONLY if:<br>[meds_38] = "1"                                                       | Dose (specify unit of measurement)<br>(Vitamin C)                                                                                         | text                   |
| 361 | meds_38_2<br>Show the field ONLY if:<br>[meds_38] = "1"                                                       | Frequency (specify times per day/week/month)<br>(Vitamin C)                                                                               | text                   |
| 362 | meds_39<br>Show the field ONLY if:<br>[dem_7] = "1" AND [covid_1] = "1" OR [dem_7] = "1" AND [cov id_1] = "3" | Vitamin E                                                                                                                                 | yesno<br>1 Yes<br>0 No |
| 363 | meds_39_1<br>Show the field ONLY if:<br>[meds_39] = "1"                                                       | Dose (specify unit of measurement)<br>(Vitamin E)                                                                                         | text                   |
| 364 | meds_39_2<br>Show the field ONLY if:<br>[meds_39] = "1"                                                       | Frequency (specify times per day/week/month)<br>(Vitamin E)                                                                               | text                   |
| 365 | meds_40<br>Show the field ONLY if:<br>[dem_7] = "1" AND [covid_1] = "1" OR [dem_7] = "1" AND [cov id_1] = "3" | B Complex                                                                                                                                 | yesno<br>1 Yes<br>0 No |
| 366 | meds_40_1<br>Show the field ONLY if:<br>[meds_40] = "1"                                                       | Dose (specify unit of measurement)<br>(B Complex)                                                                                         | text                   |

|     |                                                                                                                     |                                                             |                        |
|-----|---------------------------------------------------------------------------------------------------------------------|-------------------------------------------------------------|------------------------|
| 367 | meds_40_2<br>Show the field ONLY if:<br>[meds_40] = "1"                                                             | Frequency (specify times per day/week/month)<br>(B Complex) | text                   |
| 368 | meds_41<br>Show the field ONLY if:<br>[dem_7] = "1" AND [covid_1] =<br>"1" OR [dem_7] = "1" AND [cov<br>id_1] = "3" | Zinc                                                        | yesno<br>1 Yes<br>0 No |
| 369 | meds_41_1<br>Show the field ONLY if:<br>[meds_41] = "1"                                                             | Dose (specify unit of measurement)<br>(Zinc)                | text                   |
| 370 | meds_41_2<br>Show the field ONLY if:<br>[meds_41] = "1"                                                             | Frequency (specify times per day/week/month)<br>(Zinc)      | text                   |
| 371 | meds_42<br>Show the field ONLY if:<br>[dem_7] = "1" AND [covid_1] =<br>"1" OR [dem_7] = "1" AND [cov<br>id_1] = "3" | Other I.                                                    | yesno<br>1 Yes<br>0 No |
| 372 | meds_42_1<br>Show the field ONLY if:<br>[meds_42] = "1"                                                             | Other I.                                                    | text                   |
| 373 | meds_42_2<br>Show the field ONLY if:<br>[meds_42] = "1"                                                             | Dose (specify unit of measurement)<br>(Other I.)            | text                   |
| 374 | meds_42_3<br>Show the field ONLY if:<br>[meds_42] = "1"                                                             | Frequency (specify times per day/week/month)<br>(Other I.)  | text                   |
| 375 | meds_43<br>Show the field ONLY if:<br>[dem_7] = "1" AND [covid_1] =<br>"1" OR [dem_7] = "1" AND [cov<br>id_1] = "3" | Other II.                                                   | yesno<br>1 Yes<br>0 No |
| 376 | meds_43_1<br>Show the field ONLY if:<br>[meds_43] = "1"                                                             | Other II.                                                   | text                   |
| 377 | meds_43_2<br>Show the field ONLY if:<br>[meds_43] = "1"                                                             | Dose (specify unit of measurement)<br>(Other II.)           | text                   |
| 378 | meds_43_3<br>Show the field ONLY if:<br>[meds_43] = "1"                                                             | Frequency (specify times per day/week/month)<br>(Other II.) | text                   |
| 379 | meds_44<br>Show the field ONLY if:<br>[dem_7] = "1" AND [covid_1] =<br>"1" OR [dem_7] = "1" AND [cov<br>id_1] = "3" | Other III.                                                  | yesno<br>1 Yes<br>0 No |
| 380 | meds_44_1<br>Show the field ONLY if:<br>[meds_44] = "1"                                                             | Other III.                                                  | text                   |

|     |                                                                                                                     |                                                              |                        |
|-----|---------------------------------------------------------------------------------------------------------------------|--------------------------------------------------------------|------------------------|
| 381 | meds_44_2<br>Show the field ONLY if:<br>[meds_44] = "1"                                                             | Dose (specify unit of measurement)<br>(Other III.)           | text                   |
| 382 | meds_44_3<br>Show the field ONLY if:<br>[meds_44] = "1"                                                             | Frequency (specify times per day/week/month)<br>(Other III.) | text                   |
| 383 | meds_45<br>Show the field ONLY if:<br>[dem_7] = "1" AND [covid_1] =<br>"1" OR [dem_7] = "1" AND [cov<br>id_1] = "3" | Other IV.                                                    | yesno<br>1 Yes<br>0 No |
| 384 | meds_45_1<br>Show the field ONLY if:<br>[meds_45] = "1"                                                             | Other IV.                                                    | text                   |
| 385 | meds_45_2<br>Show the field ONLY if:<br>[meds_45] = "1"                                                             | Dose (specify unit of measurement)<br>(Other IV.)            | text                   |
| 386 | meds_45_3<br>Show the field ONLY if:<br>[meds_45] = "1"                                                             | Frequency (specify times per day/week/month)<br>(Other IV.)  | text                   |
| 387 | meds_46<br>Show the field ONLY if:<br>[dem_7] = "1" AND [covid_1] =<br>"1" OR [dem_7] = "1" AND [cov<br>id_1] = "3" | Other V.                                                     | yesno<br>1 Yes<br>0 No |
| 388 | meds_46_1<br>Show the field ONLY if:<br>[meds_46] = "1"                                                             | Other V.                                                     | text                   |
| 389 | meds_46_2<br>Show the field ONLY if:<br>[meds_46] = "1"                                                             | Dose (specify unit of measurement)<br>(Other V.)             | text                   |
| 390 | meds_46_3<br>Show the field ONLY if:<br>[meds_46] = "1"                                                             | Frequency (specify times per day/week/month)<br>(Other V.)   | text                   |
| 391 | meds_47<br>Show the field ONLY if:<br>[dem_7] = "1" AND [covid_1] =<br>"1" OR [dem_7] = "1" AND [cov<br>id_1] = "3" | Other VI.                                                    | yesno<br>1 Yes<br>0 No |
| 392 | meds_47_1<br>Show the field ONLY if:<br>[meds_47] = "1"                                                             | Other VI.                                                    | text                   |
| 393 | meds_47_2<br>Show the field ONLY if:<br>[meds_47] = "1"                                                             | Dose (specify unit of measurement)<br>(Other VI.)            | text                   |
| 394 | meds_47_3<br>Show the field ONLY if:<br>[meds_47] = "1"                                                             | Frequency (specify times per day/week/month)<br>(Other VI.)  | text                   |
| 395 | meds_48<br>Show the field ONLY if:<br>[dem_7] = "1" AND [covid_1] =<br>"1" OR [dem_7] = "1" AND [cov<br>id_1] = "3" | Other VII.                                                   | yesno<br>1 Yes<br>0 No |
| 396 | meds_48_1<br>Show the field ONLY if:<br>[meds_48] = "1"                                                             | Other VII.                                                   | text                   |

|     |                                                                                                                                    |                                                                                                                                                              |                                                                                                                                                                                                                                                                                                                                                                                           |   |                 |   |                                                    |   |                                     |   |                                   |   |                                     |
|-----|------------------------------------------------------------------------------------------------------------------------------------|--------------------------------------------------------------------------------------------------------------------------------------------------------------|-------------------------------------------------------------------------------------------------------------------------------------------------------------------------------------------------------------------------------------------------------------------------------------------------------------------------------------------------------------------------------------------|---|-----------------|---|----------------------------------------------------|---|-------------------------------------|---|-----------------------------------|---|-------------------------------------|
| 397 | <p>meds_48_2</p> <p>Show the field ONLY if:<br/>[meds_48] = "1"</p>                                                                | <p>Dose (specify unit of measurement)</p> <p>(Other VII.)</p>                                                                                                | text                                                                                                                                                                                                                                                                                                                                                                                      |   |                 |   |                                                    |   |                                     |   |                                   |   |                                     |
| 398 | <p>meds_48_3</p> <p>Show the field ONLY if:<br/>[meds_48] = "1"</p>                                                                | <p>Frequency (specify times per day/week/month)</p> <p>(Other VII.)</p>                                                                                      | text                                                                                                                                                                                                                                                                                                                                                                                      |   |                 |   |                                                    |   |                                     |   |                                   |   |                                     |
| 399 | <p>meds_49</p> <p>Show the field ONLY if:<br/>[dem_7] = "1" AND [covid_1] = "1" OR [dem_7] = "1" AND [cov id_1] = "3"</p>          | Other VIII.                                                                                                                                                  | <p>yesno</p> <table border="1"> <tr> <td>1</td> <td>Yes</td> </tr> <tr> <td>0</td> <td>No</td> </tr> </table>                                                                                                                                                                                                                                                                             | 1 | Yes             | 0 | No                                                 |   |                                     |   |                                   |   |                                     |
| 1   | Yes                                                                                                                                |                                                                                                                                                              |                                                                                                                                                                                                                                                                                                                                                                                           |   |                 |   |                                                    |   |                                     |   |                                   |   |                                     |
| 0   | No                                                                                                                                 |                                                                                                                                                              |                                                                                                                                                                                                                                                                                                                                                                                           |   |                 |   |                                                    |   |                                     |   |                                   |   |                                     |
| 400 | <p>meds_49_1</p> <p>Show the field ONLY if:<br/>[meds_49] = "1"</p>                                                                | Other VIII.                                                                                                                                                  | text                                                                                                                                                                                                                                                                                                                                                                                      |   |                 |   |                                                    |   |                                     |   |                                   |   |                                     |
| 401 | <p>meds_49_2</p> <p>Show the field ONLY if:<br/>[meds_49] = "1"</p>                                                                | <p>Dose (specify unit of measurement)</p> <p>(Other VIII.)</p>                                                                                               | text                                                                                                                                                                                                                                                                                                                                                                                      |   |                 |   |                                                    |   |                                     |   |                                   |   |                                     |
| 402 | <p>meds_49_3</p> <p>Show the field ONLY if:<br/>[meds_49] = "1"</p>                                                                | <p>Frequency (specify times per day/week/month)</p> <p>(Other VIII.)</p>                                                                                     | text                                                                                                                                                                                                                                                                                                                                                                                      |   |                 |   |                                                    |   |                                     |   |                                   |   |                                     |
| 403 | <p>pdcovidsympt_1_2</p> <p>Show the field ONLY if:<br/>[dem_7] = "1" AND [covid_1] = "1" OR [dem_7] = "1" AND [cov id_1] = "3"</p> | <p>Section Header: <i>(Motor symptom changes) Has any of the following symptoms changed because of COVID?</i></p> <p>Bradykinesia (slowness in movement)</p> | <p>radio (Matrix)</p> <table border="1"> <tr> <td>0</td> <td>0=Never present</td> </tr> <tr> <td>1</td> <td>1= Never present before COVID, present after COVID</td> </tr> <tr> <td>2</td> <td>2=Present before COVID, Less severe</td> </tr> <tr> <td>3</td> <td>3=Present before COVID, Unchanged</td> </tr> <tr> <td>4</td> <td>4=Present before COVID, More severe</td> </tr> </table> | 0 | 0=Never present | 1 | 1= Never present before COVID, present after COVID | 2 | 2=Present before COVID, Less severe | 3 | 3=Present before COVID, Unchanged | 4 | 4=Present before COVID, More severe |
| 0   | 0=Never present                                                                                                                    |                                                                                                                                                              |                                                                                                                                                                                                                                                                                                                                                                                           |   |                 |   |                                                    |   |                                     |   |                                   |   |                                     |
| 1   | 1= Never present before COVID, present after COVID                                                                                 |                                                                                                                                                              |                                                                                                                                                                                                                                                                                                                                                                                           |   |                 |   |                                                    |   |                                     |   |                                   |   |                                     |
| 2   | 2=Present before COVID, Less severe                                                                                                |                                                                                                                                                              |                                                                                                                                                                                                                                                                                                                                                                                           |   |                 |   |                                                    |   |                                     |   |                                   |   |                                     |
| 3   | 3=Present before COVID, Unchanged                                                                                                  |                                                                                                                                                              |                                                                                                                                                                                                                                                                                                                                                                                           |   |                 |   |                                                    |   |                                     |   |                                   |   |                                     |
| 4   | 4=Present before COVID, More severe                                                                                                |                                                                                                                                                              |                                                                                                                                                                                                                                                                                                                                                                                           |   |                 |   |                                                    |   |                                     |   |                                   |   |                                     |
| 404 | <p>pdcovidsympt_1_3</p> <p>Show the field ONLY if:<br/>[dem_7] = "1" AND [covid_1] = "1" OR [dem_7] = "1" AND [cov id_1] = "3"</p> | Rigidity (stiffness)                                                                                                                                         | <p>radio (Matrix)</p> <table border="1"> <tr> <td>0</td> <td>0=Never present</td> </tr> <tr> <td>1</td> <td>1= Never present before COVID, present after COVID</td> </tr> <tr> <td>2</td> <td>2=Present before COVID, Less severe</td> </tr> <tr> <td>3</td> <td>3=Present before COVID, Unchanged</td> </tr> <tr> <td>4</td> <td>4=Present before COVID, More severe</td> </tr> </table> | 0 | 0=Never present | 1 | 1= Never present before COVID, present after COVID | 2 | 2=Present before COVID, Less severe | 3 | 3=Present before COVID, Unchanged | 4 | 4=Present before COVID, More severe |
| 0   | 0=Never present                                                                                                                    |                                                                                                                                                              |                                                                                                                                                                                                                                                                                                                                                                                           |   |                 |   |                                                    |   |                                     |   |                                   |   |                                     |
| 1   | 1= Never present before COVID, present after COVID                                                                                 |                                                                                                                                                              |                                                                                                                                                                                                                                                                                                                                                                                           |   |                 |   |                                                    |   |                                     |   |                                   |   |                                     |
| 2   | 2=Present before COVID, Less severe                                                                                                |                                                                                                                                                              |                                                                                                                                                                                                                                                                                                                                                                                           |   |                 |   |                                                    |   |                                     |   |                                   |   |                                     |
| 3   | 3=Present before COVID, Unchanged                                                                                                  |                                                                                                                                                              |                                                                                                                                                                                                                                                                                                                                                                                           |   |                 |   |                                                    |   |                                     |   |                                   |   |                                     |
| 4   | 4=Present before COVID, More severe                                                                                                |                                                                                                                                                              |                                                                                                                                                                                                                                                                                                                                                                                           |   |                 |   |                                                    |   |                                     |   |                                   |   |                                     |
| 405 | <p>pdcovidsympt_1_7</p> <p>Show the field ONLY if:<br/>[dem_7] = "1" AND [covid_1] = "1" OR [dem_7] = "1" AND [cov id_1] = "3"</p> | Balance                                                                                                                                                      | <p>radio (Matrix)</p> <table border="1"> <tr> <td>0</td> <td>0=Never present</td> </tr> <tr> <td>1</td> <td>1= Never present before COVID, present after COVID</td> </tr> <tr> <td>2</td> <td>2=Present before COVID, Less severe</td> </tr> <tr> <td>3</td> <td>3=Present before COVID, Unchanged</td> </tr> <tr> <td>4</td> <td>4=Present before COVID, More severe</td> </tr> </table> | 0 | 0=Never present | 1 | 1= Never present before COVID, present after COVID | 2 | 2=Present before COVID, Less severe | 3 | 3=Present before COVID, Unchanged | 4 | 4=Present before COVID, More severe |
| 0   | 0=Never present                                                                                                                    |                                                                                                                                                              |                                                                                                                                                                                                                                                                                                                                                                                           |   |                 |   |                                                    |   |                                     |   |                                   |   |                                     |
| 1   | 1= Never present before COVID, present after COVID                                                                                 |                                                                                                                                                              |                                                                                                                                                                                                                                                                                                                                                                                           |   |                 |   |                                                    |   |                                     |   |                                   |   |                                     |
| 2   | 2=Present before COVID, Less severe                                                                                                |                                                                                                                                                              |                                                                                                                                                                                                                                                                                                                                                                                           |   |                 |   |                                                    |   |                                     |   |                                   |   |                                     |
| 3   | 3=Present before COVID, Unchanged                                                                                                  |                                                                                                                                                              |                                                                                                                                                                                                                                                                                                                                                                                           |   |                 |   |                                                    |   |                                     |   |                                   |   |                                     |
| 4   | 4=Present before COVID, More severe                                                                                                |                                                                                                                                                              |                                                                                                                                                                                                                                                                                                                                                                                           |   |                 |   |                                                    |   |                                     |   |                                   |   |                                     |
| 406 | <p>pdcovidsympt_1_8</p> <p>Show the field ONLY if:<br/>[dem_7] = "1" AND [covid_1] = "1" OR [dem_7] = "1" AND [cov id_1] = "3"</p> | Dyskinesias                                                                                                                                                  | <p>radio (Matrix)</p> <table border="1"> <tr> <td>0</td> <td>0=Never present</td> </tr> <tr> <td>1</td> <td>1= Never present before COVID, present after COVID</td> </tr> <tr> <td>2</td> <td>2=Present before COVID, Less severe</td> </tr> <tr> <td>3</td> <td>3=Present before COVID, Unchanged</td> </tr> <tr> <td>4</td> <td>4=Present before COVID, More severe</td> </tr> </table> | 0 | 0=Never present | 1 | 1= Never present before COVID, present after COVID | 2 | 2=Present before COVID, Less severe | 3 | 3=Present before COVID, Unchanged | 4 | 4=Present before COVID, More severe |
| 0   | 0=Never present                                                                                                                    |                                                                                                                                                              |                                                                                                                                                                                                                                                                                                                                                                                           |   |                 |   |                                                    |   |                                     |   |                                   |   |                                     |
| 1   | 1= Never present before COVID, present after COVID                                                                                 |                                                                                                                                                              |                                                                                                                                                                                                                                                                                                                                                                                           |   |                 |   |                                                    |   |                                     |   |                                   |   |                                     |
| 2   | 2=Present before COVID, Less severe                                                                                                |                                                                                                                                                              |                                                                                                                                                                                                                                                                                                                                                                                           |   |                 |   |                                                    |   |                                     |   |                                   |   |                                     |
| 3   | 3=Present before COVID, Unchanged                                                                                                  |                                                                                                                                                              |                                                                                                                                                                                                                                                                                                                                                                                           |   |                 |   |                                                    |   |                                     |   |                                   |   |                                     |
| 4   | 4=Present before COVID, More severe                                                                                                |                                                                                                                                                              |                                                                                                                                                                                                                                                                                                                                                                                           |   |                 |   |                                                    |   |                                     |   |                                   |   |                                     |

|     |                                                                                                                                                   |                                                                                                                                           |                                                                                                                                                                                                                                                                                                                                                                            |   |                 |   |                                                    |   |                                     |   |                                   |   |                                     |
|-----|---------------------------------------------------------------------------------------------------------------------------------------------------|-------------------------------------------------------------------------------------------------------------------------------------------|----------------------------------------------------------------------------------------------------------------------------------------------------------------------------------------------------------------------------------------------------------------------------------------------------------------------------------------------------------------------------|---|-----------------|---|----------------------------------------------------|---|-------------------------------------|---|-----------------------------------|---|-------------------------------------|
| 407 | <p>pdcovidsympt_1_9</p> <p>Show the field ONLY if:<br/>[dem_7] = "1" AND [covid_1] = "1" OR [dem_7] = "1" AND [cov id_1] = "3"</p>                | Dystonia                                                                                                                                  | <p>radio (Matrix)</p> <table border="1"> <tr><td>0</td><td>0=Never present</td></tr> <tr><td>1</td><td>1= Never present before COVID, present after COVID</td></tr> <tr><td>2</td><td>2=Present before COVID, Less severe</td></tr> <tr><td>3</td><td>3=Present before COVID, Unchanged</td></tr> <tr><td>4</td><td>4=Present before COVID, More severe</td></tr> </table> | 0 | 0=Never present | 1 | 1= Never present before COVID, present after COVID | 2 | 2=Present before COVID, Less severe | 3 | 3=Present before COVID, Unchanged | 4 | 4=Present before COVID, More severe |
| 0   | 0=Never present                                                                                                                                   |                                                                                                                                           |                                                                                                                                                                                                                                                                                                                                                                            |   |                 |   |                                                    |   |                                     |   |                                   |   |                                     |
| 1   | 1= Never present before COVID, present after COVID                                                                                                |                                                                                                                                           |                                                                                                                                                                                                                                                                                                                                                                            |   |                 |   |                                                    |   |                                     |   |                                   |   |                                     |
| 2   | 2=Present before COVID, Less severe                                                                                                               |                                                                                                                                           |                                                                                                                                                                                                                                                                                                                                                                            |   |                 |   |                                                    |   |                                     |   |                                   |   |                                     |
| 3   | 3=Present before COVID, Unchanged                                                                                                                 |                                                                                                                                           |                                                                                                                                                                                                                                                                                                                                                                            |   |                 |   |                                                    |   |                                     |   |                                   |   |                                     |
| 4   | 4=Present before COVID, More severe                                                                                                               |                                                                                                                                           |                                                                                                                                                                                                                                                                                                                                                                            |   |                 |   |                                                    |   |                                     |   |                                   |   |                                     |
| 408 | <p>pdcovidsympt_1_10</p> <p>Show the field ONLY if:<br/>[dem_7] = "1" AND [covid_1] = "1" OR [dem_7] = "1" AND [cov id_1] = "3"</p>               | OFF time                                                                                                                                  | <p>radio (Matrix)</p> <table border="1"> <tr><td>0</td><td>0=Never present</td></tr> <tr><td>1</td><td>1= Never present before COVID, present after COVID</td></tr> <tr><td>2</td><td>2=Present before COVID, Less severe</td></tr> <tr><td>3</td><td>3=Present before COVID, Unchanged</td></tr> <tr><td>4</td><td>4=Present before COVID, More severe</td></tr> </table> | 0 | 0=Never present | 1 | 1= Never present before COVID, present after COVID | 2 | 2=Present before COVID, Less severe | 3 | 3=Present before COVID, Unchanged | 4 | 4=Present before COVID, More severe |
| 0   | 0=Never present                                                                                                                                   |                                                                                                                                           |                                                                                                                                                                                                                                                                                                                                                                            |   |                 |   |                                                    |   |                                     |   |                                   |   |                                     |
| 1   | 1= Never present before COVID, present after COVID                                                                                                |                                                                                                                                           |                                                                                                                                                                                                                                                                                                                                                                            |   |                 |   |                                                    |   |                                     |   |                                   |   |                                     |
| 2   | 2=Present before COVID, Less severe                                                                                                               |                                                                                                                                           |                                                                                                                                                                                                                                                                                                                                                                            |   |                 |   |                                                    |   |                                     |   |                                   |   |                                     |
| 3   | 3=Present before COVID, Unchanged                                                                                                                 |                                                                                                                                           |                                                                                                                                                                                                                                                                                                                                                                            |   |                 |   |                                                    |   |                                     |   |                                   |   |                                     |
| 4   | 4=Present before COVID, More severe                                                                                                               |                                                                                                                                           |                                                                                                                                                                                                                                                                                                                                                                            |   |                 |   |                                                    |   |                                     |   |                                   |   |                                     |
| 409 | <p>pdcovidsympt_1_2_1</p> <p>Show the field ONLY if:<br/>[pdcovidsympt_1_2] = "1" OR [pdcovidsympt_1_2] = "2" OR [pdcovidsympt_1_2] = "4"</p>     | Details (Bradykinesia (slowness in movement))                                                                                             | notes                                                                                                                                                                                                                                                                                                                                                                      |   |                 |   |                                                    |   |                                     |   |                                   |   |                                     |
| 410 | <p>pdcovidsympt_1_3_1</p> <p>Show the field ONLY if:<br/>[pdcovidsympt_1_3] = "1" OR [pdcovidsympt_1_3] = "2" OR [pdcovidsympt_1_3] = "4"</p>     | Details (Rigidity (stiffness))                                                                                                            | notes                                                                                                                                                                                                                                                                                                                                                                      |   |                 |   |                                                    |   |                                     |   |                                   |   |                                     |
| 411 | <p>pdcovidsympt_1_7_1</p> <p>Show the field ONLY if:<br/>[pdcovidsympt_1_7] = "1" OR [pdcovidsympt_1_7] = "2" OR [pdcovidsympt_1_7] = "4"</p>     | Details (Balance)                                                                                                                         | notes                                                                                                                                                                                                                                                                                                                                                                      |   |                 |   |                                                    |   |                                     |   |                                   |   |                                     |
| 412 | <p>pdcovidsympt_1_8_1</p> <p>Show the field ONLY if:<br/>[pdcovidsympt_1_8] = "1" OR [pdcovidsympt_1_8] = "2" OR [pdcovidsympt_1_8] = "4"</p>     | Details (Dyskinesias)                                                                                                                     | notes                                                                                                                                                                                                                                                                                                                                                                      |   |                 |   |                                                    |   |                                     |   |                                   |   |                                     |
| 413 | <p>pdcovidsympt_1_9_1</p> <p>Show the field ONLY if:<br/>[pdcovidsympt_1_9] = "1" OR [pdcovidsympt_1_9] = "2" OR [pdcovidsympt_1_9] = "4"</p>     | Details (Dystonia)                                                                                                                        | notes                                                                                                                                                                                                                                                                                                                                                                      |   |                 |   |                                                    |   |                                     |   |                                   |   |                                     |
| 414 | <p>pdcovidsympt_1_10_1</p> <p>Show the field ONLY if:<br/>[pdcovidsympt_1_10] = "1" OR [pdcovidsympt_1_10] = "2" OR [pdcovidsympt_1_10] = "4"</p> | Details (OFF time)                                                                                                                        | notes                                                                                                                                                                                                                                                                                                                                                                      |   |                 |   |                                                    |   |                                     |   |                                   |   |                                     |
| 415 | <p>updrs_1_1</p> <p>Show the field ONLY if:<br/>[dem_7] = "1" AND [covid_1] = "1" OR [dem_7] = "1" AND [cov id_1] = "3"</p>                       | <p>Section Header: (Nonmotor) UPDRS Part I &amp; II (Has any of the following symptoms changed because of COVID?)</p> <p>1. Mentation</p> | <p>radio (Matrix)</p> <table border="1"> <tr><td>0</td><td>0=Never present</td></tr> <tr><td>1</td><td>1= Never present before COVID, present after COVID</td></tr> <tr><td>2</td><td>2=Present before COVID, Less severe</td></tr> <tr><td>3</td><td>3=Present before COVID, Unchanged</td></tr> <tr><td>4</td><td>4=Present before COVID, More severe</td></tr> </table> | 0 | 0=Never present | 1 | 1= Never present before COVID, present after COVID | 2 | 2=Present before COVID, Less severe | 3 | 3=Present before COVID, Unchanged | 4 | 4=Present before COVID, More severe |
| 0   | 0=Never present                                                                                                                                   |                                                                                                                                           |                                                                                                                                                                                                                                                                                                                                                                            |   |                 |   |                                                    |   |                                     |   |                                   |   |                                     |
| 1   | 1= Never present before COVID, present after COVID                                                                                                |                                                                                                                                           |                                                                                                                                                                                                                                                                                                                                                                            |   |                 |   |                                                    |   |                                     |   |                                   |   |                                     |
| 2   | 2=Present before COVID, Less severe                                                                                                               |                                                                                                                                           |                                                                                                                                                                                                                                                                                                                                                                            |   |                 |   |                                                    |   |                                     |   |                                   |   |                                     |
| 3   | 3=Present before COVID, Unchanged                                                                                                                 |                                                                                                                                           |                                                                                                                                                                                                                                                                                                                                                                            |   |                 |   |                                                    |   |                                     |   |                                   |   |                                     |
| 4   | 4=Present before COVID, More severe                                                                                                               |                                                                                                                                           |                                                                                                                                                                                                                                                                                                                                                                            |   |                 |   |                                                    |   |                                     |   |                                   |   |                                     |
| 416 | <p>updrs_1_2</p> <p>Show the field ONLY if:<br/>[dem_7] = "1" AND [covid_1] = "1" OR [dem_7] = "1" AND [cov id_1] = "3"</p>                       | 2. Thought Disorder                                                                                                                       | <p>radio (Matrix)</p> <table border="1"> <tr><td>0</td><td>0=Never present</td></tr> <tr><td>1</td><td>1= Never present before COVID, present after COVID</td></tr> <tr><td>2</td><td>2=Present before COVID, Less severe</td></tr> <tr><td>3</td><td>3=Present before COVID, Unchanged</td></tr> <tr><td>4</td><td>4=Present before COVID, More severe</td></tr> </table> | 0 | 0=Never present | 1 | 1= Never present before COVID, present after COVID | 2 | 2=Present before COVID, Less severe | 3 | 3=Present before COVID, Unchanged | 4 | 4=Present before COVID, More severe |
| 0   | 0=Never present                                                                                                                                   |                                                                                                                                           |                                                                                                                                                                                                                                                                                                                                                                            |   |                 |   |                                                    |   |                                     |   |                                   |   |                                     |
| 1   | 1= Never present before COVID, present after COVID                                                                                                |                                                                                                                                           |                                                                                                                                                                                                                                                                                                                                                                            |   |                 |   |                                                    |   |                                     |   |                                   |   |                                     |
| 2   | 2=Present before COVID, Less severe                                                                                                               |                                                                                                                                           |                                                                                                                                                                                                                                                                                                                                                                            |   |                 |   |                                                    |   |                                     |   |                                   |   |                                     |
| 3   | 3=Present before COVID, Unchanged                                                                                                                 |                                                                                                                                           |                                                                                                                                                                                                                                                                                                                                                                            |   |                 |   |                                                    |   |                                     |   |                                   |   |                                     |
| 4   | 4=Present before COVID, More severe                                                                                                               |                                                                                                                                           |                                                                                                                                                                                                                                                                                                                                                                            |   |                 |   |                                                    |   |                                     |   |                                   |   |                                     |

|     |                                                                                                                 |                          |                                                                                                                                                                                                                      |
|-----|-----------------------------------------------------------------------------------------------------------------|--------------------------|----------------------------------------------------------------------------------------------------------------------------------------------------------------------------------------------------------------------|
| 417 | updrs_1_3<br>Show the field ONLY if:<br>[dem_7] = "1" AND [covid_1] = "1" OR [dem_7] = "1" AND [cov id_1] = "3" | 3. Depression            | radio (Matrix)<br>0 0=Never present<br>1 1= Never present before COVID, present after COVID<br>2 2=Present before COVID, Less severe<br>3 3=Present before COVID, Unchanged<br>4 4=Present before COVID, More severe |
| 418 | updrs_1_4<br>Show the field ONLY if:<br>[dem_7] = "1" AND [covid_1] = "1" OR [dem_7] = "1" AND [cov id_1] = "3" | 4. Motivation/Initiative | radio (Matrix)<br>0 0=Never present<br>1 1= Never present before COVID, present after COVID<br>2 2=Present before COVID, Less severe<br>3 3=Present before COVID, Unchanged<br>4 4=Present before COVID, More severe |
| 419 | updrs_1_5<br>Show the field ONLY if:<br>[dem_7] = "1" AND [covid_1] = "1" OR [dem_7] = "1" AND [cov id_1] = "3" | 5. Speech                | radio (Matrix)<br>0 0=Never present<br>1 1= Never present before COVID, present after COVID<br>2 2=Present before COVID, Less severe<br>3 3=Present before COVID, Unchanged<br>4 4=Present before COVID, More severe |
| 420 | updrs_1_6<br>Show the field ONLY if:<br>[dem_7] = "1" AND [covid_1] = "1" OR [dem_7] = "1" AND [cov id_1] = "3" | 6. Salivation            | radio (Matrix)<br>0 0=Never present<br>1 1= Never present before COVID, present after COVID<br>2 2=Present before COVID, Less severe<br>3 3=Present before COVID, Unchanged<br>4 4=Present before COVID, More severe |
| 421 | updrs_1_7<br>Show the field ONLY if:<br>[dem_7] = "1" AND [covid_1] = "1" OR [dem_7] = "1" AND [cov id_1] = "3" | 7. Swallowing            | radio (Matrix)<br>0 0=Never present<br>1 1= Never present before COVID, present after COVID<br>2 2=Present before COVID, Less severe<br>3 3=Present before COVID, Unchanged<br>4 4=Present before COVID, More severe |
| 422 | updrs_1_8<br>Show the field ONLY if:<br>[dem_7] = "1" AND [covid_1] = "1" OR [dem_7] = "1" AND [cov id_1] = "3" | 8. Handwriting           | radio (Matrix)<br>0 0=Never present<br>1 1= Never present before COVID, present after COVID<br>2 2=Present before COVID, Less severe<br>3 3=Present before COVID, Unchanged<br>4 4=Present before COVID, More severe |
| 423 | updrs_1_9<br>Show the field ONLY if:<br>[dem_7] = "1" AND [covid_1] = "1" OR [dem_7] = "1" AND [cov id_1] = "3" | 9. Cutting food          | radio (Matrix)<br>0 0=Never present<br>1 1= Never present before COVID, present after COVID<br>2 2=Present before COVID, Less severe<br>3 3=Present before COVID, Unchanged<br>4 4=Present before COVID, More severe |

|     |                                                                                                                  |                    |                                                                                                                                                                                                                      |
|-----|------------------------------------------------------------------------------------------------------------------|--------------------|----------------------------------------------------------------------------------------------------------------------------------------------------------------------------------------------------------------------|
| 424 | updrs_1_10<br>Show the field ONLY if:<br>[dem_7] = "1" AND [covid_1] = "1" OR [dem_7] = "1" AND [cov id_1] = "3" | 10. Dressing       | radio (Matrix)<br>0 0=Never present<br>1 1= Never present before COVID, present after COVID<br>2 2=Present before COVID, Less severe<br>3 3=Present before COVID, Unchanged<br>4 4=Present before COVID, More severe |
| 425 | updrs_1_11<br>Show the field ONLY if:<br>[dem_7] = "1" AND [covid_1] = "1" OR [dem_7] = "1" AND [cov id_1] = "3" | 11. Hygiene        | radio (Matrix)<br>0 0=Never present<br>1 1= Never present before COVID, present after COVID<br>2 2=Present before COVID, Less severe<br>3 3=Present before COVID, Unchanged<br>4 4=Present before COVID, More severe |
| 426 | updrs_1_12<br>Show the field ONLY if:<br>[dem_7] = "1" AND [covid_1] = "1" OR [dem_7] = "1" AND [cov id_1] = "3" | 12. Turning in bed | radio (Matrix)<br>0 0=Never present<br>1 1= Never present before COVID, present after COVID<br>2 2=Present before COVID, Less severe<br>3 3=Present before COVID, Unchanged<br>4 4=Present before COVID, More severe |
| 427 | updrs_1_13<br>Show the field ONLY if:<br>[dem_7] = "1" AND [covid_1] = "1" OR [dem_7] = "1" AND [cov id_1] = "3" | 13. Falling        | radio (Matrix)<br>0 0=Never present<br>1 1= Never present before COVID, present after COVID<br>2 2=Present before COVID, Less severe<br>3 3=Present before COVID, Unchanged<br>4 4=Present before COVID, More severe |
| 428 | updrs_1_14<br>Show the field ONLY if:<br>[dem_7] = "1" AND [covid_1] = "1" OR [dem_7] = "1" AND [cov id_1] = "3" | 14. Freezing       | radio (Matrix)<br>0 0=Never present<br>1 1= Never present before COVID, present after COVID<br>2 2=Present before COVID, Less severe<br>3 3=Present before COVID, Unchanged<br>4 4=Present before COVID, More severe |
| 429 | updrs_1_15<br>Show the field ONLY if:<br>[dem_7] = "1" AND [covid_1] = "1" OR [dem_7] = "1" AND [cov id_1] = "3" | 15. Walking        | radio (Matrix)<br>0 0=Never present<br>1 1= Never present before COVID, present after COVID<br>2 2=Present before COVID, Less severe<br>3 3=Present before COVID, Unchanged<br>4 4=Present before COVID, More severe |
| 430 | updrs_1_16<br>Show the field ONLY if:<br>[dem_7] = "1" AND [covid_1] = "1" OR [dem_7] = "1" AND [cov id_1] = "3" | 16. Tremor         | radio (Matrix)<br>0 0=Never present<br>1 1= Never present before COVID, present after COVID<br>2 2=Present before COVID, Less severe<br>3 3=Present before COVID, Unchanged<br>4 4=Present before COVID, More severe |

|     |                                                                                                                                                                         |                                                                                                                    |                                                                                                                                                                                                                      |
|-----|-------------------------------------------------------------------------------------------------------------------------------------------------------------------------|--------------------------------------------------------------------------------------------------------------------|----------------------------------------------------------------------------------------------------------------------------------------------------------------------------------------------------------------------|
| 431 | updrs_1_17<br>Show the field ONLY if:<br>[dem_7] = "1" AND [covid_1] = "1" OR [dem_7] = "1" AND [cov id_1] = "3"                                                        | 17. Sensory symptoms                                                                                               | radio (Matrix)<br>0 0=Never present<br>1 1= Never present before COVID, present after COVID<br>2 2=Present before COVID, Less severe<br>3 3=Present before COVID, Unchanged<br>4 4=Present before COVID, More severe |
| 432 | pdnonmotorsymp_1_1<br>Show the field ONLY if:<br>[dem_7] = "1" AND [covid_1] = "1" OR [dem_7] = "1" AND [cov id_1] = "3"                                                | Section Header: (Non-motor symptom) Has any of the following symptoms changed because of COVID?<br>Sleep- Insomnia | radio (Matrix)<br>0 0=Never present<br>1 1= Never present before COVID, present after COVID<br>2 2=Present before COVID, Less severe<br>3 3=Present before COVID, Unchanged<br>4 4=Present before COVID, More severe |
| 433 | pdnonmotorsymp_1_2<br>Show the field ONLY if:<br>[dem_7] = "1" AND [covid_1] = "1" OR [dem_7] = "1" AND [cov id_1] = "3"                                                | Anxiety                                                                                                            | radio (Matrix)<br>0 0=Never present<br>1 1= Never present before COVID, present after COVID<br>2 2=Present before COVID, Less severe<br>3 3=Present before COVID, Unchanged<br>4 4=Present before COVID, More severe |
| 434 | pdnonmotorsymp_1_3<br>Show the field ONLY if:<br>[dem_7] = "1" AND [covid_1] = "1" OR [dem_7] = "1" AND [cov id_1] = "3"                                                | Constipation                                                                                                       | radio (Matrix)<br>0 0=Never present<br>1 1= Never present before COVID, present after COVID<br>2 2=Present before COVID, Less severe<br>3 3=Present before COVID, Unchanged<br>4 4=Present before COVID, More severe |
| 435 | pdnonmotorsymp_1_4<br>Show the field ONLY if:<br>[dem_7] = "1" AND [covid_1] = "1" OR [dem_7] = "1" AND [cov id_1] = "3"                                                | Pain                                                                                                               | radio (Matrix)<br>0 0=Never present<br>1 1= Never present before COVID, present after COVID<br>2 2=Present before COVID, Less severe<br>3 3=Present before COVID, Unchanged<br>4 4=Present before COVID, More severe |
| 436 | pdnonmotorsymp_1_5<br>Show the field ONLY if:<br>[dem_7] = "1" AND [covid_1] = "1" OR [dem_7] = "1" AND [cov id_1] = "3"                                                | Urinary issues                                                                                                     | radio (Matrix)<br>0 0=Never present<br>1 1= Never present before COVID, present after COVID<br>2 2=Present before COVID, Less severe<br>3 3=Present before COVID, Unchanged<br>4 4=Present before COVID, More severe |
| 437 | pdnonmotorsymp_1_5_1<br>Show the field ONLY if:<br>[pdnonmotorsymp_1_5] = "1" OR [pdnonmotorsymp_1_5] = "2" OR [pdnonmotorsymp_1_5] = "3" OR [pdnonmotorsymp_1_5] = "4" | Specify<br>(Urinary issues)                                                                                        | checkbox<br>1 pdnonmotorsymp_1_5_1__1 incontinence<br>2 pdnonmotorsymp_1_5_1__2 urgency<br>3 pdnonmotorsymp_1_5_1__3 frequency                                                                                       |
| 438 | followup_telephone_survey_complete                                                                                                                                      | Section Header: Form Status<br>Complete?                                                                           | dropdown<br>0 Incomplete<br>1 Unverified<br>2 Complete                                                                                                                                                               |
